# Supplementary material for: An isothiourea-catalyzed asymmetric formal [4 + 2] cycloaddition of in situ generated azoalkenes with C1 ammonium enolates
Source: Royal Society of Chemistry journal article supplement (doi:10.1039/c8qo00657a), 2018-01-01
Supplement: c8qo00657a1.pdf [file c8qo00657a1.pdf]

## Supporting Information

### An Isothiourea-Catalyzed Asymmetric Formal [4+2] Cycloaddition of *in situ* Generated Azoalkenes with C1 Ammonium Enolates

Zi-Jing Zhang, Jin Song\*

*Department of Chemistry, University of Science and Technology of China, Hefei 230026, China*

*E-mail: jill@ustc.edu.cn*

#### 1. General Information

##### General data:

NMR spectra were recorded on a Bruker-400 MHz spectrometer. Chemical shifts ( $\delta$ ) are given in ppm relative to TMS. The residual solvent signals were used as references and the chemical shifts converted to the TMS scale (CDCl<sub>3</sub>:  $\delta$ H = 7.26 ppm,  $\delta$ C = 77.16 ppm).

The high resolution mass spectra were recorded on a Thermo LTQ Orbitrap XL (ESI+) or a P-SIMS-Gly of Bruker Daltonics Inc (EI+). Infrared spectra were recorded on a Nicolet MX-1E FT-IR spectrometer.

Enantiomeric excesses were performed on Waters-Breeze (2487 Dual  $\lambda$  Absorbance Detector and 1525 Binary HPLC Pump, UV detection monitored at 254 nm). Chiralpak AD-H and OD-H columns were purchased from Daicel Chemical Industries, LTD.

Optical rotations were determined at 589 nm (sodium D line) by using a Perkin-Elmer-343 polarimeter.

##### Materials:

All starting materials, reagents and solvents were purchased from commercial suppliers (Aldrich, Alfa, TCI, Adamas, etc.) and used as supplied unless otherwise stated. Some substrates<sup>[1]</sup> and chiral Lewis base catalysts<sup>[2]</sup> were synthesized in accordance with the similar procedures in literatures. Toluene was dried over Na and distilled prior to use.

## 2. Details for Condition Optimization

Table S1. Optimal Conditions for the Asymmetric Formal [4+2] Cycloaddition Reaction<sup>a</sup>

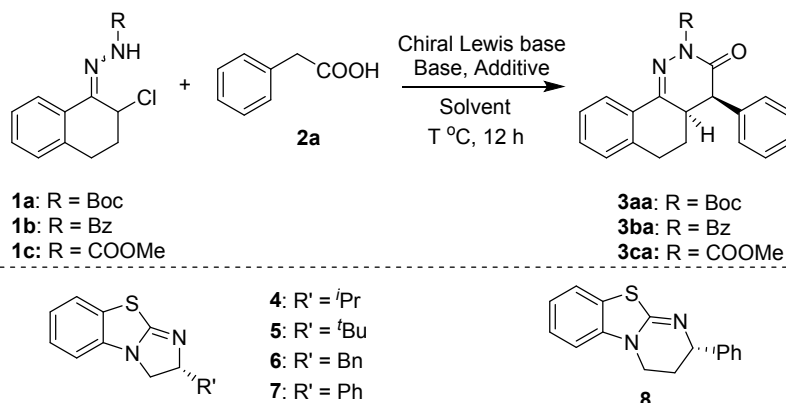

| Entry           | 1  | Chiral Lewis base | Base                            | Solvent            | T/°C | Yield <sup>b</sup> (%) | dr <sup>c</sup> | ee <sup>d</sup> (%) |
|-----------------|----|-------------------|---------------------------------|--------------------|------|------------------------|-----------------|---------------------|
| 1 <sup>e</sup>  | 1a | 4                 | <i>i</i> Pr <sub>2</sub> NEt    | THF                | -20  | 79                     | 91:9            | >99                 |
| 2 <sup>e</sup>  | 1a | 4                 | -                               | THF                | -20  | N.R.                   | -               | -                   |
| 3 <sup>e</sup>  | 1a | -                 | <i>i</i> Pr <sub>2</sub> NEt    | THF                | -20  | N.R.                   | -               | -                   |
| 4               | 1a | 4                 | <i>i</i> Pr <sub>2</sub> NEt    | THF                | -20  | 97                     | 92:8            | >99                 |
| 5               | 1a | 4                 | <i>i</i> Pr <sub>2</sub> NEt    | THF                | -30  | 90                     | 92:8            | >99                 |
| 6               | 1a | 4                 | <i>i</i> Pr <sub>2</sub> NEt    | THF                | 0    | 99                     | 92:8            | >99                 |
| 7               | 1a | 4                 | <i>i</i> Pr <sub>2</sub> NEt    | THF                | 25   | 99                     | 90:10           | >99                 |
| 8               | 1b | 4                 | <i>i</i> Pr <sub>2</sub> NEt    | THF                | 0    | 89                     | 85:15           | >99 (86)            |
| 9               | 1c | 4                 | <i>i</i> Pr <sub>2</sub> NEt    | THF                | 0    | 94                     | 80:20           | 99 (55)             |
| 10              | 1a | 4                 | Na <sub>2</sub> CO <sub>3</sub> | THF                | 0    | 99                     | 89:11           | >99                 |
| 11              | 1a | 4                 | K <sub>2</sub> CO <sub>3</sub>  | THF                | 0    | 47                     | 90:10           | >99                 |
| 12              | 1a | 4                 | NEt <sub>3</sub>                | THF                | 0    | 93                     | 92:8            | >99                 |
| 13 <sup>f</sup> | 1a | 4                 | <i>i</i> Pr <sub>2</sub> NEt    | THF                | 0    | 97                     | 92:8            | >99                 |
| 14 <sup>f</sup> | 1a | 5                 | <i>i</i> Pr <sub>2</sub> NEt    | THF                | 0    | 88                     | 92:8            | >99                 |
| 15 <sup>f</sup> | 1a | 6                 | <i>i</i> Pr <sub>2</sub> NEt    | THF                | 0    | 98                     | 85:15           | >99                 |
| 16 <sup>f</sup> | 1a | 7                 | <i>i</i> Pr <sub>2</sub> NEt    | THF                | 0    | 80                     | 83:17           | 99                  |
| 17 <sup>f</sup> | 1a | 8                 | <i>i</i> Pr <sub>2</sub> NEt    | THF                | 0    | 80                     | 72:28           | 99                  |
| 18 <sup>f</sup> | 1a | 4                 | <i>i</i> Pr <sub>2</sub> NEt    | DCM                | 0    | 63                     | 91:9            | >99                 |
| 19 <sup>f</sup> | 1a | 4                 | <i>i</i> Pr <sub>2</sub> NEt    | DCE                | 0    | 88                     | 93:7            | >99                 |
| 20 <sup>f</sup> | 1a | 4                 | <i>i</i> Pr <sub>2</sub> NEt    | CH <sub>3</sub> CN | 0    | 80                     | 82:18           | 99                  |
| 21 <sup>f</sup> | 1a | 4                 | <i>i</i> Pr <sub>2</sub> NEt    | Toluen             | 0    | 95                     | >95:5           | >99                 |

<sup>a</sup> Unless noted, reactions were performed with **1** (0.20 mmol), **2a** (0.30 mmol), *t*BuCOCl (0.40 mmol), Base (0.80 mmol), chiral Lewis base (0.04 mmol, 20 mol%), solvent (2.0 mL). <sup>b</sup> Isolated yield. <sup>c</sup> The diastereomeric ratios were determined by <sup>1</sup>H NMR spectroscopic analysis. <sup>d</sup> Determined by HPLC analysis. <sup>e</sup> Using TsCl (0.40 mmol) instead of *t*BuCOCl (0.40 mmol). <sup>f</sup> Chiral Lewis base (0.02 mmol, 10 mol%) was used. DCM = dichloromethane. DCE = 1,2-dichloroethane.

## 3. General Procedure and Characterization of Products

To a flame-dried and N<sub>2</sub>-purged Schlenk tube **A** were added requisite acid **2** (0.30 mmol), <sup>t</sup>BuCOCl (0.40 mmol), <sup>i</sup>Pr<sub>2</sub>NEt (0.40 mmol) and Toluene (1.0 mL). The suspension was stirred for 15 min at 0 °C. Meanwhile, to another flame-dried and N<sub>2</sub>-purged Schlenk tube **B** were added **1** (0.20 mmol) and Toluene (0.5 mL). The resulting solution was stirred for 10 min at 0 °C. Then the solution in Schlenk tube **A** (1.0 mL) was added to Schlenk tube **B**. Then, a solution of chiral Lewis base catalyst (0.02 mmol, 10 mol%) and <sup>i</sup>Pr<sub>2</sub>NEt (0.40 mmol) in Toluene (0.5 mL) was also added to Schlenk tube **B**. The resulting solution was stirred at 0 °C for 12 hours. After purification by column chromatography on silica gel (Petrol ether: Ethyl acetate = 10:1) the desired product **3** was obtained.

#### 4. Characterization Data of Substrates and Products

##### *tert*-butyl 2-(2-chloro-3,4-dihydronaphthalen-1(2*H*)-ylidene)hydrazine-1-carboxylate (**1a**)

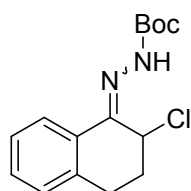

White solid; <sup>1</sup>H NMR (400 MHz, CDCl<sub>3</sub>) δ 8.32 (s, 1H), 8.23 (d, *J* = 7.3 Hz, 1H), 7.30 - 7.19 (m, 2H), 7.13 (d, *J* = 7.0 Hz, 1H), 5.06 (t, *J* = 3.2 Hz, 1H), 3.23 (ddd, *J* = 16.4, 12.3, 4.2 Hz, 1H), 2.71 (dt, *J* = 16.3, 3.5 Hz, 1H), 2.39 - 2.21 (m, 2H), 1.57 (s, 9H). <sup>13</sup>C NMR (100 MHz, CDCl<sub>3</sub>) δ 152.55, 144.12, 137.62, 129.76, 129.43, 128.30, 126.87, 125.45, 81.95, 48.95, 31.17, 28.27, 24.08. IR (KBr, cm<sup>-1</sup>) γ 3239, 2979, 1701, 1532, 1454, 1393, 1368, 1272, 1248, 1145, 1066, 1011, 862, 814, 771; HRMS (ESI) *m/z* (M+Na)<sup>+</sup>: calculated for C<sub>15</sub>H<sub>19</sub>ClN<sub>2</sub>O<sub>2</sub>Na: 317.1033, found: 317.1024.

##### *tert*-butyl 2-(2-chloro-7-fluoro-3,4-dihydronaphthalen-1(2*H*)-ylidene)hydrazine-1-carboxylate (**1d**)

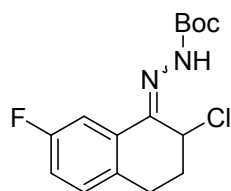

White solid; <sup>1</sup>H NMR (400 MHz, CDCl<sub>3</sub>) δ 8.31 (s, 1H), 7.89 (d, *J* = 8.8 Hz, 1H), 7.10 (dd, *J* = 8.4, 5.6 Hz, 1H), 6.96 (td, *J* = 8.3, 2.7 Hz, 1H), 5.03 (t, *J* = 3.2 Hz, 1H), 3.27 - 3.08 (m, 1H), 2.70 (dt, *J* = 16.2, 3.5 Hz, 1H), 2.41 - 2.13 (m, 2H), 1.56 (s, 9H). <sup>13</sup>C NMR (100 MHz, CDCl<sub>3</sub>) δ 161.78 (d, *J* = 244.2 Hz), 152.42, 143.02, 133.27 (d, *J* = 2.9 Hz), 131.63 (d, *J* = 8.0 Hz), 129.88 (d, *J* = 7.8 Hz), 116.77 (d, *J* = 22.2 Hz), 111.49 (d, *J* = 23.4 Hz), 82.23, 48.29, 31.13, 28.23, 23.38. IR (KBr, cm<sup>-1</sup>) γ 3192, 2978, 1733, 1703, 1539, 1492, 1393, 1368, 1275, 1249, 1226, 1147, 1063, 1015, 813, 752, 741; HRMS (ESI) *m/z* (M+Na)<sup>+</sup>: calculated for C<sub>15</sub>H<sub>18</sub>ClFN<sub>2</sub>O<sub>2</sub>Na: 335.0939, found: 335.0932.

**tert-butyl 2-(2,7-dichloro-3,4-dihydronaphthalen-1(2H)-ylidene)hydrazine-1-carboxylate (1e)**

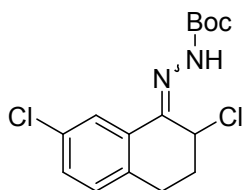

White solid;  $^1\text{H NMR}$  (400 MHz,  $\text{CDCl}_3$ )  $\delta$  8.28 (s, 1H), 8.21 (s, 1H), 7.22 (dd,  $J = 8.2, 2.2$  Hz, 1H), 7.08 (d,  $J = 8.2$  Hz, 1H), 5.03 (t,  $J = 3.3$  Hz, 1H), 3.18 (ddd,  $J = 16.4, 12.5, 4.0$  Hz, 1H), 2.70 (dt,  $J = 16.4, 3.5$  Hz, 1H), 2.41 – 2.13 (m, 2H), 1.57 (s, 9H).  $^{13}\text{C NMR}$  (100 MHz,  $\text{CDCl}_3$ )  $\delta$  152.30, 142.79, 135.83, 132.98, 131.32, 129.68, 129.43, 125.07, 82.28, 48.37, 30.96, 28.23, 23.57. **IR** (KBr,  $\text{cm}^{-1}$ )  $\gamma$  3219, 2977, 1685, 1385, 1370, 1349, 1146, 1059, 1015, 909, 817, 749; **HRMS** (ESI)  $m/z$  ( $\text{M}+\text{Na}$ ) $^+$ : calculated for  $\text{C}_{15}\text{H}_{18}\text{Cl}_2\text{N}_2\text{O}_2\text{Na}$ : 351.0643, found: 351.0638.

**tert-butyl 2-(7-bromo-2-chloro-3,4-dihydronaphthalen-1(2H)-ylidene)hydrazine-1-carboxylate (1f)**

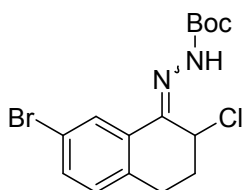

White solid;  $^1\text{H NMR}$  (400 MHz,  $\text{CDCl}_3$ )  $\delta$  8.37 (s, 1H), 8.24 (s, 1H), 7.37 (dd,  $J = 8.2, 2.1$  Hz, 1H), 7.02 (d,  $J = 8.1$  Hz, 1H), 5.01 (t,  $J = 3.3$  Hz, 1H), 3.23 – 3.06 (m, 1H), 2.69 (dt,  $J = 16.3, 3.5$  Hz, 1H), 2.36 (ddd,  $J = 14.5, 7.2, 3.3$  Hz, 1H), 2.30 – 2.18 (m, 1H), 1.57 (s, 9H).  $^{13}\text{C NMR}$  (100 MHz,  $\text{CDCl}_3$ )  $\delta$  152.27, 142.62, 136.30, 132.30, 131.63, 129.92, 128.02, 120.94, 82.28, 48.37, 30.91, 28.22, 23.64. **IR** (KBr,  $\text{cm}^{-1}$ )  $\gamma$  3190, 2978, 1682, 1382, 1345, 1145, 1056, 1010, 908, 812, 747; **HRMS** (ESI)  $m/z$  ( $\text{M}+\text{Na}$ ) $^+$ : calculated for  $\text{C}_{15}\text{H}_{18}\text{BrClN}_2\text{O}_2\text{Na}$ : 395.0138, found: 395.0135.

**tert-butyl 2-(2-chloro-7-methyl-3,4-dihydronaphthalen-1(2H)-ylidene)hydrazine-1-carboxylate (1g)**

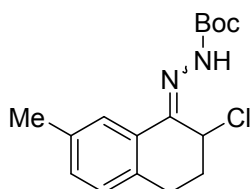

White solid;  $^1\text{H NMR}$  (400 MHz,  $\text{CDCl}_3$ )  $\delta$  8.26 (s, 1H), 8.06 (s, 1H), 7.09 (dd,  $J = 7.8, 1.3$  Hz, 1H), 7.03 (d,  $J = 7.8$  Hz, 1H), 5.04 (t,  $J = 3.3$  Hz, 1H), 3.29 – 3.07 (m, 1H), 2.68 (dt,  $J = 16.2, 3.5$  Hz, 1H), 2.36 (dd,  $J = 7.2, 3.3$  Hz, 1H), 2.32 (s, 3H), 2.30 – 2.20 (m, 1H), 1.57 (s, 9H).  $^{13}\text{C NMR}$  (100 MHz,  $\text{CDCl}_3$ )  $\delta$  152.54, 144.47, 136.52, 134.81, 130.55, 129.37, 128.20, 125.53, 81.94, 49.09, 31.33, 28.26, 23.70, 21.09. **IR** (KBr,  $\text{cm}^{-1}$ )  $\gamma$  3217, 2977, 1703, 1531, 1498, 1367, 1250, 1145, 1058, 1019, 814, 764, 750; **HRMS** (ESI)  $m/z$  ( $\text{M}+\text{Na}$ ) $^+$ : calculated for  $\text{C}_{16}\text{H}_{21}\text{ClN}_2\text{O}_2\text{Na}$ : 331.1189, found: 331.1180.

***tert*-butyl 2-(2-chloro-7-methoxy-3,4-dihydronaphthalen-1(2*H*)-ylidene)hydrazine-1-carboxylate (1h)**

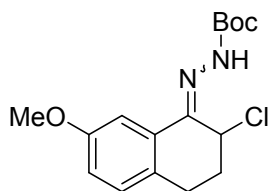

White solid;  $^1\text{H NMR}$  (400 MHz,  $\text{CDCl}_3$ )  $\delta$  8.33 (s, 1H), 7.72 (d,  $J = 2.6$  Hz, 1H), 7.05 (d,  $J = 8.4$  Hz, 1H), 6.86 (dd,  $J = 8.4, 2.7$  Hz, 1H), 5.05 (t,  $J = 3.2$  Hz, 1H), 3.83 (s, 3H), 3.16 (ddd,  $J = 16.2, 12.4, 4.0$  Hz, 1H), 2.66 (dt,  $J = 16.1, 3.5$  Hz, 1H), 2.44 – 2.30 (m, 1H), 2.28 – 2.19 (m, 1H), 1.57 (s, 9H).  $^{13}\text{C}$

$\text{NMR}$  (100 MHz,  $\text{CDCl}_3$ )  $\delta$  158.46, 152.54, 144.06, 130.58, 130.32, 129.46, 117.95, 107.62, 81.95, 55.42, 48.84, 31.36, 28.27, 23.29. **IR** (KBr,  $\text{cm}^{-1}$ )  $\gamma$  3223, 2978, 1736, 1701, 1533, 1495, 1368, 1290, 1272, 1240, 1149, 1065, 1036, 1013, 857, 820, 740; **HRMS** (ESI)  $m/z$  ( $\text{M}+\text{Na}$ ) $^+$ : calculated for  $\text{C}_{16}\text{H}_{21}\text{ClN}_2\text{O}_3\text{Na}$ : 347.1138, found: 347.1131.

***tert*-butyl 2-(2,6-dichloro-3,4-dihydronaphthalen-1(2*H*)-ylidene)hydrazine-1-carboxylate (1i)**

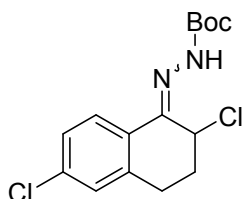

White solid;  $^1\text{H NMR}$  (400 MHz,  $\text{CDCl}_3$ )  $\delta$  8.27 (s, 1H), 8.16 (d,  $J = 7.8$  Hz, 1H), 7.20 (dd,  $J = 28.0, 20.0$  Hz, 2H), 5.03 (s, 1H), 3.22 (t,  $J = 12.5$  Hz, 1H), 2.69 (d,  $J = 16.1$  Hz, 1H), 2.31 (dd,  $J = 32.9, 11.9$  Hz, 2H), 1.56 (s, 9H).  $^{13}\text{C}$

$\text{NMR}$  (100 MHz,  $\text{CDCl}_3$ )  $\delta$  152.41, 143.19, 139.10, 135.30, 128.32, 128.10, 127.27, 127.02, 82.17, 48.45, 30.90, 28.24, 23.89. **IR** (KBr,  $\text{cm}^{-1}$ )  $\gamma$  3441, 2979, 1703, 1607, 1562, 1531, 1475, 1392, 1368, 1265, 1147, 1066, 1012, 746; **HRMS** (ESI)  $m/z$  ( $\text{M}+\text{Na}$ ) $^+$ : calculated for  $\text{C}_{15}\text{H}_{18}\text{Cl}_2\text{N}_2\text{O}_2\text{Na}$ : 351.0643, found: 351.0633.

***tert*-butyl 2-(5-bromo-2-chloro-3,4-dihydronaphthalen-1(2*H*)-ylidene)hydrazine-1-carboxylate (1j)**

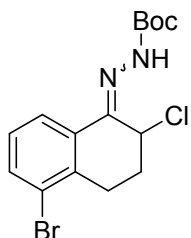

White solid;  $^1\text{H NMR}$  (400 MHz,  $\text{CDCl}_3$ )  $\delta$  8.29 – 8.18 (m, 2H), 7.55 (dd,  $J = 7.8, 1.0$  Hz, 1H), 7.11 (t,  $J = 8.0$  Hz, 1H), 5.04 (t,  $J = 3.3$  Hz, 1H), 3.21 – 2.92 (m, 2H), 2.40 (ddd,  $J = 14.7, 7.0, 3.3$  Hz, 1H), 2.30 – 2.14 (m, 1H), 1.57 (s, 9H).  $^{13}\text{C}$  **NMR**

(100 MHz,  $\text{CDCl}_3$ )  $\delta$  152.31, 143.30, 136.72, 133.39, 131.96, 127.84, 124.77, 124.40, 82.24, 47.86, 30.43, 28.23, 24.13. **IR** (KBr,  $\text{cm}^{-1}$ )  $\gamma$  3231, 2979, 1700, 1525, 1494, 1454, 1392, 1368, 1249, 1149, 1063, 740; **HRMS** (ESI)  $m/z$  ( $\text{M}+\text{Na}$ ) $^+$ : calculated for  $\text{C}_{15}\text{H}_{18}\text{BrClN}_2\text{O}_2\text{Na}$ : 395.0138, found: 395.0133.

**tert-butyl 2-(2-chloro-5-methoxy-3,4-dihydronaphthalen-1(2H)-ylidene)hydrazine-1-carboxylate (1k)**

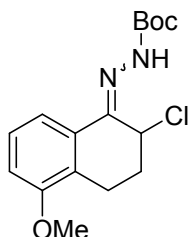

White solid;  $^1\text{H NMR}$  (400 MHz,  $\text{CDCl}_3$ )  $\delta$  8.25 (s, 1H), 7.86 (d,  $J = 8.0$  Hz, 1H), 7.19 (t,  $J = 8.1$  Hz, 1H), 6.82 (d,  $J = 8.0$  Hz, 1H), 5.04 (t,  $J = 3.2$  Hz, 1H), 3.84 (s, 3H), 3.10 – 2.97 (m, 1H), 2.91 – 2.76 (m, 1H), 2.36 (ddd,  $J = 14.6, 7.0, 3.1$  Hz, 1H), 2.17 (ddt,  $J = 16.8, 12.4, 4.2$  Hz, 1H), 1.56 (s, 9H).  $^{13}\text{C NMR}$  (100 MHz,  $\text{CDCl}_3$ )  $\delta$  156.32, 152.53, 144.30, 130.60, 126.88, 126.86, 117.50, 110.44, 81.91, 55.50, 48.35, 30.39, 28.25, 16.85. **IR** (KBr,  $\text{cm}^{-1}$ )  $\gamma$  3210, 2960, 1732, 1705, 1537, 1470, 1438, 1368, 1261, 1148, 1019, 851, 790, 745; **HRMS** (ESI)  $m/z$  ( $\text{M}+\text{Na}$ ) $^+$ : calculated for  $\text{C}_{16}\text{H}_{21}\text{ClN}_2\text{O}_3\text{Na}$ : 347.1138, found: 347.1130.

**tert-butyl (4R,4aR)-3-oxo-4-phenyl-4,4a,5,6-tetrahydrobenzo[h]cinnoline-2(3H)-carboxylate (3aa)**

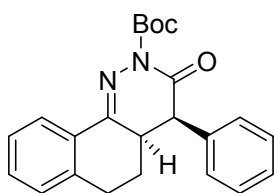

White solid; yield: 95%; *d.r.*: > 95:5;  $^1\text{H NMR}$  (400 MHz,  $\text{CDCl}_3$ )  $\delta$  8.34 – 8.24 (m, 1H), 7.35 – 7.19 (m, 5H), 7.19 – 7.04 (m, 3H), 3.88 (d,  $J = 7.0$  Hz, 1H), 3.25 (ddd,  $J = 12.4, 6.9, 5.3$  Hz, 1H), 2.86 – 2.68 (m, 2H), 2.01 – 1.89 (m, 1H), 1.62 (s, 9H), 1.48 – 1.36 (m, 1H).  $^{13}\text{C NMR}$  (100 MHz,  $\text{CDCl}_3$ )  $\delta$  167.10, 151.62, 150.61, 140.02, 134.47, 130.48, 130.33, 129.05, 128.80, 128.53, 128.02, 126.92, 125.31, 84.47, 50.33, 38.44, 28.94, 27.98, 24.67. **IR** (KBr,  $\text{cm}^{-1}$ )  $\gamma$  2981, 2935, 1772, 1721, 1454, 1369, 1309, 1272, 1249, 1151, 1093, 767, 736, 701; **HRMS** (ESI)  $m/z$  ( $\text{M}+\text{Na}$ ) $^+$ : calculated for  $\text{C}_{23}\text{H}_{24}\text{N}_2\text{O}_3\text{Na}$ : 399.1685, found: 399.1677;  $[\alpha]_D^{20} = +266.1$  ( $c = 0.31$ ,  $\text{CHCl}_3$ ); The product was analyzed by HPLC to determine the enantiomeric excess: > 99% *ee* (CHIRALPAK AD-H, hexane/*i*-PrOH = 70/30, flow rate: 1.0 mL/min,  $T = 30$  °C, 254 nm),  $t_R$  (major) = 5.808 min,  $t_R$  (minor) = 11.550 min.

**tert-butyl (4R,4aR)-4-(4-bromophenyl)-3-oxo-4,4a,5,6-tetrahydrobenzo[h]cinnoline-2(3H)-carboxylate (3ab)**

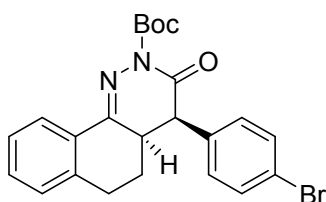

White solid; yield: 99%; *d.r.*: 93:7;  $^1\text{H NMR}$  (400 MHz,  $\text{CDCl}_3$ )  $\delta$  8.27 (dd,  $J = 7.7, 1.6$  Hz, 1H), 7.39 – 7.34 (m, 2H), 7.33 – 7.22 (m, 2H), 7.11 (dd,  $J = 7.2, 1.2$  Hz, 1H), 7.05 – 6.95 (m, 2H), 3.85 (d,  $J = 6.9$  Hz, 1H),

3.25 (ddd,  $J = 12.4, 6.8, 5.3$  Hz, 1H), 2.79 (dd,  $J = 8.4, 3.3$  Hz, 2H), 2.01 – 1.86 (m, 1H), 1.62 (s, 9H), 1.44 – 1.29 (m, 1H).  $^{13}\text{C NMR}$  (100 MHz,  $\text{CDCl}_3$ )  $\delta$  166.41, 151.41, 150.43, 139.91, 133.42, 132.16, 130.62, 130.40, 130.07, 128.53, 126.97, 125.23, 122.20, 84.61, 49.71, 38.23, 28.84, 27.93, 24.63. **IR** (KBr,  $\text{cm}^{-1}$ )  $\gamma$  2981, 2936, 1772, 1721, 1489, 1370, 1306, 1272, 1250, 1151, 1011, 774, 755, 734; **HRMS** (ESI)  $m/z$  ( $\text{M}+\text{Na}$ ) $^+$ : calculated for  $\text{C}_{23}\text{H}_{23}\text{BrN}_2\text{O}_3\text{Na}$ : 477.0790, found: 477.0789;  $[\alpha]^{20}_{\text{D}} = +151.3$  ( $c = 0.64$ ,  $\text{CHCl}_3$ ); The product was analyzed by HPLC to determine the enantiomeric excess: > 99% *ee* (CHIRALPAK AD-H, hexane/*i*-PrOH = 70/30, flow rate: 1.0 mL/min,  $T = 30$  °C, 254 nm),  $t_{\text{R}}$  (major) = 5.575 min,  $t_{\text{R}}$  (minor) = 12.834 min.

***tert*-butyl (4*R*,4*aR*)-3-oxo-4-(4-(trifluoromethyl)phenyl)-4,4*a*,5,6-tetrahydrobenzo[*h*]cinnoline-2(3*H*)-carboxylate (3ac)**

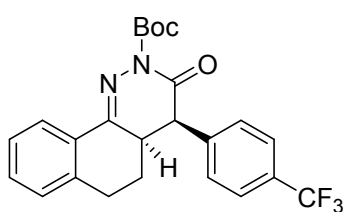

White solid; yield: 74%; *d.r.*: > 95:5;  $^1\text{H NMR}$  (400 MHz,  $\text{CDCl}_3$ )  $\delta$  8.29 (dd,  $J = 7.6, 1.6$  Hz, 1H), 7.51 (d,  $J = 8.2$  Hz, 2H), 7.38 – 7.23 (m, 4H), 7.12 (dd,  $J = 7.2, 1.2$  Hz, 1H), 3.96 (d,  $J = 7.0$  Hz, 1H), 3.30 (ddd,  $J = 12.5, 6.9, 5.3$  Hz, 1H), 2.86 – 2.80 (m, 2H), 1.97 (ddd,  $J = 8.9, 4.3, 2.5$  Hz, 1H), 1.62 (s, 9H), 1.47 – 1.24 (m, 1H).  $^{13}\text{C NMR}$  (100 MHz,  $\text{CDCl}_3$ )  $\delta$  158.78 (d,  $J = 1488.0$  Hz), 150.39, 139.92, 138.50, 130.76, 130.33 (d,  $J = 32.7$  Hz), 130.00, 129.84, 129.23, 128.62, 127.08, 126.03 (q,  $J = 3.7$  Hz), 125.30, 123.82 (d,  $J = 272.3$  Hz), 84.79, 50.10, 38.27, 28.87, 27.95, 24.71. **IR** (KBr,  $\text{cm}^{-1}$ )  $\gamma$  2981, 2935, 1773, 1721, 1370, 1326, 1273, 1250, 1152, 1124, 1071, 1018, 849, 832, 764, 732; **HRMS** (ESI)  $m/z$  ( $\text{M}+\text{Na}$ ) $^+$ : calculated for  $\text{C}_{24}\text{H}_{23}\text{F}_3\text{N}_2\text{O}_3\text{Na}$ : 467.1558, found: 467.1561;  $[\alpha]^{20}_{\text{D}} = +179.0$  ( $c = 0.59$ ,  $\text{CHCl}_3$ ); The product was analyzed by HPLC to determine the enantiomeric excess: > 99% *ee* (CHIRALPAK AD-H, hexane/*i*-PrOH = 70/30, flow rate: 1.0 mL/min,  $T = 30$  °C, 254 nm),  $t_{\text{R}}$  (major) = 4.357 min,  $t_{\text{R}}$  (minor) = 9.197 min.

***tert*-butyl (4*R*,4*aR*)-3-oxo-4-(*p*-tolyl)-4,4*a*,5,6-tetrahydrobenzo[*h*]cinnoline-2(3*H*)-carboxylate (3ad)**

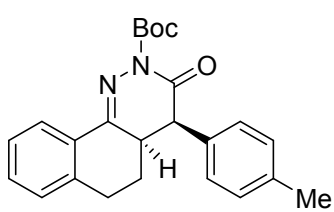

White solid; yield: 98%; *d.r.*: > 95:5;  $^1\text{H NMR}$  (400 MHz,  $\text{CDCl}_3$ )  $\delta$  8.34 – 8.23 (m, 1H), 7.28 (ddd,  $J = 6.6, 4.1, 2.1$  Hz, 2H), 7.09 (dd,  $J = 7.0, 1.6$  Hz, 1H), 7.06 – 6.97 (m, 4H), 3.84 (d,  $J = 6.9$  Hz, 1H), 3.26 – 3.19 (m, 1H), 2.77 (dd,  $J = 6.8, 3.4$  Hz, 2H), 2.24 (s, 3H), 1.97 – 1.82 (m, 1H),

1.61 (s, 9H), 1.52 – 1.33 (m, 1H).  $^{13}\text{C}$  NMR (100 MHz,  $\text{CDCl}_3$ )  $\delta$  167.21, 151.60, 150.64, 140.00, 137.70, 131.37, 130.37, 130.36, 129.67, 128.60, 128.47, 126.84, 125.25, 84.33, 49.92, 38.44, 28.92, 27.95, 24.62, 20.97. IR (KBr,  $\text{cm}^{-1}$ )  $\nu$  2980, 2934, 1773, 1722, 1514, 1456, 1369, 1309, 1272, 1249, 1152, 1123, 1092, 850, 769, 752, 734; HRMS (ESI)  $m/z$  ( $\text{M}+\text{Na}$ ) $^+$ : calculated for  $\text{C}_{24}\text{H}_{26}\text{N}_2\text{O}_3\text{Na}$ : 413.1841, found: 413.1835;  $[\alpha]_D^{20} = +195.8$  ( $c = 0.72$ ,  $\text{CHCl}_3$ ); The product was analyzed by HPLC to determine the enantiomeric excess:  $> 99\%$  *ee* (CHIRALPAK AD-H, hexane/*i*-PrOH = 70/30, flow rate: 1.0 mL/min,  $T = 30^\circ\text{C}$ , 254 nm),  $t_R$  (major) = 5.626 min,  $t_R$  (minor) = 10.775 min.

***tert*-butyl (4*R*,4*aR*)-4-([1,1'-biphenyl]-4-yl)-3-oxo-4,4*a*,5,6-tetrahydrobenzo[*h*]cinnoline-2(3*H*)-carboxylate (3ae)**

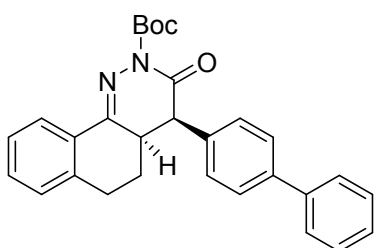

White solid; yield: 80%; *d.r.*:  $> 95:5$ ;  $^1\text{H}$  NMR (400 MHz,  $\text{CDCl}_3$ )  $\delta$  8.40 – 8.28 (m, 1H), 7.48 (ddt,  $J = 10.4, 8.6, 1.7$  Hz, 4H), 7.43 – 7.37 (m, 2H), 7.32 (ddd,  $J = 9.1, 5.0, 2.5$  Hz, 3H), 7.24 – 7.20 (m, 2H), 7.14 – 7.09 (m, 1H), 3.94 (d,  $J = 6.9$  Hz, 1H), 3.27 (ddd,  $J = 12.4, 6.8, 5.3$  Hz, 1H), 2.92 – 2.69 (m, 2H), 1.97 (ddd,  $J = 12.5, 8.7, 3.5$  Hz, 1H), 1.64 (s, 9H), 1.54 – 1.37 (m, 1H).  $^{13}\text{C}$  NMR (100 MHz,  $\text{CDCl}_3$ )  $\delta$  167.15, 151.77, 150.78, 141.00, 140.44, 140.17, 133.60, 130.65, 130.47, 129.34, 128.90, 128.70, 127.85, 127.57, 127.10, 127.07, 125.45, 84.62, 50.16, 38.60, 29.10, 28.14, 24.85. IR (KBr,  $\text{cm}^{-1}$ )  $\nu$  2981, 2935, 1772, 1721, 1487, 1369, 1307, 1272, 1249, 1151, 1092, 849, 752, 735, 699; HRMS (ESI)  $m/z$  ( $\text{M}+\text{Na}$ ) $^+$ : calculated for  $\text{C}_{29}\text{H}_{28}\text{N}_2\text{O}_3\text{Na}$ : 475.1998, found: 475.1992;  $[\alpha]_D^{20} = +147.0$  ( $c = 0.98$ ,  $\text{CHCl}_3$ ); The product was analyzed by HPLC to determine the enantiomeric excess:  $> 99\%$  *ee* (CHIRALPAK AD-H, hexane/*i*-PrOH = 70/30, flow rate: 1.0 mL/min,  $T = 30^\circ\text{C}$ , 254 nm),  $t_R$  (major) = 6.027 min,  $t_R$  (minor) = 15.553 min.

***tert*-butyl (4*R*,4*aR*)-4-(4-methoxyphenyl)-3-oxo-4,4*a*,5,6-tetrahydrobenzo[*h*]cinnoline-2(3*H*)-carboxylate (3af)**

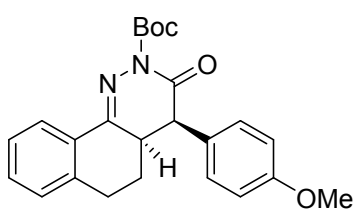

Yellow solid; yield: 99%; *d.r.*:  $> 95:5$ ;  $^1\text{H}$  NMR (400 MHz,  $\text{CDCl}_3$ )  $\delta$  8.28 (dd,  $J = 7.5, 1.8$  Hz, 1H), 7.33 – 7.21 (m, 2H), 7.12 – 7.08 (m, 1H), 7.06 – 6.98 (m, 2H), 6.81 – 6.71 (m, 2H), 3.82 (d,  $J = 6.9$  Hz, 1H), 3.71 (s, 3H), 3.21 (ddd,  $J = 12.4, 6.7, 5.3$  Hz, 1H), 2.89 – 2.65 (m, 2H), 1.91



(ddd,  $J = 12.6, 6.9, 3.6$  Hz, 1H), 1.61 (s, 9H), 1.43 (tdd,  $J = 12.9, 10.1, 7.3$  Hz, 1H).  $^{13}\text{C}$  NMR (100 MHz,  $\text{CDCl}_3$ )  $\delta$  167.33, 159.25, 151.68, 150.66, 140.07, 130.46, 130.36, 129.86, 128.54, 126.89, 126.45, 125.27, 114.41, 84.38, 55.19, 49.50, 38.52, 28.93, 27.98, 24.60. IR (KBr,  $\text{cm}^{-1}$ )  $\gamma$  2980, 2934, 1772, 1721, 1513, 1369, 1271, 1251, 1182, 1151, 1027, 851, 760; HRMS (ESI)  $m/z$  ( $\text{M}+\text{Na}^+$ ): calculated for  $\text{C}_{24}\text{H}_{26}\text{N}_2\text{O}_4\text{Na}$ : 429.1790, found: 429.1780;  $[\alpha]_D^{20} = +167.3$  ( $c = 0.95$ ,  $\text{CHCl}_3$ ); The product was analyzed by HPLC to determine the enantiomeric excess:  $> 99\%$  ee (CHIRALPAK AD-H, hexane/*i*-PrOH = 70/30, flow rate: 1.0 mL/min,  $T = 30$  °C, 254 nm),  $t_R$  (major) = 7.278 min,  $t_R$  (minor) = 16.553 min.

***tert*-butyl (4*R*,4*aR*)-4-(3-chlorophenyl)-3-oxo-4,4*a*,5,6-tetrahydrobenzo[*h*]cinnoline-2(3*H*)-carboxylate (3*ag*)**

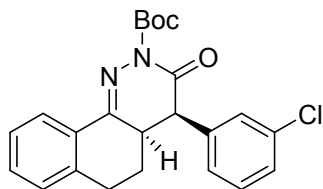

White solid; yield: 91%; *d.r.*: 92:8;  $^1\text{H}$  NMR (400 MHz,  $\text{CDCl}_3$ )  $\delta$  8.28 (dd,  $J = 7.6, 1.6$  Hz, 1H), 7.36 – 7.25 (m, 2H), 7.24 – 7.06 (m, 4H), 7.01 (dt,  $J = 7.3, 1.5$  Hz, 1H), 3.85 (d,  $J = 7.0$  Hz, 1H), 3.25 (ddd,  $J = 12.4, 6.9, 5.3$  Hz, 1H), 2.80 (dd,  $J = 8.4, 3.2$  Hz, 2H), 1.95 (ddt,  $J = 7.2, 5.0, 3.6$  Hz, 1H), 1.62 (s, 9H), 1.39 (tt,  $J = 12.9, 8.9$  Hz, 1H).  $^{13}\text{C}$  NMR (100 MHz,  $\text{CDCl}_3$ )  $\delta$  166.35, 151.50, 150.43, 139.95, 136.34, 134.75, 130.66, 130.40, 130.12, 129.31, 128.57, 128.35, 127.03, 126.55, 125.33, 84.68, 50.00, 38.30, 28.89, 27.96, 24.70. IR (KBr,  $\text{cm}^{-1}$ )  $\gamma$  2980, 2934, 1772, 1721, 1478, 1369, 1271, 1249, 1151, 1092, 847, 755; HRMS (ESI)  $m/z$  ( $\text{M}+\text{Na}^+$ ): calculated for  $\text{C}_{23}\text{H}_{23}\text{ClN}_2\text{O}_3\text{Na}$ : 433.1295, found: 433.1290;  $[\alpha]_D^{20} = +191.0$  ( $c = 0.56$ ,  $\text{CHCl}_3$ ); The product was analyzed by HPLC to determine the enantiomeric excess:  $> 99\%$  ee (CHIRALPAK AD-H, hexane/*i*-PrOH = 70/30, flow rate: 1.0 mL/min,  $T = 30$  °C, 254 nm),  $t_R$  (major) = 6.519 min,  $t_R$  (minor) = 12.632 min.

***tert*-butyl (4*R*,4*aR*)-3-oxo-4-(*m*-tolyl)-4,4*a*,5,6-tetrahydrobenzo[*h*]cinnoline-2(3*H*)-carboxylate (3*ah*)**

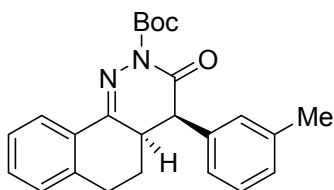

White solid; yield: 98%; *d.r.*:  $> 95:5$ ;  $^1\text{H}$  NMR (400 MHz,  $\text{CDCl}_3$ )  $\delta$  8.29 (dd,  $J = 7.4, 1.8$  Hz, 1H), 7.28 (ddd,  $J = 8.4, 5.0, 2.9$  Hz, 2H), 7.11 (dd,  $J = 8.7, 6.2$  Hz, 2H), 7.01 (d,  $J = 7.6$  Hz, 1H), 6.93 (d,  $J = 11.6$  Hz, 2H), 3.84 (d,  $J = 7.0$  Hz, 1H), 3.23 (ddd,  $J = 12.5, 6.9, 5.3$  Hz, 1H), 2.88

– 2.71 (m, 2H), 2.25 (s, 3H), 2.05 – 1.84 (m, 1H), 1.62 (s, 9H), 1.48 – 1.33 (m, 1H). <sup>13</sup>C NMR (100 MHz, CDCl<sub>3</sub>) δ 167.27, 151.81, 150.67, 140.05, 138.65, 134.41, 130.44, 130.40, 129.82, 128.93, 128.79, 128.52, 126.90, 125.50, 125.28, 84.40, 50.34, 38.38, 28.96, 27.99, 24.67, 21.47. IR (KBr, cm<sup>-1</sup>) γ 2980, 2934, 1773, 1721, 1369, 1306, 1271, 1249, 1151, 1092, 848, 749; HRMS (ESI) m/z (M+Na)<sup>+</sup>: calculated for C<sub>24</sub>H<sub>26</sub>N<sub>2</sub>O<sub>3</sub>Na: 413.1841, found: 413.1838; [α]<sup>20</sup><sub>D</sub> = + 192.8 (c = 0.92, CHCl<sub>3</sub>); The product was analyzed by HPLC to determine the enantiomeric excess: 99% ee (CHIRALPAK AD-H, hexane/*i*-PrOH = 70/30, flow rate: 1.0 mL/min, T = 30 °C, 254 nm), t<sub>R</sub> (major) = 5.607 min, t<sub>R</sub> (minor) = 10.344 min.

***tert*-butyl (4*R*,4*aR*)-4-(3-methoxyphenyl)-3-oxo-4,4*a*,5,6-tetrahydrobenzo[*h*]cinnoline-2(3*H*)-carboxylate (3*ai*)**

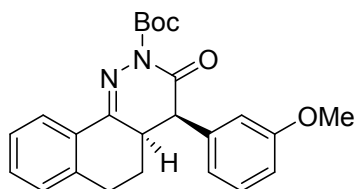

White solid; yield: 95%; *d.r.*: 95:5; <sup>1</sup>H NMR (400 MHz, CDCl<sub>3</sub>) δ 8.35 – 8.24 (m, 1H), 7.35 – 7.23 (m, 2H), 7.12 (dt, *J* = 8.4, 7.3 Hz, 2H), 6.80 – 6.64 (m, 3H), 3.84 (d, *J* = 7.0 Hz, 1H), 3.68 (s, 3H), 3.23 (ddd, *J* = 12.4, 6.8, 5.3 Hz, 1H), 2.86 – 2.69 (m, 2H), 1.93 (ddd, *J* = 12.5, 8.6, 3.5 Hz, 1H), 1.61 (s, 9H), 1.42 (tt, *J* = 12.9, 9.4 Hz, 1H). <sup>13</sup>C NMR (100 MHz, CDCl<sub>3</sub>) δ 166.95, 159.83, 151.72, 150.61, 140.05, 135.85, 130.48, 130.36, 130.04, 128.55, 126.92, 125.25, 121.02, 114.54, 113.42, 84.42, 55.11, 50.31, 38.39, 28.95, 27.98, 24.67. IR (KBr, cm<sup>-1</sup>) γ 2981, 2936, 1772, 1720, 1599, 1584, 1491, 1455, 1369, 1269, 1151, 1093, 848, 751; HRMS (ESI) m/z (M+Na)<sup>+</sup>: calculated for C<sub>24</sub>H<sub>26</sub>N<sub>2</sub>O<sub>4</sub>Na: 429.1790, found: 429.1784; [α]<sup>20</sup><sub>D</sub> = + 172.3 (c = 1.04, CHCl<sub>3</sub>); The product was analyzed by HPLC to determine the enantiomeric excess: > 99% ee (CHIRALPAK AD-H, hexane/*i*-PrOH = 70/30, flow rate: 1.0 mL/min, T = 30 °C, 254 nm), t<sub>R</sub> (major) = 6.833 min, t<sub>R</sub> (minor) = 16.082 min.

***tert*-butyl (4*R*,4*aR*)-4-(2-fluorophenyl)-3-oxo-4,4*a*,5,6-tetrahydrobenzo[*h*]cinnoline-2(3*H*)-carboxylate (3*aj*)**

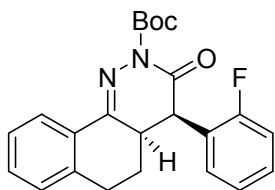

White solid; yield: 85%; *d.r.*: > 95:5; <sup>1</sup>H NMR (400 MHz, CDCl<sub>3</sub>) δ 8.25 (dd, *J* = 7.6, 1.6 Hz, 1H), 7.32 – 7.22 (m, 2H), 7.22 – 7.15 (m, 1H), 7.12 – 6.97 (m, 4H), 4.41 (d, *J* = 7.1 Hz, 1H), 3.28 (ddd, *J* = 12.5, 7.0, 5.3 Hz, 1H), 2.77 (dd, *J* = 7.4, 2.8 Hz, 2H), 2.16 – 2.03 (m, 1H), 1.63 (s, 9H), 1.41 – 1.27

(m, 1H).  $^{13}\text{C}$  NMR (100 MHz,  $\text{CDCl}_3$ )  $\delta$  166.72, 160.78 (d,  $J = 246.8$  Hz), 151.70, 150.53, 140.07, 130.53, 130.21, 129.65 (d,  $J = 8.4$  Hz), 128.70 (d,  $J = 2.9$  Hz), 128.49, 126.91, 125.28, 125.06 (d,  $J = 3.7$  Hz), 121.96 (d,  $J = 14.8$  Hz), 115.55 (d,  $J = 22.8$  Hz), 84.67, 41.62 (d,  $J = 3.2$  Hz), 38.59, 28.80, 27.98, 24.28. IR (KBr,  $\text{cm}^{-1}$ )  $\gamma$  2981, 2934, 1774, 1721, 1492, 1456, 1370, 1271, 1250, 1151, 1099, 849, 755, 734; HRMS (ESI)  $m/z$  ( $\text{M}+\text{Na}$ ) $^+$ : calculated for  $\text{C}_{23}\text{H}_{23}\text{FN}_2\text{O}_3\text{Na}$ : 417.1590, found: 417.1585;  $[\alpha]_D^{20} = +209.7$  ( $c = 0.26$ ,  $\text{CHCl}_3$ ); The product was analyzed by HPLC to determine the enantiomeric excess: 98% *ee* (CHIRALPAK OD-H, hexane/*i*-PrOH = 80/20, flow rate: 1.0 mL/min,  $T = 30$  °C, 254 nm),  $t_R$  (major) = 7.838 min,  $t_R$  (minor) = 10.303 min.

***tert*-butyl (4*R*,4*aR*)-3-oxo-4-(*o*-tolyl)-4,4*a*,5,6-tetrahydrobenzo[*h*]cinnoline-2(3*H*)-carboxylate (3ak)**

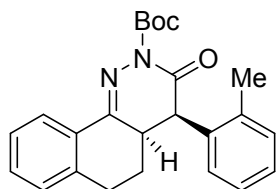

White solid; yield: 79%; *d.r.*: > 95:5;  $^1\text{H}$  NMR (400 MHz,  $\text{CDCl}_3$ )  $\delta$  8.39 – 8.25 (m, 1H), 7.34 – 7.27 (m, 2H), 7.15 (d,  $J = 7.5$  Hz, 1H), 7.11 – 7.05 (m, 2H), 7.04 – 6.98 (m, 2H), 4.32 (d,  $J = 7.5$  Hz, 1H), 3.31 (ddd,  $J = 12.8, 7.4, 5.3$  Hz, 1H), 2.86 – 2.70 (m, 2H), 2.45 (s, 3H), 1.99 – 1.88 (m, 1H), 1.61 (s, 9H), 1.48 – 1.35 (m, 1H).  $^{13}\text{C}$  NMR (100 MHz,  $\text{CDCl}_3$ )  $\delta$  167.60, 151.77, 150.76, 139.92, 137.24, 133.92, 130.95, 130.47, 130.39, 128.49, 127.71, 127.18, 127.11, 126.93, 125.36, 84.43, 44.75, 38.85, 28.89, 27.98, 24.00, 20.69. IR (KBr,  $\text{cm}^{-1}$ )  $\gamma$  2979, 2933, 1771, 1714, 1369, 1271, 1249, 1151, 849, 766, 743; HRMS (ESI)  $m/z$  ( $\text{M}+\text{Na}$ ) $^+$ : calculated for  $\text{C}_{24}\text{H}_{26}\text{N}_2\text{O}_3\text{Na}$ : 413.1841, found: 413.1835;  $[\alpha]_D^{20} = +181.4$  ( $c = 0.69$ ,  $\text{CHCl}_3$ ); The product was analyzed by HPLC to determine the enantiomeric excess: > 99% *ee* (CHIRALPAK AD-H, hexane/*i*-PrOH = 70/30, flow rate: 1.0 mL/min,  $T = 30$  °C, 254 nm),  $t_R$  (major) = 4.908 min,  $t_R$  (minor) = 9.827 min.

***tert*-butyl (4*R*,4*aR*)-4-(2-methoxyphenyl)-3-oxo-4,4*a*,5,6-tetrahydrobenzo[*h*]cinnoline-2(3*H*)-carboxylate (3al)**

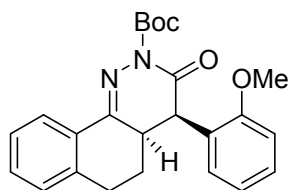

White solid; yield: 82%; *d.r.*: 95:5;  $^1\text{H}$  NMR (400 MHz,  $\text{CDCl}_3$ )  $\delta$  8.27 (dd,  $J = 7.4, 1.9$  Hz, 1H), 7.31 – 7.20 (m, 2H), 7.16 (td,  $J = 8.2, 1.6$  Hz, 1H), 7.11 – 7.04 (m, 1H), 7.00 (dd,  $J = 7.8, 1.6$  Hz, 1H), 6.87 – 6.72 (m, 2H), 4.57 (d,  $J = 7.7$  Hz, 1H), 3.77 (s, 3H), 3.23 (ddd,  $J = 12.8, 7.7, 5.2$  Hz, 1H), 2.73 (dd,  $J = 10.6, 4.3$  Hz, 2H), 2.10 – 1.97 (m, 1H), 1.62 (s, 9H), 1.35 – 1.16 (m, 1H).  $^{13}\text{C}$  NMR (100 MHz,

**CDCl<sub>3</sub>**)  $\delta$  168.31, 157.24, 152.08, 150.92, 140.11, 130.58, 130.22, 129.00, 128.95, 128.38, 126.77, 125.26, 123.76, 121.20, 110.70, 84.27, 55.46, 42.38, 38.71, 28.98, 28.00, 24.24. **IR** (KBr, cm<sup>-1</sup>)  $\gamma$  2980, 2935, 1772, 1716, 1494, 1460, 1369, 1271, 1248, 1151, 1110, 1024, 849, 755, 730; **HRMS** (ESI)  $m/z$  (M+Na)<sup>+</sup>: calculated for C<sub>24</sub>H<sub>26</sub>N<sub>2</sub>O<sub>4</sub>Na: 429.1790, found: 429.1788;  $[\alpha]_D^{20} = +226.6$  (c = 0.67, CHCl<sub>3</sub>); The product was analyzed by HPLC to determine the enantiomeric excess: > 99% *ee* (CHIRALPAK AD-H, hexane/*i*-PrOH = 70/30, flow rate: 1.0 mL/min, T = 30 °C, 254 nm),  $t_R$  (major) = 5.182 min,  $t_R$  (minor) = 8.966 min.

***tert*-butyl (4*R*,4*aR*)-4-(naphthalen-2-yl)-3-oxo-4,4*a*,5,6-tetrahydrobenzo[*h*]cinnoline-2(3*H*)-carboxylate (3am)**

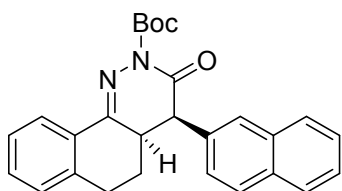

White solid; yield: 94%; *d.r.*: > 95:5; **<sup>1</sup>H NMR (400 MHz, CDCl<sub>3</sub>)**  $\delta$  8.40 – 8.29 (m, 1H), 7.79 – 7.69 (m, 3H), 7.63 (d, *J* = 1.4 Hz, 1H), 7.46 – 7.36 (m, 2H), 7.32 – 7.23 (m, 3H), 7.12 – 7.00 (m, 1H), 4.07 (d, *J* = 7.0 Hz, 1H), 3.31 (ddd, *J* = 12.5, 6.9, 5.3 Hz, 1H), 2.90 – 2.65 (m, 2H), 1.97 (ddd, *J* = 12.5, 8.6, 3.6 Hz, 1H), 1.64 (s, 9H), 1.50 – 1.36 (m, 1H). **<sup>13</sup>C NMR (100 MHz, CDCl<sub>3</sub>)**  $\delta$  167.10, 151.90, 150.69, 140.03, 133.31, 132.79, 132.04, 130.55, 130.28, 128.90, 128.55, 128.18, 128.00, 127.53, 126.95, 126.37, 126.29, 125.31, 84.54, 50.51, 38.53, 28.95, 28.01, 24.79. **IR** (KBr, cm<sup>-1</sup>)  $\gamma$  2980, 2934, 1771, 1720, 1369, 1271, 1248, 1151, 1092, 849, 755, 733; **HRMS** (ESI)  $m/z$  (M+Na)<sup>+</sup>: calculated for C<sub>27</sub>H<sub>26</sub>N<sub>2</sub>O<sub>3</sub>Na: 449.1841, found: 449.1832;  $[\alpha]_D^{20} = +144.9$  (c = 1.07, CHCl<sub>3</sub>); The product was analyzed by HPLC to determine the enantiomeric excess: > 99% *ee* (CHIRALPAK AD-H, hexane/*i*-PrOH = 70/30, flow rate: 1.0 mL/min, T = 30 °C, 254 nm),  $t_R$  (major) = 7.237 min,  $t_R$  (minor) = 16.740 min.

***tert*-butyl (4*R*,4*aR*)-3-oxo-4-(thiophen-3-yl)-4,4*a*,5,6-tetrahydrobenzo[*h*]cinnoline-2(3*H*)-carboxylate (3an)**

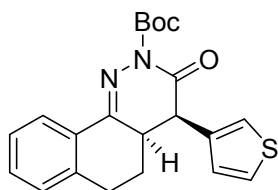

White solid; yield: 99%; *d.r.*: 95:5; **<sup>1</sup>H NMR (400 MHz, CDCl<sub>3</sub>)**  $\delta$  8.29 (dd, *J* = 7.6, 1.5 Hz, 1H), 7.35 – 7.23 (m, 2H), 7.20 (dd, *J* = 5.0, 3.0 Hz, 1H), 7.14 – 7.06 (m, 2H), 6.90 (dd, *J* = 5.0, 1.2 Hz, 1H), 4.02 (d, *J* = 6.3 Hz, 1H), 3.26 – 3.11 (m, 1H), 2.80 (dd, *J* = 8.5, 3.3 Hz, 2H), 1.94 (ddt, *J* = 12.6, 5.2, 3.6 Hz, 1H), 1.61 (s, 9H), 1.56 – 1.39 (m, 1H). **<sup>13</sup>C NMR (100 MHz, CDCl<sub>3</sub>)**  $\delta$  166.42, 151.79, 150.49,

140.07, 133.35, 130.56, 130.26, 128.62, 127.52, 126.98, 126.55, 125.24, 123.71, 84.42, 46.12, 38.33, 28.86, 27.98, 24.66. **IR** (KBr,  $\text{cm}^{-1}$ )  $\gamma$  2980, 2935, 1773, 1725, 1369, 1309, 1272, 1249, 1151, 1122, 1092, 846, 749, 734; **HRMS** (ESI)  $m/z$  ( $M+\text{Na}$ )<sup>+</sup>: calculated for  $\text{C}_{21}\text{H}_{22}\text{N}_2\text{O}_3\text{SNa}$ : 405.1249, found: 405.1236;  $[\alpha]_{\text{D}}^{20} = +224.0$  ( $c = 0.75$ ,  $\text{CHCl}_3$ ); The product was analyzed by HPLC to determine the enantiomeric excess: > 99% *ee* (CHIRALPAK AD-H, hexane/*i*-PrOH = 70/30, flow rate: 1.0 mL/min,  $T = 30$  °C, 254 nm),  $t_{\text{R}}$  (major) = 5.841 min,  $t_{\text{R}}$  (minor) = 11.326 min.

***tert*-butyl (4*R*,4*aR*)-4-(1*H*-indol-3-yl)-3-oxo-4,4*a*,5,6-tetrahydrobenzo[*h*]cinnoline-2(3*H*)-carboxylate (3a)**

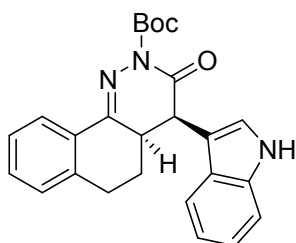

White solid; yield: 80%; *d.r.*: > 95:5; **<sup>1</sup>H NMR (400 MHz, CDCl<sub>3</sub>)**  $\delta$  8.64 (s, 1H), 8.20 (d,  $J = 7.3$  Hz, 1H), 7.67 (dd,  $J = 6.5, 2.3$  Hz, 1H), 7.33 (dd,  $J = 6.5, 2.2$  Hz, 1H), 7.24 (dd,  $J = 7.5, 1.2$  Hz, 1H), 7.18 – 7.11 (m, 3H), 7.05 (d,  $J = 7.5$  Hz, 1H), 6.90 (d,  $J = 2.5$  Hz, 1H), 4.25 (d,  $J = 5.8$  Hz, 1H), 3.27 (dt,  $J = 12.5, 5.5$  Hz, 1H), 2.90 – 2.56 (m, 2H), 2.24 – 1.88 (m, 1H), 1.70 – 1.62 (m, 1H), 1.60 (s, 9H). **<sup>13</sup>C NMR (100 MHz, CDCl<sub>3</sub>)**  $\delta$  167.30, 152.55, 151.05, 140.19, 135.65, 130.41, 130.26, 128.68, 127.73, 126.76, 125.04, 122.38, 121.99, 119.96, 118.68, 111.45, 107.72, 84.51, 41.36, 39.10, 28.81, 28.01, 24.55. **IR** (KBr,  $\text{cm}^{-1}$ )  $\gamma$  3338, 2980, 2931, 1765, 1732, 1458, 1370, 1309, 1277, 1251, 1151, 1092, 1029, 848, 758, 744; **HRMS** (ESI)  $m/z$  ( $M+\text{Na}$ )<sup>+</sup>: calculated for  $\text{C}_{25}\text{H}_{25}\text{N}_3\text{O}_3\text{Na}$ : 438.1794, found: 438.1790;  $[\alpha]_{\text{D}}^{20} = +267.2$  ( $c = 0.54$ ,  $\text{CHCl}_3$ ); The product was analyzed by HPLC to determine the enantiomeric excess: > 99% *ee* (CHIRALPAK AD-H, hexane/*i*-PrOH = 70/30, flow rate: 1.0 mL/min,  $T = 30$  °C, 254 nm),  $t_{\text{R}}$  (major) = 8.199 min,  $t_{\text{R}}$  (minor) = 34.141 min.

***tert*-butyl (4*S*,4*aR*)-3-oxo-4-((*E*)-styryl)-4,4*a*,5,6-tetrahydrobenzo[*h*]cinnoline-2(3*H*)-carboxylate (3ap)**

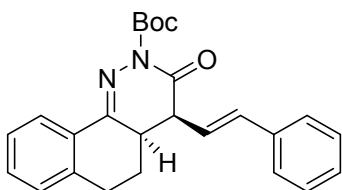

Yellow solid; yield: 79%; *d.r.*: > 95:5; **<sup>1</sup>H NMR (400 MHz, CDCl<sub>3</sub>)**  $\delta$  8.28 (dd,  $J = 7.7, 1.4$  Hz, 1H), 7.40 – 7.12 (m, 8H), 6.72 (d,  $J = 15.6$  Hz, 1H), 5.89 (dd,  $J = 15.6, 9.6$  Hz, 1H), 3.46 (dd,  $J = 9.5, 5.3$  Hz, 1H), 3.09 (dt,  $J = 12.7, 5.3$  Hz, 1H), 2.96 – 2.75 (m, 2H), 2.11 – 1.95 (m, 1H), 1.90 – 1.73 (m, 1H), 1.62 (s, 9H). **<sup>13</sup>C NMR (100 MHz, CDCl<sub>3</sub>)**  $\delta$  166.75, 151.36, 150.30, 140.12, 136.67,

135.92, 130.58, 130.21, 128.68, 128.55, 128.18, 126.97, 126.60, 125.30, 119.51, 84.34, 49.48, 37.79, 28.91, 27.99, 25.08. **IR** (KBr,  $\text{cm}^{-1}$ )  $\gamma$  2979, 2931, 1774, 1751, 1369, 1306, 1272, 1249, 1152, 1088, 966, 850, 758, 693; **HRMS** (ESI)  $m/z$  ( $M+\text{Na}$ )<sup>+</sup>: calculated for  $\text{C}_{25}\text{H}_{26}\text{N}_2\text{O}_3\text{Na}$ : 425.1841, found: 425.1842;  $[\alpha]_D^{20} = +85.6$  ( $c = 0.05$ ,  $\text{CHCl}_3$ ); The product was analyzed by HPLC to determine the enantiomeric excess: 90% *ee* (CHIRALPAK AD-H, hexane/*i*-PrOH = 70/30, flow rate: 1.0 mL/min,  $T = 30^\circ\text{C}$ , 254 nm),  $t_R$  (major) = 5.531 min,  $t_R$  (minor) = 8.245 min.

***tert*-butyl (4*S*,4*aR*)-3-oxo-4-((*E*)-prop-1-en-1-yl)-4,4*a*,5,6-tetrahydrobenzo[*h*]cinnoline-2(3*H*)-carboxylate (3*aq*)**

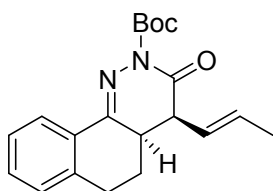

Yellow solid; yield: 99%; *d.r.*: 89:11; **<sup>1</sup>H NMR (400 MHz,  $\text{CDCl}_3$ )**  $\delta$  8.24 (dd,  $J = 7.8$ , 1.2 Hz, 1H), 7.39 – 7.24 (m, 2H), 7.17 (d,  $J = 7.4$  Hz, 1H), 5.81 (dq,  $J = 13.2$ , 6.5 Hz, 1H), 5.28 – 5.10 (m, 1H), 3.23 (dd,  $J = 9.3$ , 5.3 Hz, 1H), 3.02 – 2.87 (m, 2H), 2.85 – 2.71 (m, 1H), 1.92 (dtd,  $J = 7.2$ , 5.4, 4.0 Hz, 1H), 1.79 (qd,  $J = 12.9$ , 4.3 Hz, 1H), 1.62 (dd,  $J = 6.6$ , 1.6 Hz, 3H), 1.61 (s, 9H). **<sup>13</sup>C NMR (100 MHz,  $\text{CDCl}_3$ )**  $\delta$  167.52, 151.42, 150.40, 140.17, 133.08, 130.43, 130.36, 128.62, 126.90, 125.23, 121.22, 84.15, 48.96, 37.53, 28.91, 27.99, 24.80, 18.13. **IR** (KBr,  $\text{cm}^{-1}$ )  $\gamma$  2978, 2935, 1775, 1749, 1454, 1369, 1306, 1271, 1248, 1153, 1090, 965, 850, 769, 751, 735; **HRMS** (ESI)  $m/z$  ( $M+\text{Na}$ )<sup>+</sup>: calculated for  $\text{C}_{20}\text{H}_{24}\text{N}_2\text{O}_3\text{Na}$ : 363.1685, found: 363.1676;  $[\alpha]_D^{20} = +142.4$  ( $c = 0.51$ ,  $\text{CHCl}_3$ ); The product was analyzed by HPLC to determine the enantiomeric excess: > 99% *ee* (CHIRALPAK AD-H, hexane/*i*-PrOH = 70/30, flow rate: 1.0 mL/min,  $T = 30^\circ\text{C}$ , 254 nm),  $t_R$  (major) = 4.430 min,  $t_R$  (minor) = 5.492 min.

***tert*-butyl (4*S*,4*aR*)-4-((*E*)-but-1-en-1-yl)-3-oxo-4,4*a*,5,6-tetrahydrobenzo[*h*]cinnoline-2(3*H*)-carboxylate (3*ar*)**

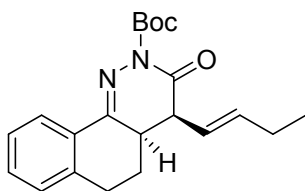

Yellow solid; yield: 92%; *d.r.*: 88:12; **<sup>1</sup>H NMR (400 MHz,  $\text{CDCl}_3$ )**  $\delta$  8.24 (dd,  $J = 7.8$ , 1.2 Hz, 1H), 7.40 – 7.22 (m, 2H), 7.17 (d,  $J = 7.4$  Hz, 1H), 5.84 (dt,  $J = 15.0$ , 6.4 Hz, 1H), 5.25 – 5.04 (m, 1H), 3.23 (dd,  $J = 9.3$ , 5.3 Hz, 1H), 3.02 – 2.91 (m, 1H), 2.88 (t,  $J = 3.5$  Hz, 1H), 2.85 – 2.75 (m, 1H), 2.03 – 1.88 (m, 3H), 1.78 (qd,  $J = 13.0$ , 4.3 Hz, 1H), 1.61 (s, 9H), 0.90 (t,  $J = 7.5$  Hz, 3H). **<sup>13</sup>C NMR (100 MHz,  $\text{CDCl}_3$ )**  $\delta$  167.57, 151.44, 150.41, 140.17, 140.02, 130.42, 130.38, 128.62, 126.89,

125.23, 119.02, 84.13, 48.97, 37.55, 28.92, 27.99, 25.71, 24.75, 13.34. **IR** (KBr,  $\text{cm}^{-1}$ )  $\gamma$  2977, 2934, 1775, 1751, 1456, 1369, 1308, 1271, 1249, 1153, 1090, 967, 850, 756, 735; **HRMS** (ESI)  $m/z$  ( $\text{M}+\text{Na}^+$ ): calculated for  $\text{C}_{21}\text{H}_{26}\text{N}_2\text{O}_3\text{Na}$ : 377.1841, found: 377.1837;  $[\alpha]^{20}_{\text{D}} = +143.9$  ( $c = 0.56$ ,  $\text{CHCl}_3$ ); The product was analyzed by HPLC to determine the enantiomeric excess:  $> 99\%$  *ee* (CHIRALPAK AD-H, hexane/*i*-PrOH = 70/30, flow rate: 1.0 mL/min,  $T = 30\text{ }^\circ\text{C}$ , 254 nm),  $t_{\text{R}}$  (major) = 4.208 min,  $t_{\text{R}}$  (minor) = 5.321 min.

***tert*-butyl (4*R*,4*aR*)-9-fluoro-3-oxo-4-phenyl-4,4*a*,5,6-tetrahydrobenzo[*h*]cinnoline-2(3*H*)-carboxylate (3*da*)**

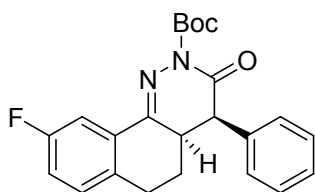

White solid; yield: 96%; *d.r.*: 94:6;  **$^1\text{H}$  NMR (400 MHz,  $\text{CDCl}_3$ )**  $\delta$  7.95 (dd,  $J = 9.9, 2.7$  Hz, 1H), 7.29 – 7.19 (m, 3H), 7.16 – 7.04 (m, 3H), 7.00 (td,  $J = 8.3, 2.7$  Hz, 1H), 3.88 (d,  $J = 7.0$  Hz, 1H), 3.22 (ddd,  $J = 12.5, 6.9, 5.3$  Hz, 1H), 2.86 – 2.65 (m, 2H), 1.93 (ddd,  $J = 12.5, 8.6, 3.6$  Hz, 1H), 1.62 (s, 9H), 1.36 (ddd,  $J = 24.9, 12.8, 5.7$  Hz, 1H).  **$^{13}\text{C}$  NMR (100 MHz,  $\text{CDCl}_3$ )**  $\delta$  166.78, 161.64 (d,  $J = 244.7$  Hz), 150.61 (d,  $J = 2.8$  Hz), 150.40, 135.72 (d,  $J = 2.9$  Hz), 134.29, 132.05 (d,  $J = 7.8$  Hz), 130.15 (d,  $J = 7.7$  Hz), 129.11, 128.71, 128.13, 117.81 (d,  $J = 22.2$  Hz), 111.36 (d,  $J = 23.1$  Hz), 84.66, 50.13, 38.11, 28.22, 27.96, 24.70. **IR** (KBr,  $\text{cm}^{-1}$ )  $\gamma$  2981, 2935, 1774, 1723, 1581, 1490, 1454, 1441, 1370, 1267, 1197, 1150, 1093, 885, 850, 744, 701; **HRMS** (ESI)  $m/z$  ( $\text{M}+\text{Na}^+$ ): calculated for  $\text{C}_{23}\text{H}_{23}\text{FN}_2\text{O}_3\text{Na}$ : 417.1590, found: 417.1586;  $[\alpha]^{20}_{\text{D}} = +195.2$  ( $c = 0.59$ ,  $\text{CHCl}_3$ ); The product was analyzed by HPLC to determine the enantiomeric excess:  $> 99\%$  *ee* (CHIRALPAK AD-H, hexane/*i*-PrOH = 70/30, flow rate: 1.0 mL/min,  $T = 30\text{ }^\circ\text{C}$ , 254 nm),  $t_{\text{R}}$  (major) = 5.985 min,  $t_{\text{R}}$  (minor) = 12.425 min.

***tert*-butyl (4*R*,4*aR*)-9-chloro-3-oxo-4-phenyl-4,4*a*,5,6-tetrahydrobenzo[*h*]cinnoline-2(3*H*)-carboxylate (3*ea*)**

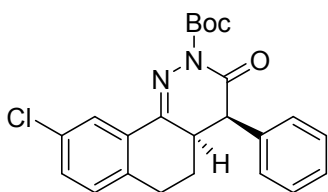

White solid; yield: 93%; *d.r.*:  $> 95:5$ ;  **$^1\text{H}$  NMR (400 MHz,  $\text{CDCl}_3$ )**  $\delta$  8.28 (d,  $J = 2.2$  Hz, 1H), 7.32 – 7.22 (m, 4H), 7.16 – 7.10 (m, 2H), 7.06 (d,  $J = 8.2$  Hz, 1H), 3.90 (d,  $J = 7.0$  Hz, 1H), 3.25 (ddd,  $J = 12.5, 6.9, 5.3$  Hz, 1H), 2.88 – 2.69 (m, 2H), 2.03 – 1.87 (m, 1H), 1.65 (s, 9H), 1.37 (tdd,  $J = 12.9, 10.7, 6.8$  Hz, 1H).  **$^{13}\text{C}$  NMR (100 MHz,  $\text{CDCl}_3$ )**  $\delta$  166.76, 150.47, 150.39, 138.27, 134.26,

132.87, 131.82, 130.43, 129.97, 129.14, 128.69, 128.15, 124.96, 84.74, 50.10, 38.19, 28.38, 27.96, 24.48. **IR** (KBr,  $\text{cm}^{-1}$ )  $\gamma$  2981, 2935, 1774, 1723, 1477, 1454, 1370, 1281, 1263, 1248, 1151, 1090, 847, 827, 737, 700; **HRMS** (ESI)  $m/z$  ( $M+\text{Na}$ )<sup>+</sup>: calculated for  $\text{C}_{23}\text{H}_{23}\text{ClN}_2\text{O}_3\text{Na}$ : 433.1295, found: 433.1289;  $[\alpha]_D^{20} = +216.6$  ( $c = 1.01$ ,  $\text{CHCl}_3$ ); The product was analyzed by HPLC to determine the enantiomeric excess: > 99% *ee* (CHIRALPAK AD-H, hexane/*i*-PrOH = 70/30, flow rate: 1.0 mL/min,  $T = 30\text{ }^\circ\text{C}$ , 254 nm),  $t_R$  (major) = 5.951 min,  $t_R$  (minor) = 11.805 min.

***tert*-butyl (4*R*,4*aR*)-9-bromo-3-oxo-4-phenyl-4,4*a*,5,6-tetrahydrobenzo[*h*]cinnoline-2(3*H*)-carboxylate (3fa)**

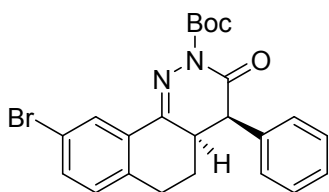

White solid; yield: 76%; *d.r.*: 94:6; **<sup>1</sup>H NMR (400 MHz,  $\text{CDCl}_3$ )**  $\delta$  8.41 (d,  $J = 2.1$  Hz, 1H), 7.39 (dd,  $J = 8.2, 2.1$  Hz, 1H), 7.32 – 7.18 (m, 3H), 7.14 – 7.06 (m, 2H), 6.97 (d,  $J = 8.2$  Hz, 1H), 3.87 (d,  $J = 7.0$  Hz, 1H), 3.22 (ddd,  $J = 12.5, 6.9, 5.3$  Hz, 1H), 2.81 – 2.60 (m, 2H), 1.92 (tt,  $J = 5.0, 3.6$  Hz, 1H), 1.62 (s, 9H), 1.49 – 1.21 (m, 1H). **<sup>13</sup>C NMR (100 MHz,  $\text{CDCl}_3$ )**  $\delta$  166.75, 150.47, 150.26, 138.73, 134.24, 133.29, 132.15, 130.22, 129.16, 128.69, 128.16, 127.95, 120.82, 84.77, 50.10, 38.21, 28.46, 27.96, 24.41. **IR** (KBr,  $\text{cm}^{-1}$ )  $\gamma$  2980, 2934, 1773, 1723, 1475, 1454, 1369, 1248, 1151, 1095, 735, 700; **HRMS** (ESI)  $m/z$  ( $M+\text{Na}$ )<sup>+</sup>: calculated for  $\text{C}_{23}\text{H}_{23}\text{BrN}_2\text{O}_3\text{Na}$ : 477.0790, found: 470.0792;  $[\alpha]_D^{20} = +247.9$  ( $c = 0.61$ ,  $\text{CHCl}_3$ ); The product was analyzed by HPLC to determine the enantiomeric excess: > 99% *ee* (CHIRALPAK AD-H, hexane/*i*-PrOH = 70/30, flow rate: 1.0 mL/min,  $T = 30\text{ }^\circ\text{C}$ , 254 nm),  $t_R$  (major) = 6.117 min,  $t_R$  (minor) = 11.768 min.

***tert*-butyl (4*R*,4*aR*)-9-methyl-3-oxo-4-phenyl-4,4*a*,5,6-tetrahydrobenzo[*h*]cinnoline-2(3*H*)-carboxylate (3ga)**

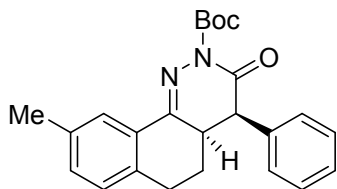

White solid; yield: 52%; *d.r.*: > 95:5; **<sup>1</sup>H NMR (400 MHz,  $\text{CDCl}_3$ )**  $\delta$  8.10 (s, 1H), 7.25 – 7.18 (m, 3H), 7.16 – 7.09 (m, 3H), 6.99 (d,  $J = 7.8$  Hz, 1H), 3.87 (d,  $J = 7.0$  Hz, 1H), 3.23 (ddd,  $J = 12.4, 6.9, 5.2$  Hz, 1H), 2.74 (dd,  $J = 8.3, 3.2$  Hz, 2H), 2.36 (s, 3H), 1.92 (ddd,  $J = 8.9, 4.4, 2.5$  Hz, 1H), 1.62 (s, 9H), 1.39 (ddd,  $J = 12.7, 10.6, 6.2$  Hz, 1H). **<sup>13</sup>C NMR (100 MHz,  $\text{CDCl}_3$ )**  $\delta$  167.21, 152.03, 150.76, 137.23, 136.53, 134.54, 131.56, 130.01, 129.04, 128.81, 128.41, 127.99, 125.40, 84.51, 50.40, 38.49, 28.56, 27.99, 24.80, 21.16. **IR** (KBr,  $\text{cm}^{-1}$ )  $\gamma$  2979, 2932, 1772, 1720, 1496,



1454, 1369, 1271, 1250, 1151, 1093, 850, 742, 701; **HRMS** (ESI)  $m/z$  (M+Na)<sup>+</sup>: calculated for C<sub>24</sub>H<sub>26</sub>N<sub>2</sub>O<sub>3</sub>Na: 413.1841, found: 413.1834;  $[\alpha]^{20}_D = +227.9$  (c = 0.39, CHCl<sub>3</sub>); The product was analyzed by HPLC to determine the enantiomeric excess: > 99% *ee* (CHIRALPAK AD-H, hexane/*i*-PrOH = 70/30, flow rate: 1.0 mL/min, T = 30 °C, 254 nm),  $t_R$  (major) = 5.066 min,  $t_R$  (minor) = 9.211 min.

***tert*-butyl (4*R*,4*aR*)-9-methoxy-3-oxo-4-phenyl-4,4*a*,5,6-tetrahydrobenzo[*h*]cinnoline-2(3*H*)-carboxylate (3*ha*)**

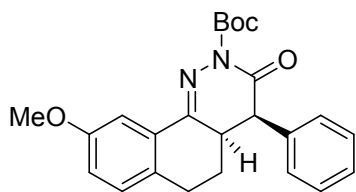

White solid; yield: 93%; *d.r.*: 92:8; **<sup>1</sup>H NMR** (400 MHz, CDCl<sub>3</sub>) δ 7.78 (d, *J* = 2.7 Hz, 1H), 7.31 – 7.18 (m, 3H), 7.16 – 7.09 (m, 2H), 7.01 (d, *J* = 8.4 Hz, 1H), 6.89 (dd, *J* = 8.4, 2.8 Hz, 1H), 3.88 (d, *J* = 7.0 Hz, 1H), 3.86 (s, 3H), 3.21 (ddd, *J* = 12.4, 6.9, 5.2 Hz, 1H), 2.75 – 2.67 (m, 2H), 1.90 (ddd, *J* = 12.4, 8.6, 3.5 Hz, 1H), 1.62 (s, 9H), 1.44 – 1.33 (m, 1H). **<sup>13</sup>C NMR** (100 MHz, CDCl<sub>3</sub>) δ 167.10, 158.39, 151.50, 150.46, 134.48, 132.73, 131.15, 129.66, 129.05, 128.79, 128.02, 118.50, 107.85, 84.36, 55.42, 50.35, 38.26, 28.12, 27.98, 24.89. **IR** (KBr, cm<sup>-1</sup>) γ 2980, 2934, 1773, 1721, 1494, 1454, 1369, 1272, 1252, 1151, 1093, 1035, 850, 740, 701; **HRMS** (ESI)  $m/z$  (M+Na)<sup>+</sup>: calculated for C<sub>24</sub>H<sub>26</sub>N<sub>2</sub>O<sub>4</sub>Na: 429.1790, found: 429.1783;  $[\alpha]^{20}_D = +191.7$  (c = 0.78, CHCl<sub>3</sub>); The product was analyzed by HPLC to determine the enantiomeric excess: > 99% *ee* (CHIRALPAK AD-H, hexane/*i*-PrOH = 70/30, flow rate: 1.0 mL/min, T = 30 °C, 254 nm),  $t_R$  (major) = 6.236 min,  $t_R$  (minor) = 12.717 min.

***tert*-butyl (4*R*,4*aR*)-8-chloro-3-oxo-4-phenyl-4,4*a*,5,6-tetrahydrobenzo[*h*]cinnoline-2(3*H*)-carboxylate (3*ia*)**

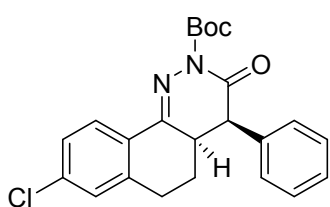

White solid; yield: 95%; *d.r.*: > 95:5; **<sup>1</sup>H NMR** (400 MHz, CDCl<sub>3</sub>) δ 8.22 (d, *J* = 8.6 Hz, 1H), 7.28 – 7.18 (m, 4H), 7.14 – 7.06 (m, 3H), 3.87 (d, *J* = 7.0 Hz, 1H), 3.23 (ddd, *J* = 12.5, 6.9, 5.3 Hz, 1H), 2.87 – 2.58 (m, 2H), 1.93 (ddd, *J* = 12.6, 6.9, 3.6 Hz, 1H), 1.61 (s, 9H), 1.37 (ddd, *J* = 24.7, 12.8, 5.7 Hz, 1H). **<sup>13</sup>C NMR** (100 MHz, CDCl<sub>3</sub>) δ 166.84, 150.71, 150.52, 141.54, 136.45, 134.29, 129.11, 128.88, 128.71, 128.38, 128.14, 127.34, 126.84, 84.64, 50.16, 38.20, 28.72, 27.96, 24.46. **IR** (KBr, cm<sup>-1</sup>) γ 2981, 2936, 1773, 1723, 1586, 1479, 1455, 1370, 1307, 1271, 1250, 1152, 1098, 843,

736, 700; **HRMS** (ESI)  $m/z$  ( $M+Na$ )<sup>+</sup>: calculated for  $C_{23}H_{23}ClN_2O_3Na$ : 433.1295, found: 433.1290;  $[\alpha]^{20}_D = +193.1$  ( $c = 0.90$ ,  $CHCl_3$ ); The product was analyzed by HPLC to determine the enantiomeric excess: > 99% *ee* (CHIRALPAK AD-H, hexane/*i*-PrOH = 70/30, flow rate: 1.0 mL/min,  $T = 30$  °C, 254 nm),  $t_R$  (major) = 7.056 min,  $t_R$  (minor) = 9.027 min.

***tert*-butyl (4*R*,4*aR*)-7-bromo-3-oxo-4-phenyl-4,4*a*,5,6-tetrahydrobenzo[*h*]cinnoline-2(3*H*)-carboxylate (3ja)**

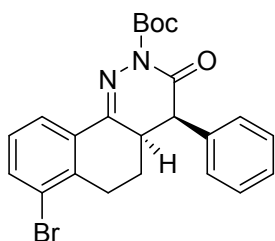

White solid; yield: 99%; *d.r.*: > 95:5; **<sup>1</sup>H NMR (400 MHz, CDCl<sub>3</sub>)**  $\delta$  8.29 (dd,  $J = 8.0, 0.9$  Hz, 1H), 7.57 (dd,  $J = 7.9, 1.1$  Hz, 1H), 7.32 – 7.18 (m, 3H), 7.19 – 7.08 (m, 3H), 3.89 (d,  $J = 7.0$  Hz, 1H), 3.23 (ddd,  $J = 12.6, 7.0, 5.3$  Hz, 1H), 3.16 (dt,  $J = 16.7, 3.5$  Hz, 1H), 2.64 – 2.51 (m, 1H), 1.94 (ddd,  $J = 12.7, 8.1, 4.3$  Hz, 1H), 1.61 (s, 9H), 1.34 (qd,  $J = 13.2, 4.1$  Hz, 1H). **<sup>13</sup>C NMR (100 MHz, CDCl<sub>3</sub>)**  $\delta$  166.71, 150.74, 150.48, 139.03, 134.35, 134.27, 132.59, 129.14, 128.72, 128.17, 127.91, 124.60, 124.59, 84.66, 50.05, 37.93, 28.73, 27.97, 24.03. **IR** (KBr,  $cm^{-1}$ )  $\nu$  2980, 2936, 1774, 1724, 1455, 1369, 1308, 1269, 1251, 1151, 1026, 848, 787, 742, 700; **HRMS** (ESI)  $m/z$  ( $M+Na$ )<sup>+</sup>: calculated for  $C_{23}H_{23}BrN_2O_3Na$ : 477.0790, found: 477.0786;  $[\alpha]^{20}_D = +129.2$  ( $c = 1.45$ ,  $CHCl_3$ ); The product was analyzed by HPLC to determine the enantiomeric excess: > 99% *ee* (CHIRALPAK AD-H, hexane/*i*-PrOH = 70/30, flow rate: 1.0 mL/min,  $T = 30$  °C, 254 nm),  $t_R$  (major) = 6.594 min,  $t_R$  (minor) = 13.773 min.

***tert*-butyl (4*R*,4*aR*)-7-methoxy-3-oxo-4-phenyl-4,4*a*,5,6-tetrahydrobenzo[*h*]cinnoline-2(3*H*)-carboxylate (3ka)**

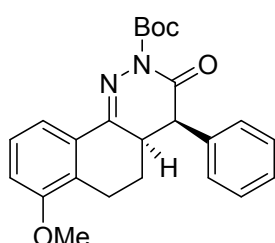

White solid; yield: 81%; *d.r.*: > 95:5; **<sup>1</sup>H NMR (400 MHz, CDCl<sub>3</sub>)**  $\delta$  7.97 – 7.82 (m, 1H), 7.32 – 7.17 (m, 4H), 7.18 – 7.09 (m, 2H), 6.85 (d,  $J = 7.6$  Hz, 1H), 3.87 (d,  $J = 7.0$  Hz, 1H), 3.79 (s, 3H), 3.22 (ddd,  $J = 12.5, 7.0, 5.2$  Hz, 1H), 3.14 (dt,  $J = 16.7, 3.6$  Hz, 1H), 2.44 – 2.27 (m, 1H), 1.98 – 1.82 (m, 1H), 1.61 (s, 9H), 1.30 (qd,  $J = 13.2, 4.1$  Hz, 1H). **<sup>13</sup>C NMR (100 MHz, CDCl<sub>3</sub>)**  $\delta$  167.04, 156.45, 151.59, 150.60, 134.55, 131.38, 129.27, 129.03, 128.81, 127.99, 126.98, 117.21, 111.36, 84.40, 55.54, 50.32, 38.01, 27.98, 24.01, 21.34. **IR** (KBr,  $cm^{-1}$ )  $\nu$  2980, 2936, 1773, 1720, 1577, 1472, 1455, 1370, 1305, 1263, 1151, 1058, 847, 739, 701; **HRMS** (ESI)  $m/z$  ( $M+Na$ )<sup>+</sup>:

calculated for C<sub>24</sub>H<sub>26</sub>N<sub>2</sub>O<sub>4</sub>Na: 429.1790, found: 429.1794;  $[\alpha]^{20}_{\text{D}} = + 156.2$  (c = 0.83, CHCl<sub>3</sub>); The product was analyzed by HPLC to determine the enantiomeric excess: > 99% *ee* (CHIRALPAK AD-H, hexane/*i*-PrOH = 70/30, flow rate: 1.0 mL/min, T = 30 °C, 254 nm),  $t_{\text{R}}$  (major) = 5.982 min,  $t_{\text{R}}$  (minor) = 13.684 min.

## 5. Synthetic Transformation of **3aa** and **3ap**

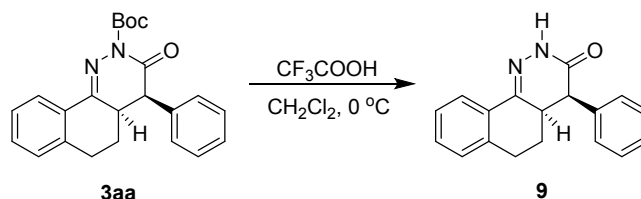

Under the optimal conditions, **3aa** was obtained in 95% yield, > 95:5 *d.r.* and > 99% *ee*. To a cooled (0 °C) solution of **3aa** (75.3 mg, 0.2 mmol) in CH<sub>2</sub>Cl<sub>2</sub> (2.0 mL), 4.0 equiv of CF<sub>3</sub>COOH (62 μL, 0.8 mmol) was added, and the corresponding mixture was stirred at this temperature until the reaction completed (monitoring by TLC). The solvent was removed under reduced pressure and the residue was purified by column chromatography on silica gel to afford the desired compound **9** (45.9 mg, 83% yield, > 95:5 *d.r.*, > 99% *ee*).

### (4*R*,4*aR*)-4-phenyl-4,4*a*,5,6-tetrahydrobenzo[*h*]cinnolin-3(2*H*)-one (**9**)

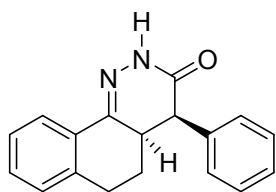

White solid; yield: 83%; *d.r.*: > 95:5; <sup>1</sup>H NMR (400 MHz, CDCl<sub>3</sub>) δ 8.87 (s, 1H), 8.29 – 7.93 (m, 1H), 7.38 – 7.04 (m, 8H), 3.78 (d, *J* = 7.4 Hz, 1H), 3.22 (ddd, *J* = 12.7, 7.4, 5.1 Hz, 1H), 2.87 – 2.61 (m, 2H), 1.94 (ddd, *J* = 12.4, 8.5, 3.6 Hz, 1H), 1.37 (tdd, *J* = 13.0, 10.6, 6.9 Hz, 1H). <sup>13</sup>C NMR (100 MHz, CDCl<sub>3</sub>) δ 168.82, 150.18, 139.60, 134.94, 130.64, 130.01, 129.02, 128.64, 128.56, 127.90, 126.83, 124.49, 48.03, 38.65, 29.26, 24.91. IR (KBr, cm<sup>-1</sup>) γ 3222, 2924, 2851, 1672, 1454, 1355, 1332, 1264, 1128, 1085, 765, 744, 702; HRMS (ESI) *m/z* (M+H)<sup>+</sup>: calculated for C<sub>18</sub>H<sub>17</sub>N<sub>2</sub>O: 277.1341, found: 277.1331;  $[\alpha]^{20}_{\text{D}} = + 426.8$  (c = 0.51, CHCl<sub>3</sub>); The product was analyzed by HPLC to determine the enantiomeric excess: > 99% *ee* (CHIRALPAK OD-H, hexane/*i*-PrOH = 70/30, flow rate: 1.0 mL/min, T = 30 °C, 254 nm),  $t_{\text{R}}$  (major) = 8.182 min,  $t_{\text{R}}$  (minor) = 13.424 min.

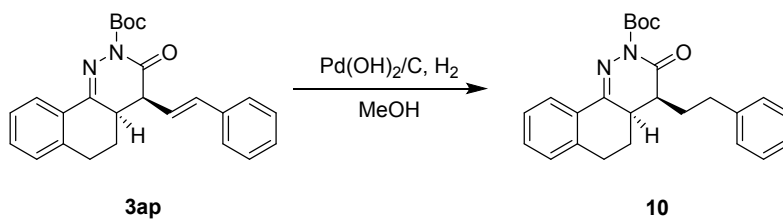

Under the optimal conditions, **3ap** was obtained in 79% yield, > 95:5 *d.r.* and 90% *ee*. To a stirring solution of **3ap** (40.3 mg, 0.1 mmol) in MeOH (5.0 mL) was slowly added palladium hydroxide-on-activated charcoal (10%; 20 mg) at room temperature. The resulting mixture was stirred at room temperature in an atmosphere of hydrogen gas for 2 h. The mixture was filtered and concentrated under reduced pressure. The residue was purified by column chromatography on silica gel to give **10** (39.6 mg, 98% yield, > 95:5 *d.r.*, 90% *ee*).

**tert-butyl (4*S*,4*aR*)-3-oxo-4-phenethyl-4,4*a*,5,6-tetrahydrobenzo[*h*]cinnoline-2(3*H*)-carboxylate (10)**

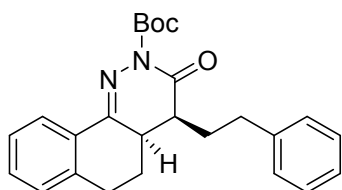

White solid; yield: 98%; *d.r.*: > 95:5;  $^1\text{H NMR}$  (400 MHz,  $\text{CDCl}_3$ )  $\delta$  8.19 (dd,  $J = 7.8, 1.4$  Hz, 1H), 7.37 – 7.21 (m, 4H), 7.19 – 7.13 (m, 4H), 3.20 – 2.97 (m, 1H), 2.95 – 2.86 (m, 1H), 2.82 – 2.61 (m, 4H), 1.95 – 1.78 (m, 3H), 1.75 – 1.65 (m, 1H), 1.63 (s, 9H).  $^{13}\text{C NMR}$  (100 MHz,

$\text{CDCl}_3$ )  $\delta$  169.14, 151.08, 150.63, 141.11, 139.96, 130.37, 128.51, 128.49, 128.42, 126.94, 126.10, 125.24, 84.09, 43.34, 38.26, 32.89, 29.22, 28.00, 27.18, 24.36. **IR** (KBr,  $\text{cm}^{-1}$ )  $\nu$  2980, 2931, 1771, 1455, 1369, 1271, 1249, 1152, 1096, 850, 756, 731, 701; **HRMS** (ESI)  $m/z$  ( $\text{M}+\text{Na}^+$ ): calculated for  $\text{C}_{25}\text{H}_{28}\text{N}_2\text{O}_3\text{Na}$ : 427.1998, found: 427.1991;  $[\alpha]^{20}_{\text{D}} = + 347.5$  ( $c = 0.05$ ,  $\text{CHCl}_3$ ); The product was analyzed by HPLC to determine the enantiomeric excess: 90% *ee* (CHIRALPAK OD-H, hexane/*i*-PrOH = 90/10, flow rate: 1.0 mL/min,  $T = 30$  °C, 254 nm),  $t_{\text{R}}$  (major) = 10.215 min,  $t_{\text{R}}$  (minor) = 11.356 min.

## 6. X-ray Single Crystal Data for 3ad

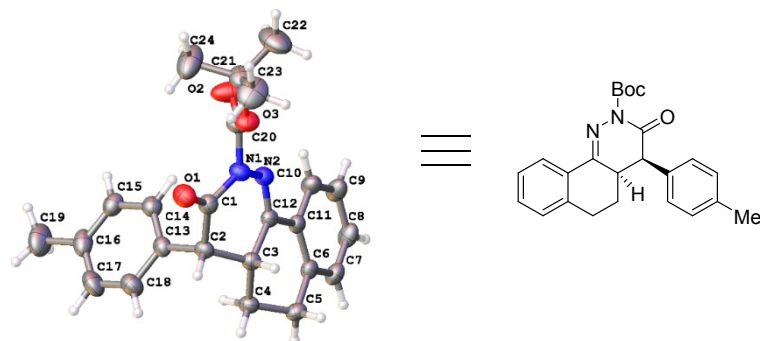

|                                             |                                                               |
|---------------------------------------------|---------------------------------------------------------------|
| Empirical formula                           | $C_{24}H_{26}N_2O_3$                                          |
| Formula weight                              | 390.47                                                        |
| Temperature/K                               | 170                                                           |
| Crystal system                              | monoclinic                                                    |
| Space group                                 | $P2_1$                                                        |
| a/Å                                         | 10.2146(4)                                                    |
| b/Å                                         | 11.7243(5)                                                    |
| c/Å                                         | 10.2644(4)                                                    |
| $\alpha$ /°                                 | 90                                                            |
| $\beta$ /°                                  | 119.315(2)                                                    |
| $\gamma$ /°                                 | 90                                                            |
| Volume/Å <sup>3</sup>                       | 1071.84(8)                                                    |
| Z                                           | 2                                                             |
| $\rho_{\text{calc}}/\text{cm}^3$            | 1.210                                                         |
| $\mu/\text{mm}^{-1}$                        | 0.412                                                         |
| F(000)                                      | 416.0                                                         |
| Crystal size/mm <sup>3</sup>                | 0.15 × 0.1 × 0.08                                             |
| Radiation                                   | GaK $\alpha$ ( $\lambda = 1.34139$ )                          |
| 2 $\theta$ range for data collection/°      | 8.638 to 121.776                                              |
| Index ranges                                | $-13 \leq h \leq 13, -15 \leq k \leq 15, -13 \leq l \leq 13$  |
| Reflections collected                       | 13110                                                         |
| Independent reflections                     | 4904 [ $R_{\text{int}} = 0.0457, R_{\text{sigma}} = 0.0477$ ] |
| Data/restraints/parameters                  | 4904/1/266                                                    |
| Goodness-of-fit on $F^2$                    | 1.041                                                         |
| Final R indexes [ $I \geq 2\sigma(I)$ ]     | $R_1 = 0.0399, wR_2 = 0.0983$                                 |
| Final R indexes [all data]                  | $R_1 = 0.0428, wR_2 = 0.1010$                                 |
| Largest diff. peak/hole / e Å <sup>-3</sup> | 0.20/-0.14                                                    |
| Flack parameter                             | 0.06(12)                                                      |

## 7. References:

- [1] (a) Y.-J. Mei, P. A. Bentley and J. Du, *Tetrahedron Lett.*, 2008, **49**, 3802; (b) J.-R. Chen, W.-R. Dong, M. Candy, F.-F. Pan, M. Jörres and C. Bolm, *J. Am. Chem. Soc.*, 2012, **134**, 6924; (c) C. Guo, B. Sahoo, C. G. Daniliuc and F. Glorius, *J. Am. Chem. Soc.*, 2014, **136**, 17402.
- [2] (a) V. B. Birman and X. Li, *Org. Lett.*, 2006, **8**, 1351; (b) V. B. Birman and X. Li, *Org. Lett.*, 2008, **10**, 1115; (c) D. S. B. Daniels, S. R. Smith, T. Lebl, P. Shapland and A. D. Smith, *Synthesis*, 2015, **47**, 34; (d) I. Shiina, K. Nakata, K. Ono, Y.-S. Onda and M. Itagaki, *J. Am. Chem. Soc.*, 2010, **132**, 11629.

## 8. NMR Spectra of Substrates and Products

### $^1\text{H}$ NMR spectrum of **1a**

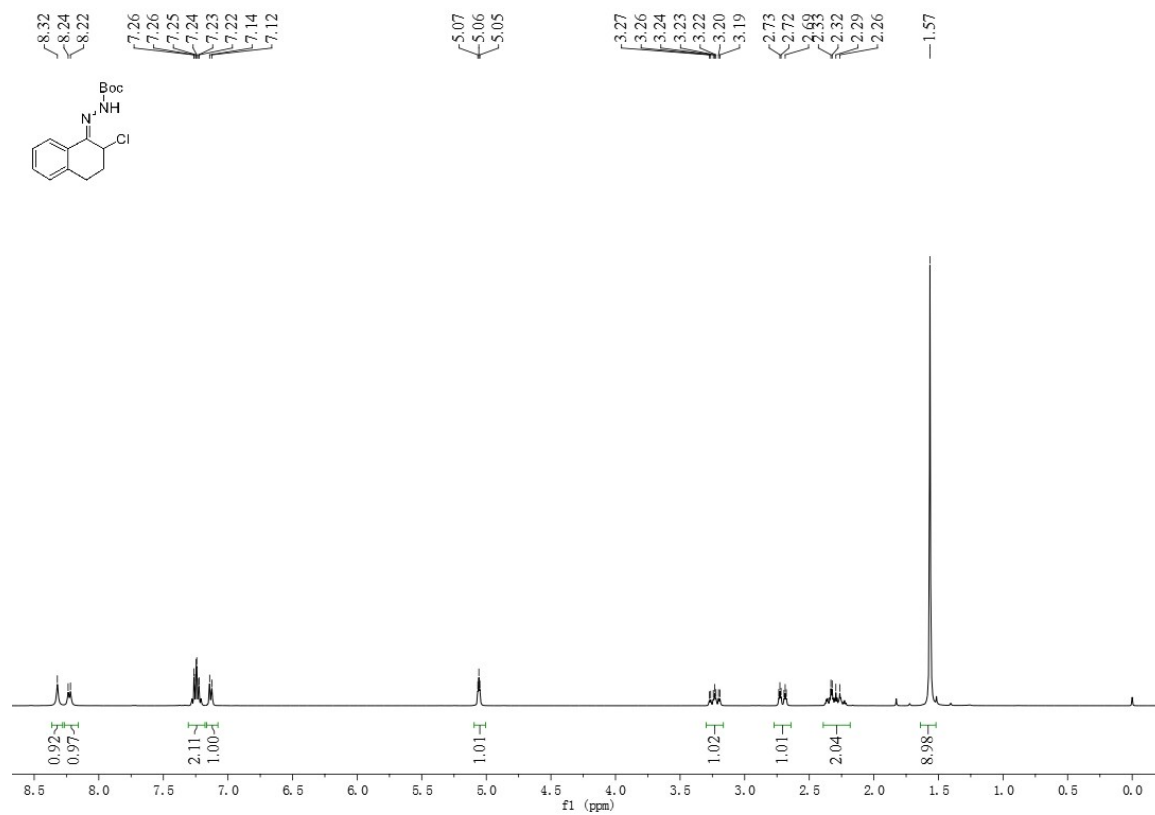

### $^{13}\text{C}$ NMR spectrum of **1a**

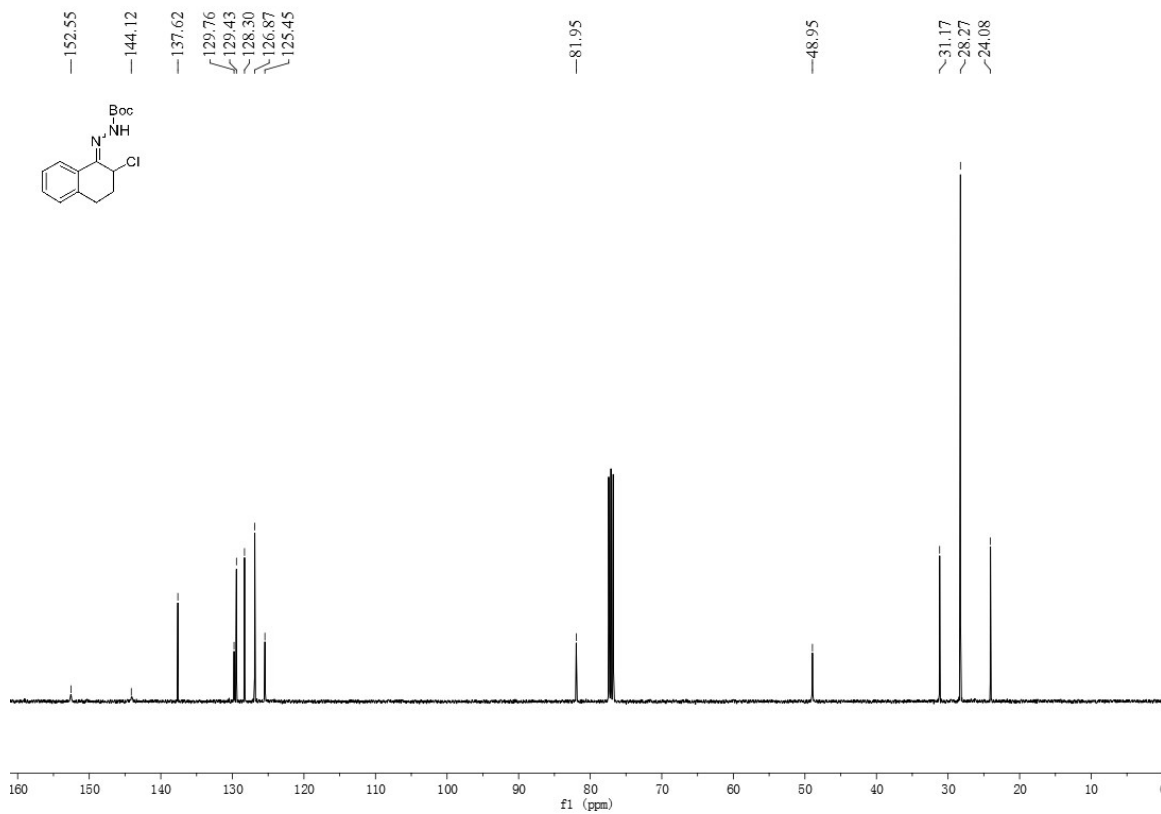

### $^1\text{H}$ NMR spectrum of **1d**

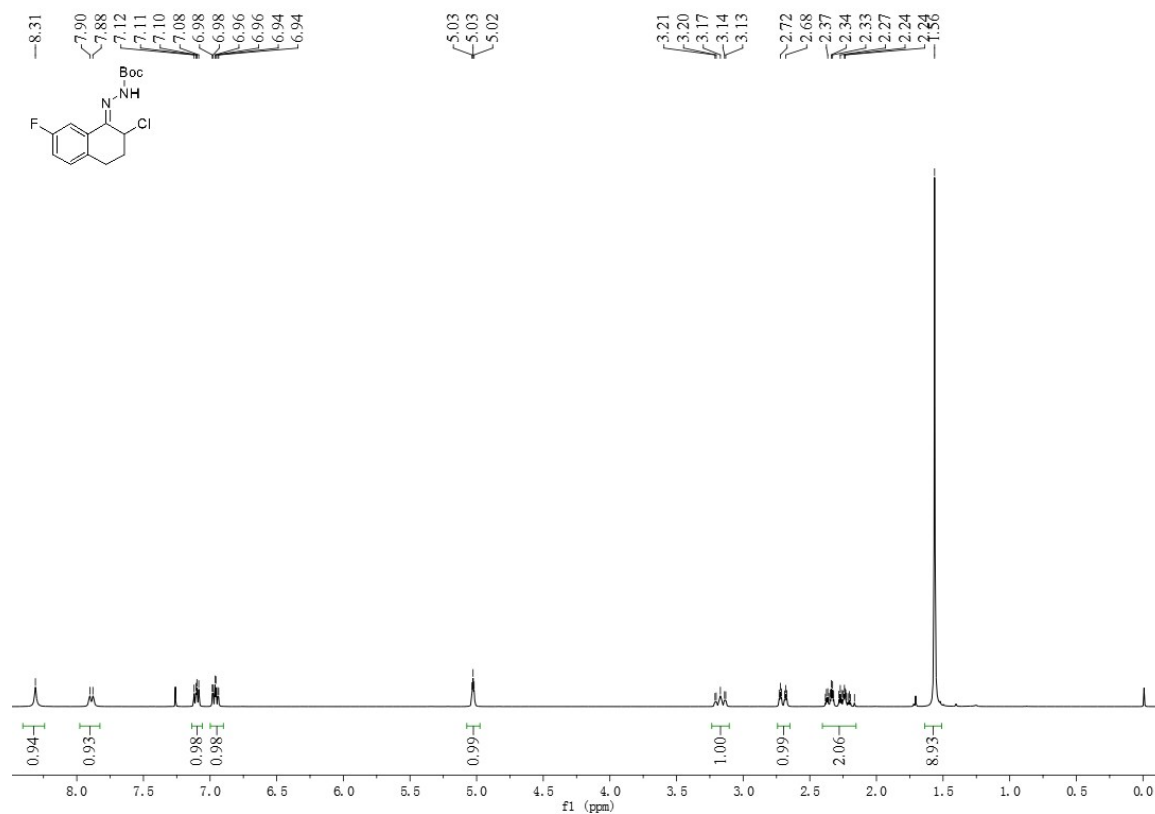

### $^{13}\text{C}$ NMR spectrum of **1d**

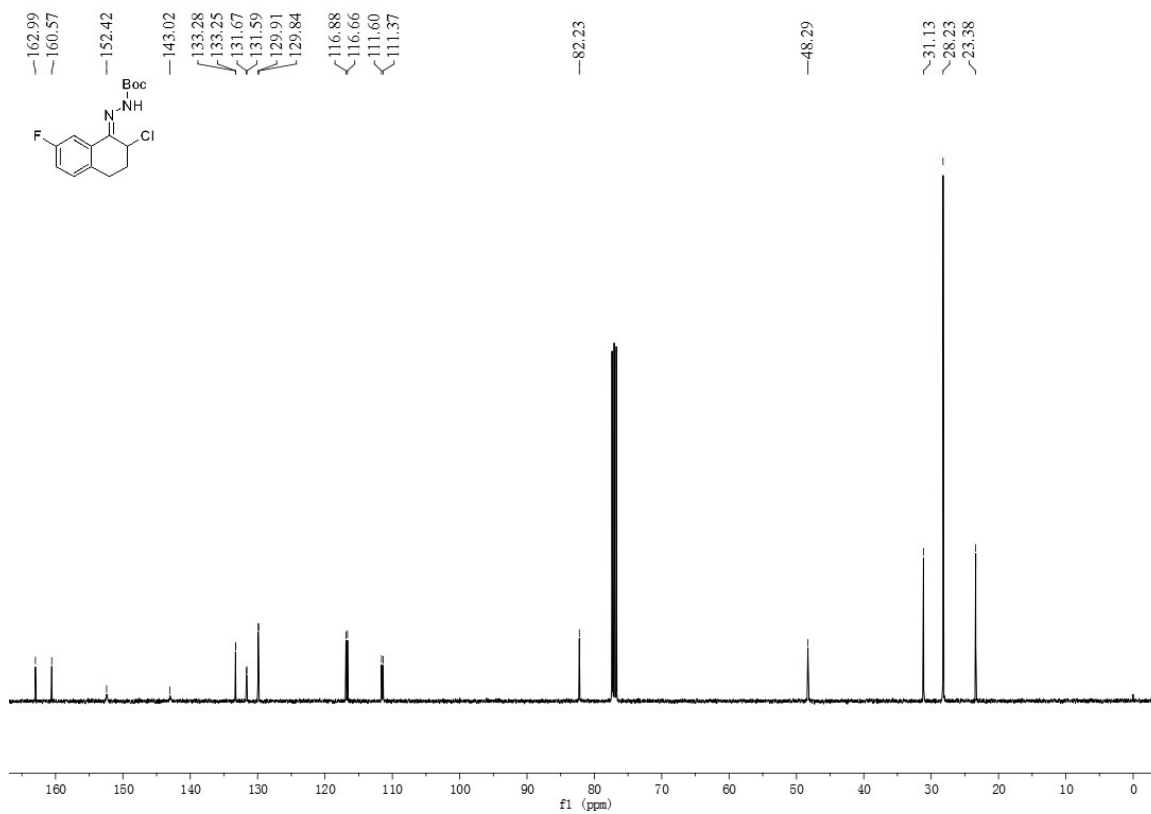



<sup>1</sup>H NMR spectrum of **1e**

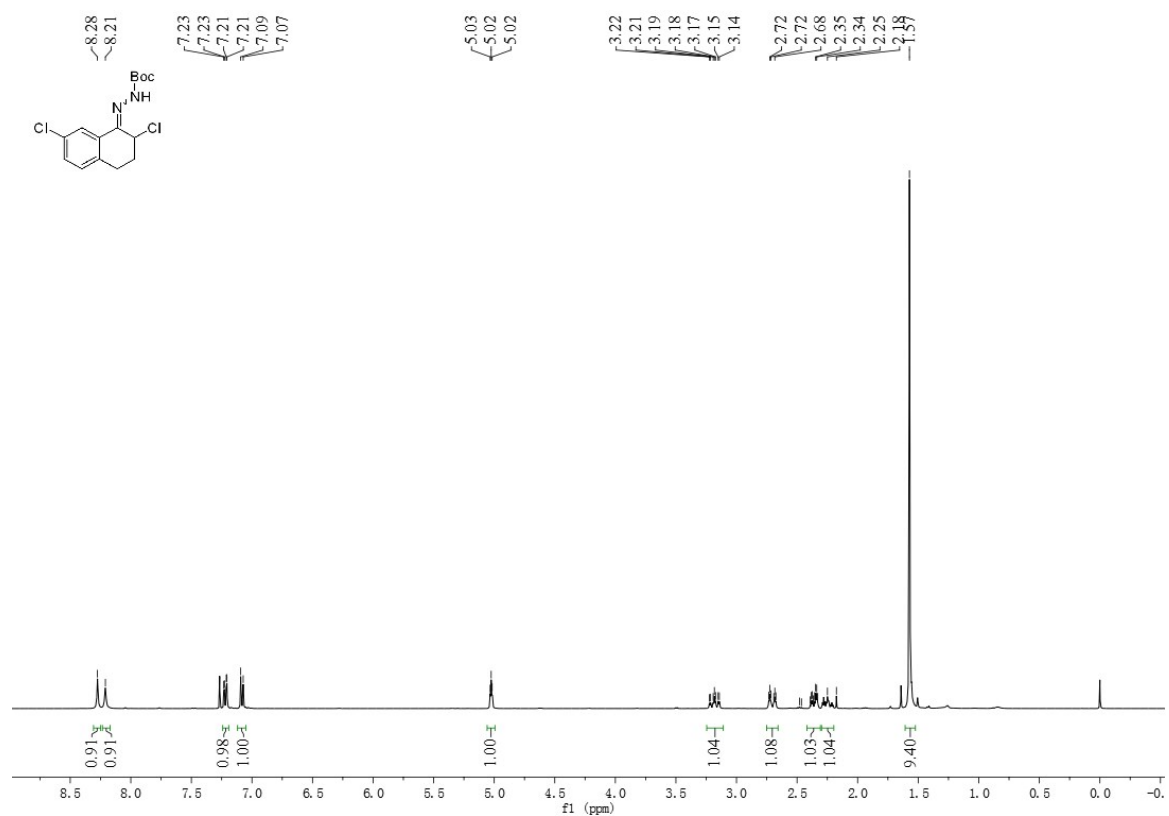

<sup>13</sup>C NMR spectrum of **1e**

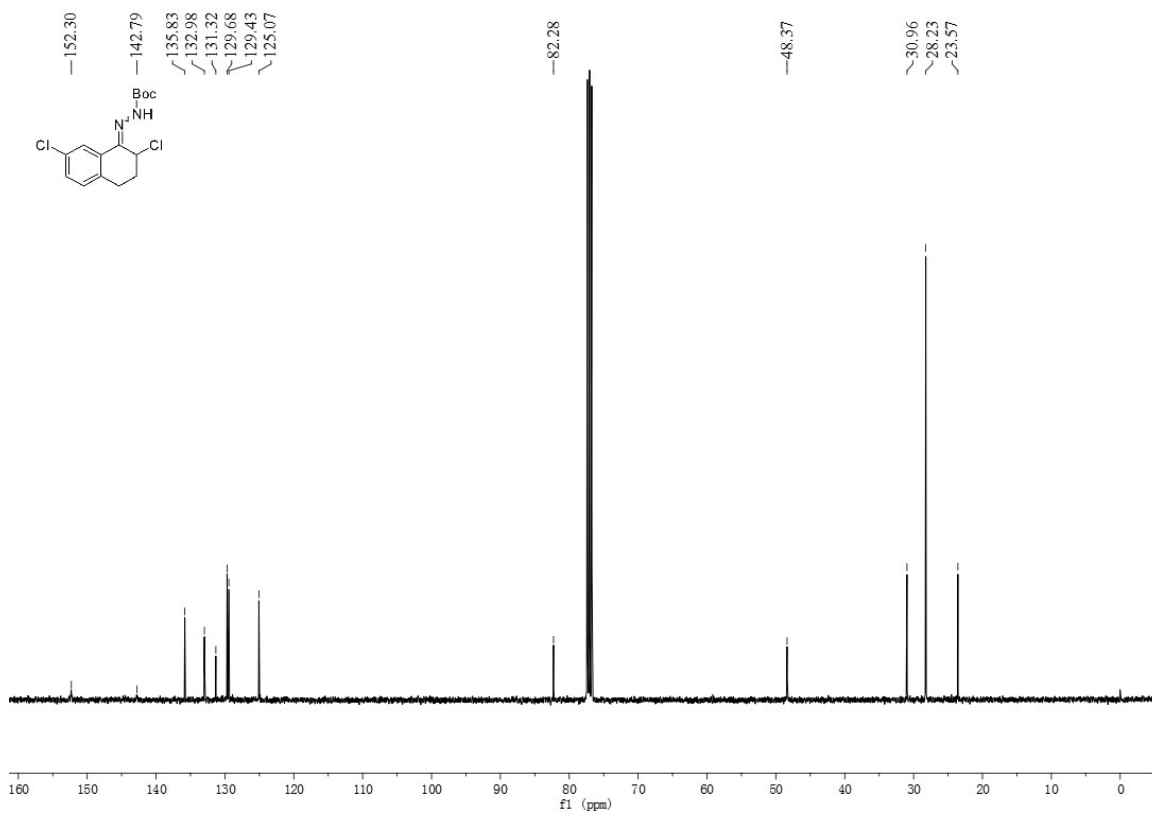

# <sup>1</sup>H NMR spectrum of **1f**

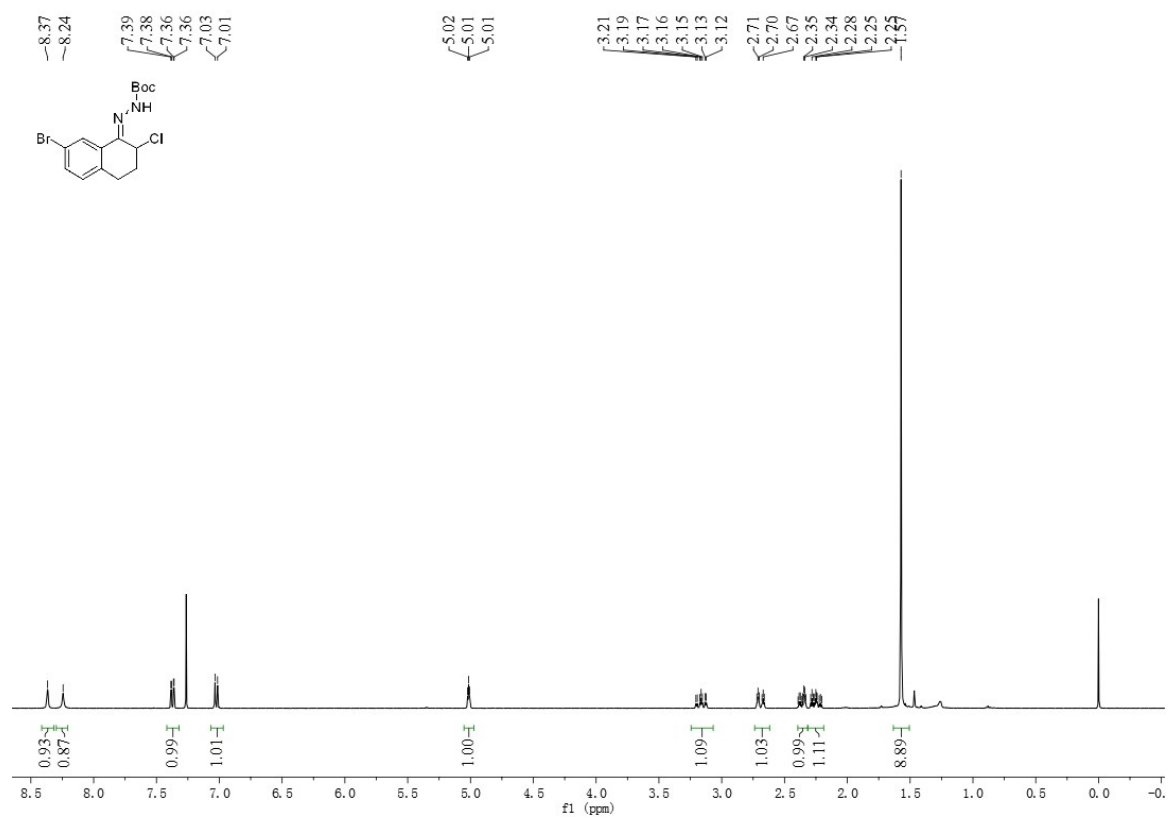

# <sup>13</sup>C NMR spectrum of **1f**

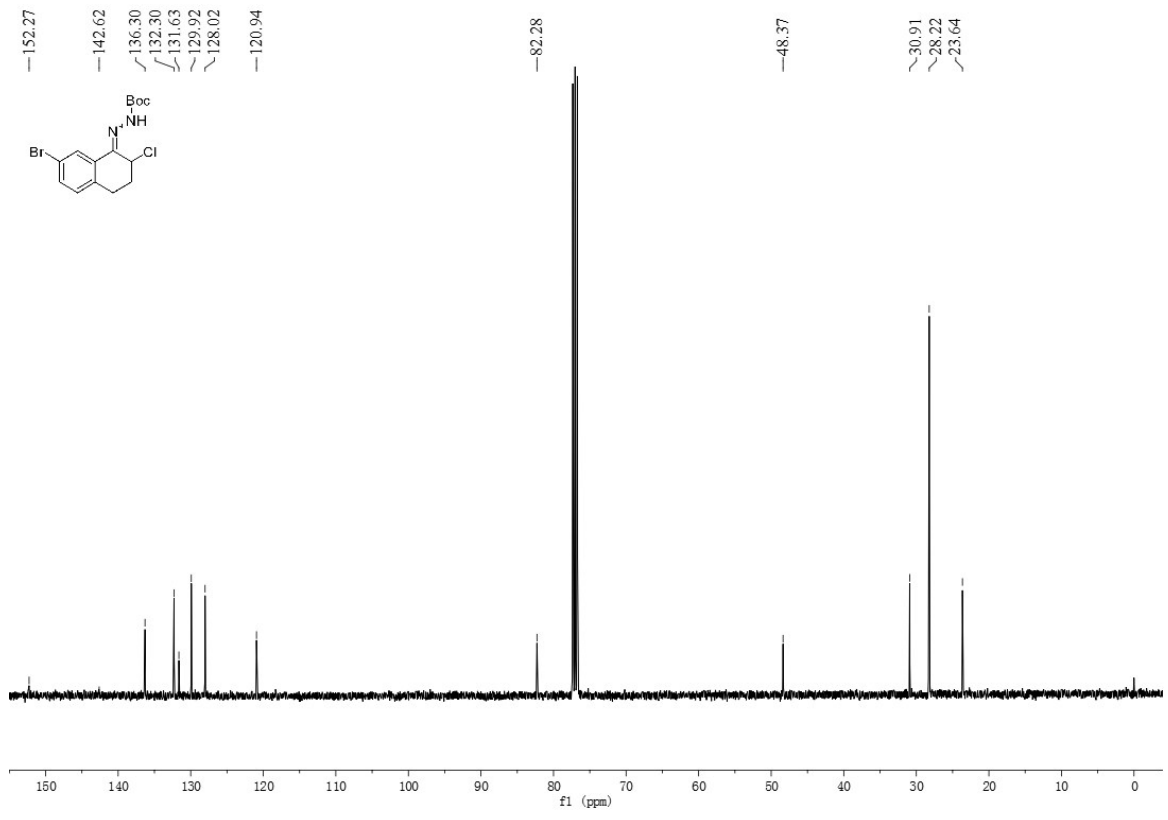

# $^1\text{H}$ NMR spectrum of **1g**

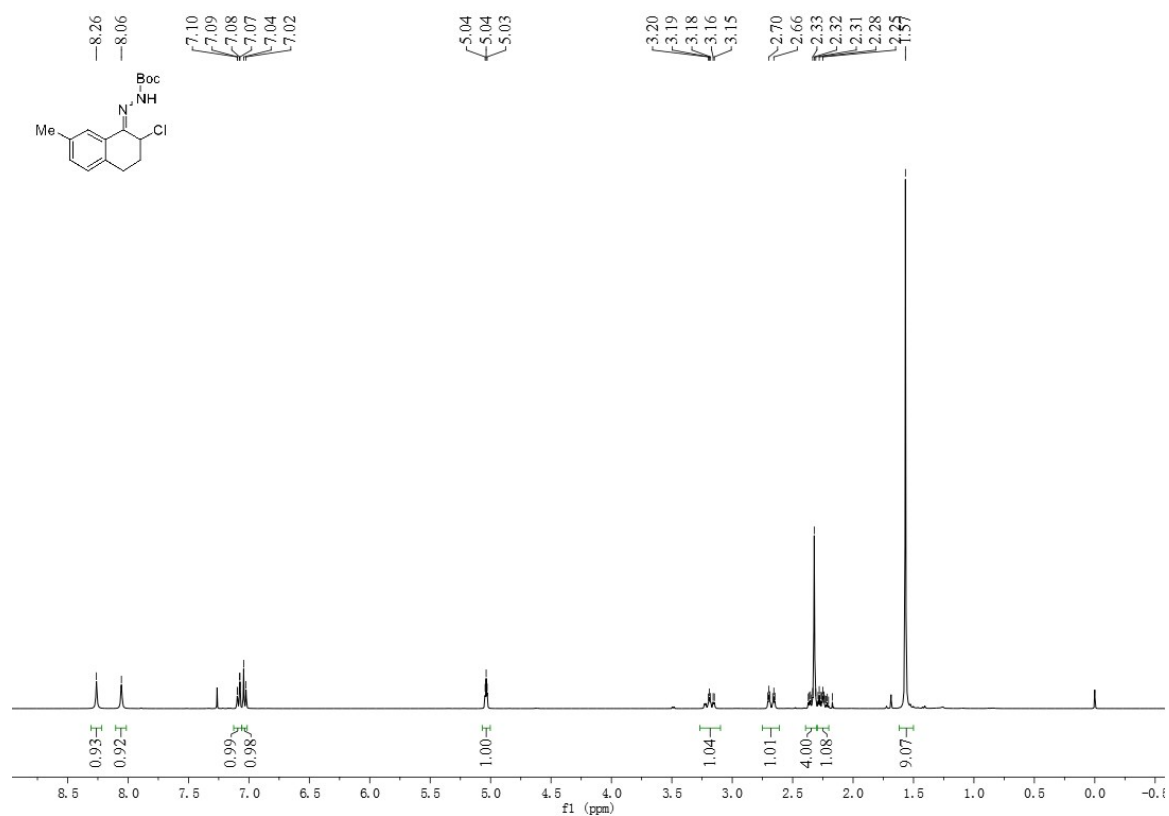

# $^{13}\text{C}$ NMR spectrum of **1g**

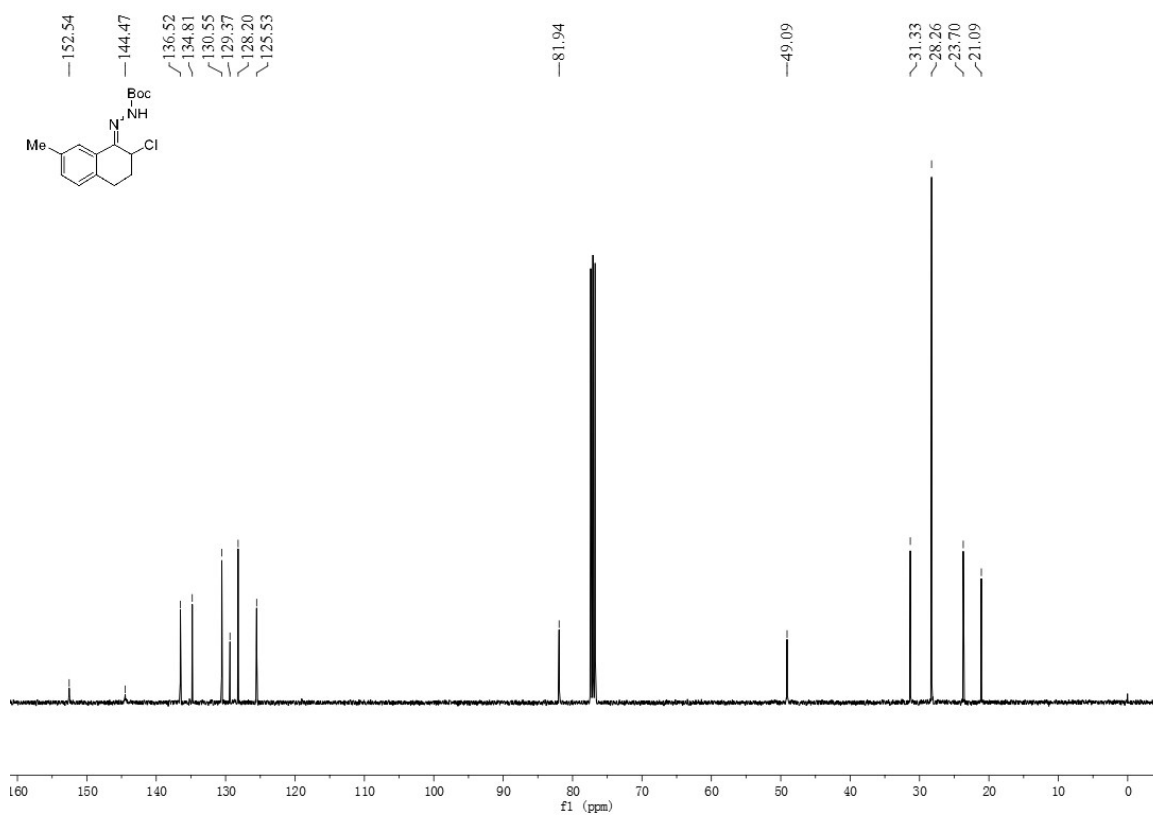

# <sup>1</sup>H NMR spectrum of **1h**

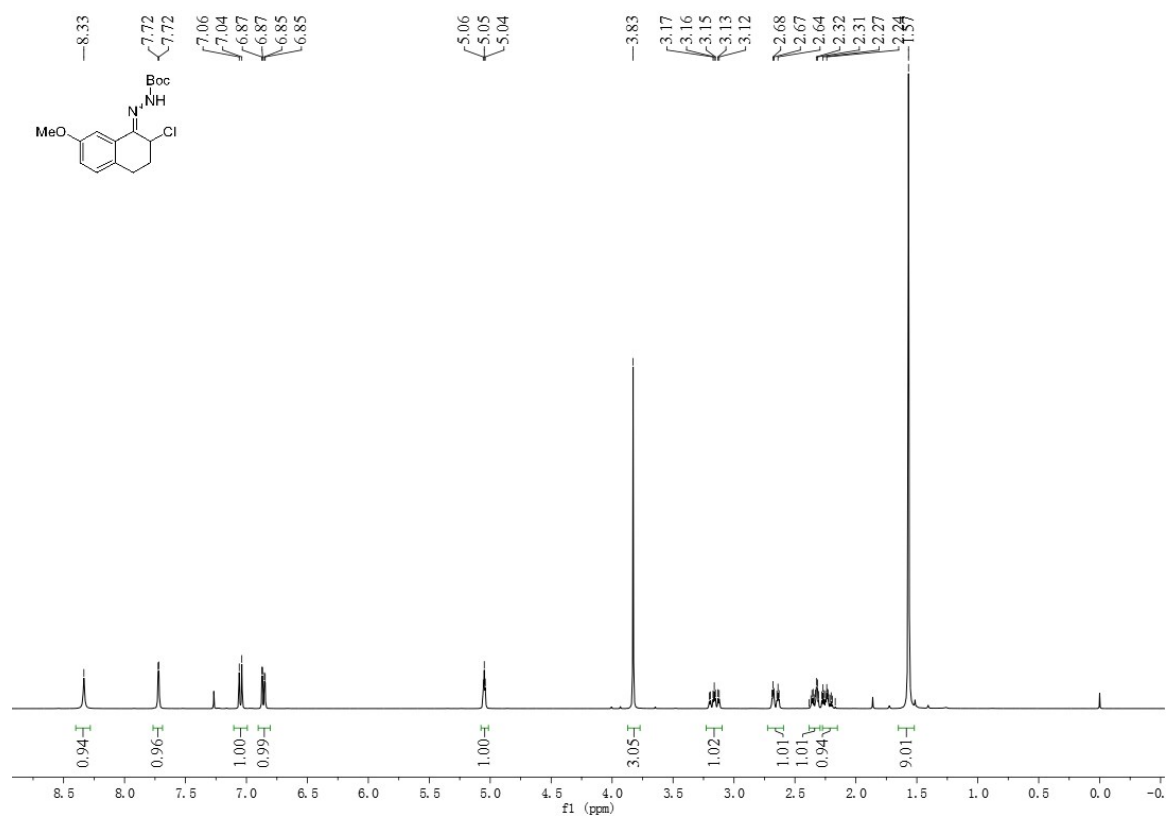

# <sup>13</sup>C NMR spectrum of **1h**

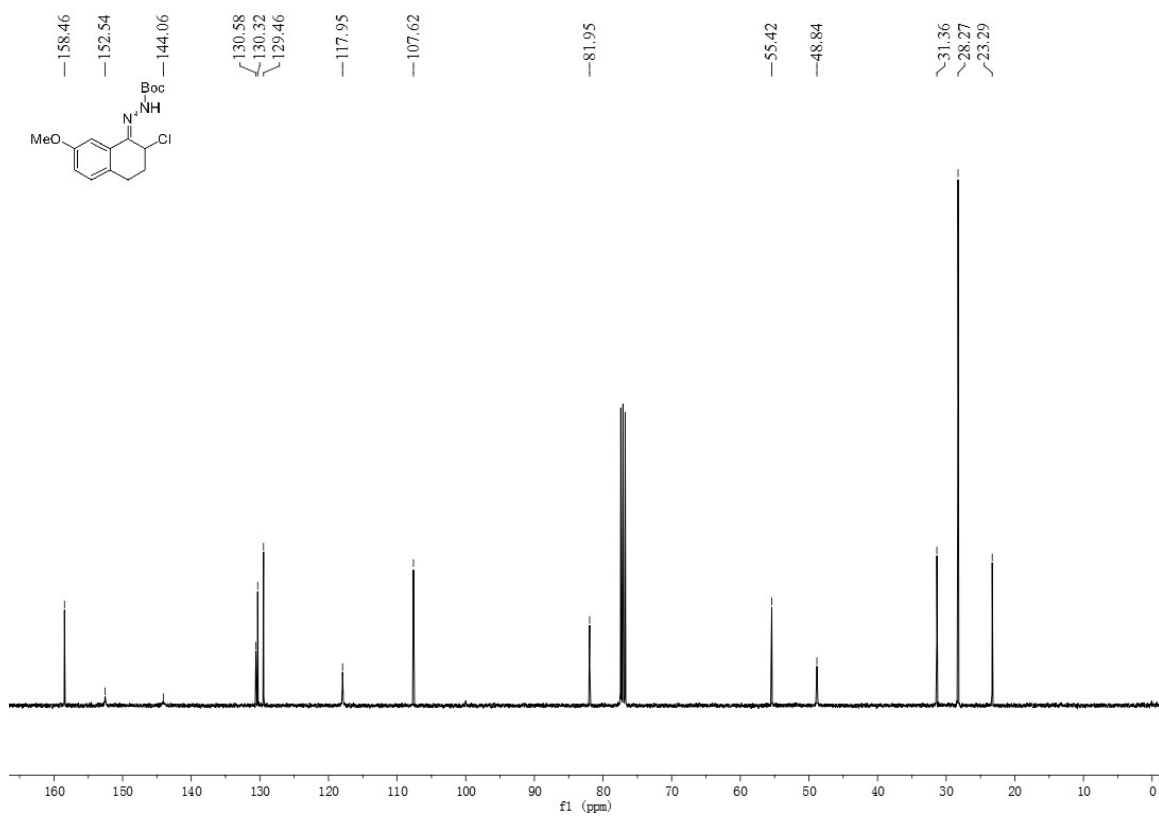

# <sup>1</sup>H NMR spectrum of **1i**

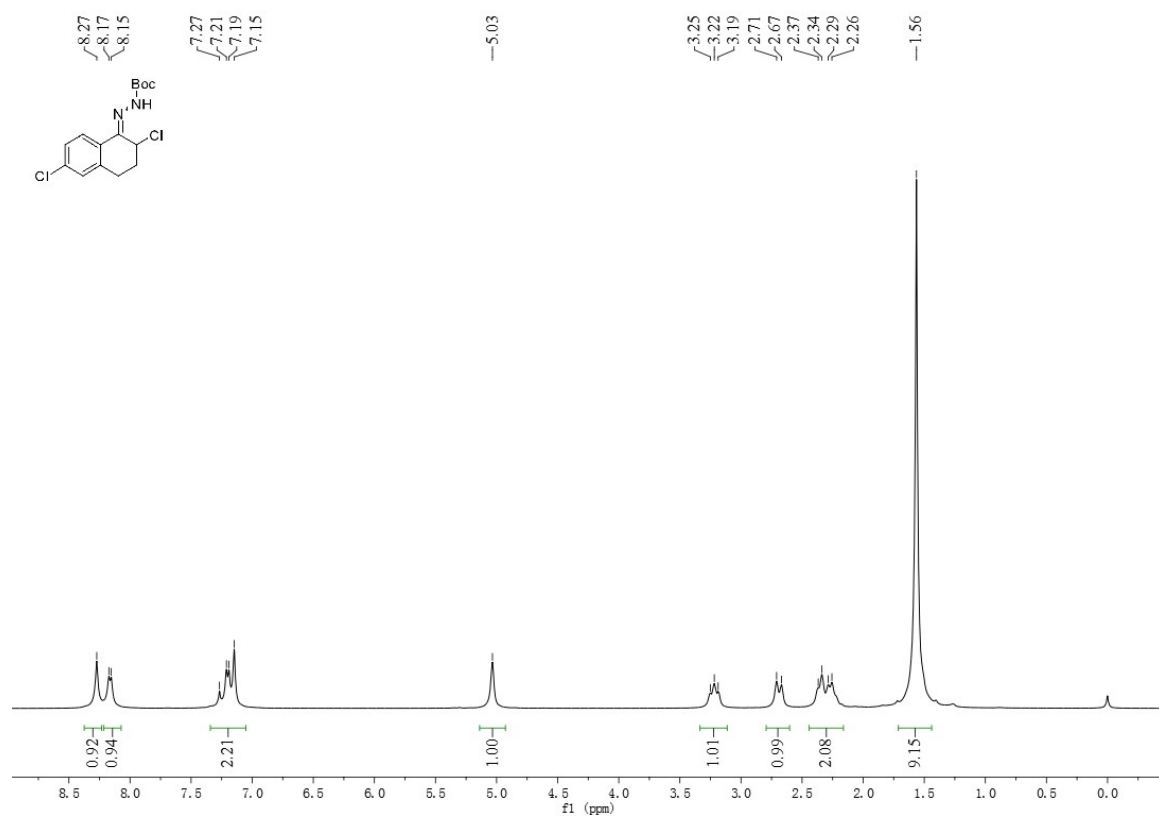

# <sup>13</sup>C NMR spectrum of **1i**

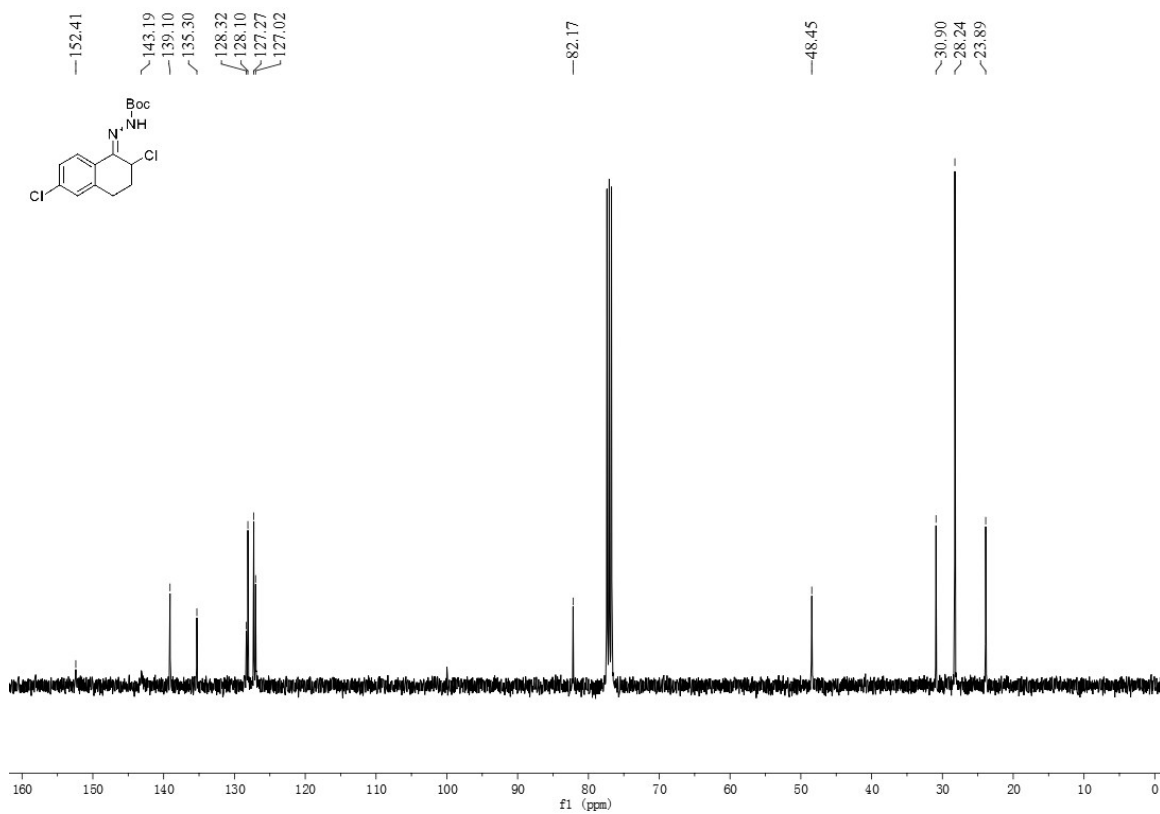

# <sup>1</sup>H NMR spectrum of **1j**

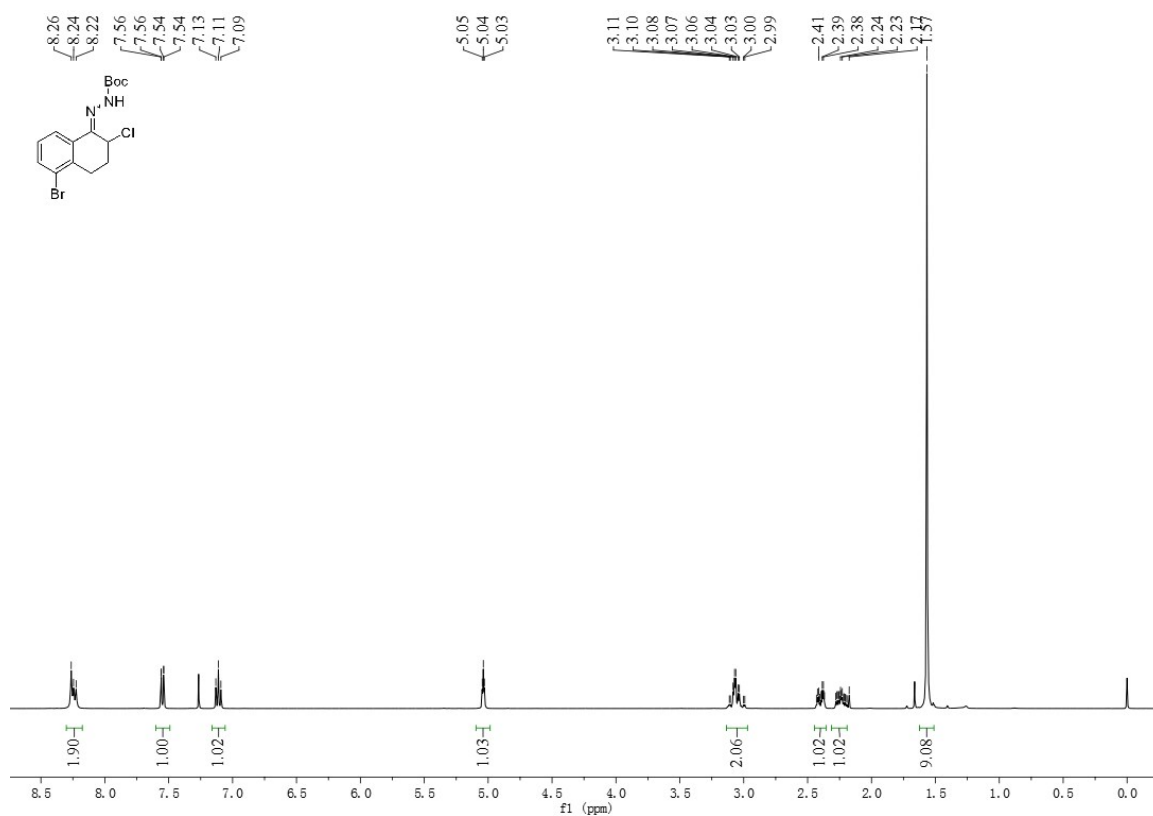

# <sup>13</sup>C NMR spectrum of **1j**

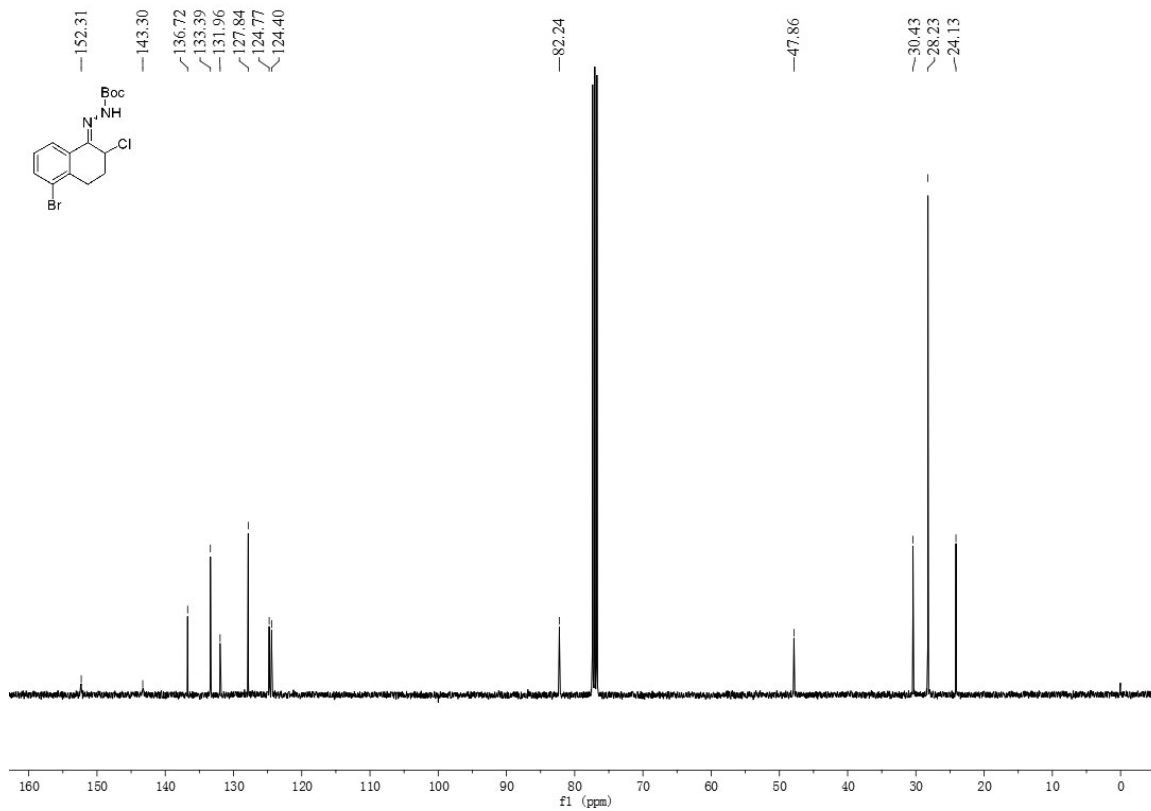

<sup>1</sup>H NMR spectrum of **1k**

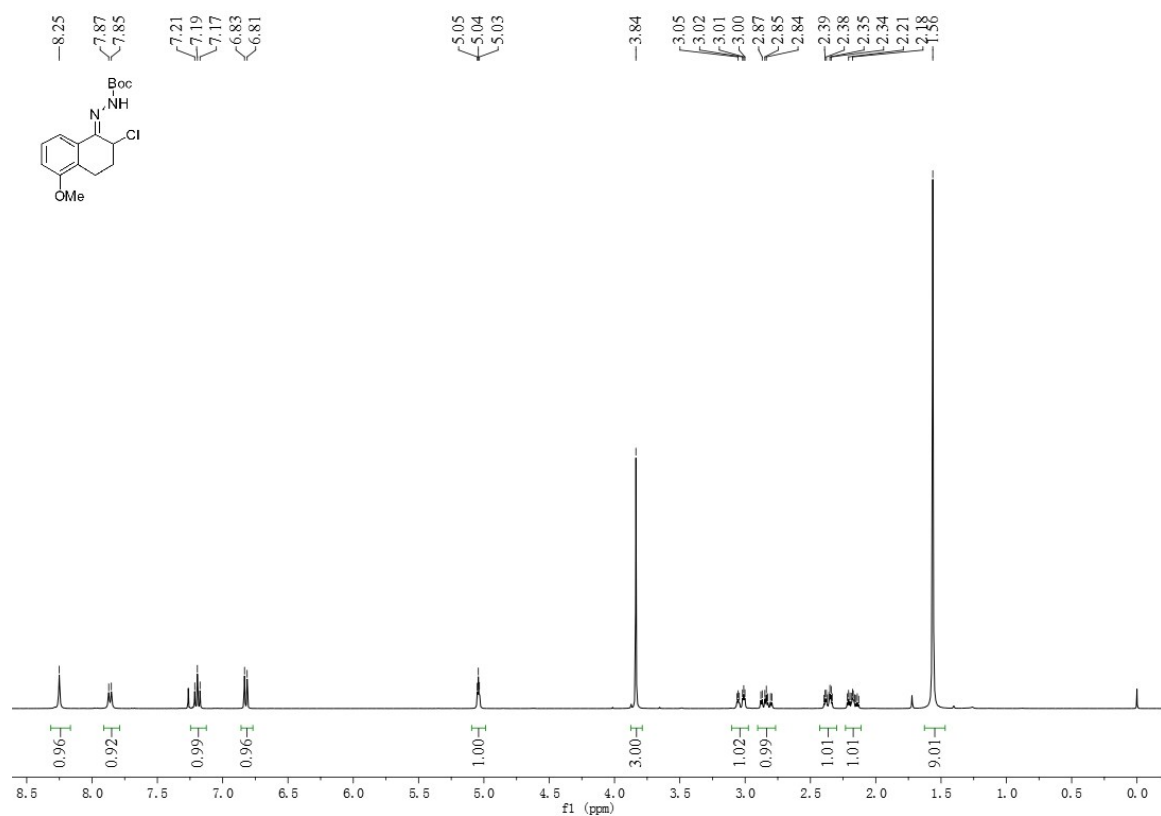

<sup>13</sup>C NMR spectrum of **1k**

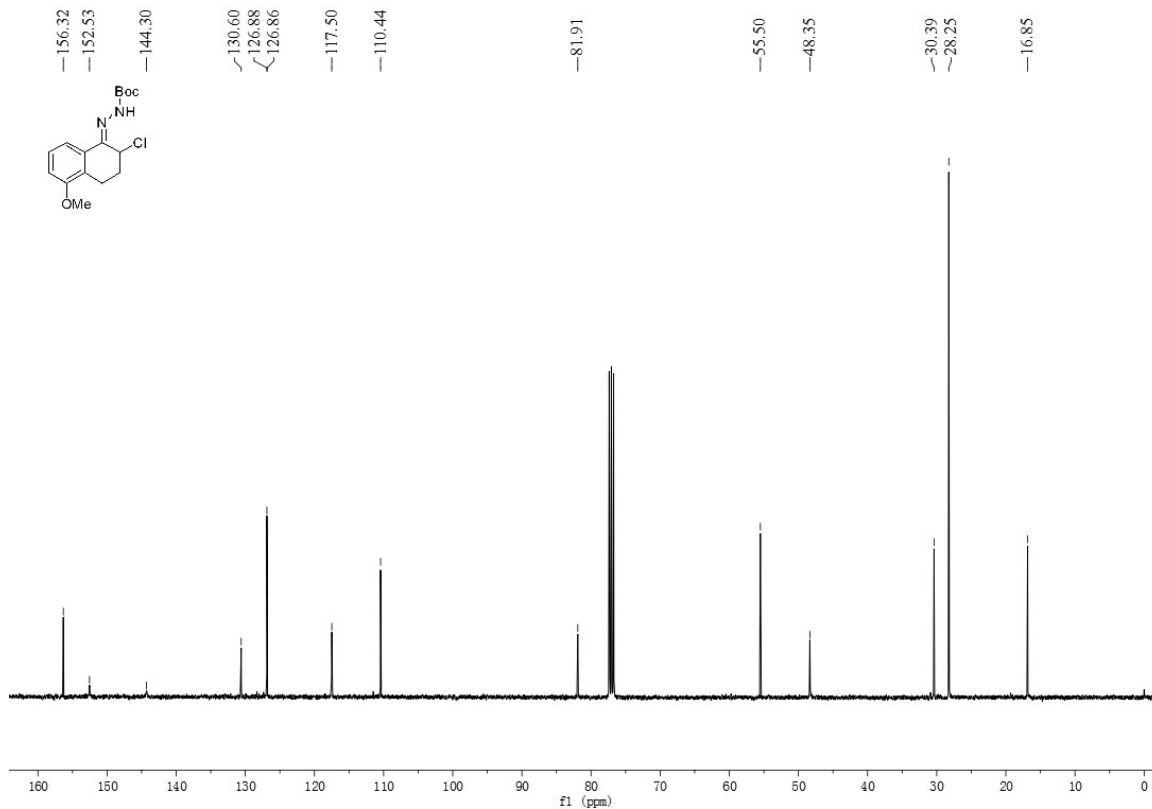

### <sup>1</sup>H NMR spectrum of **3aa**

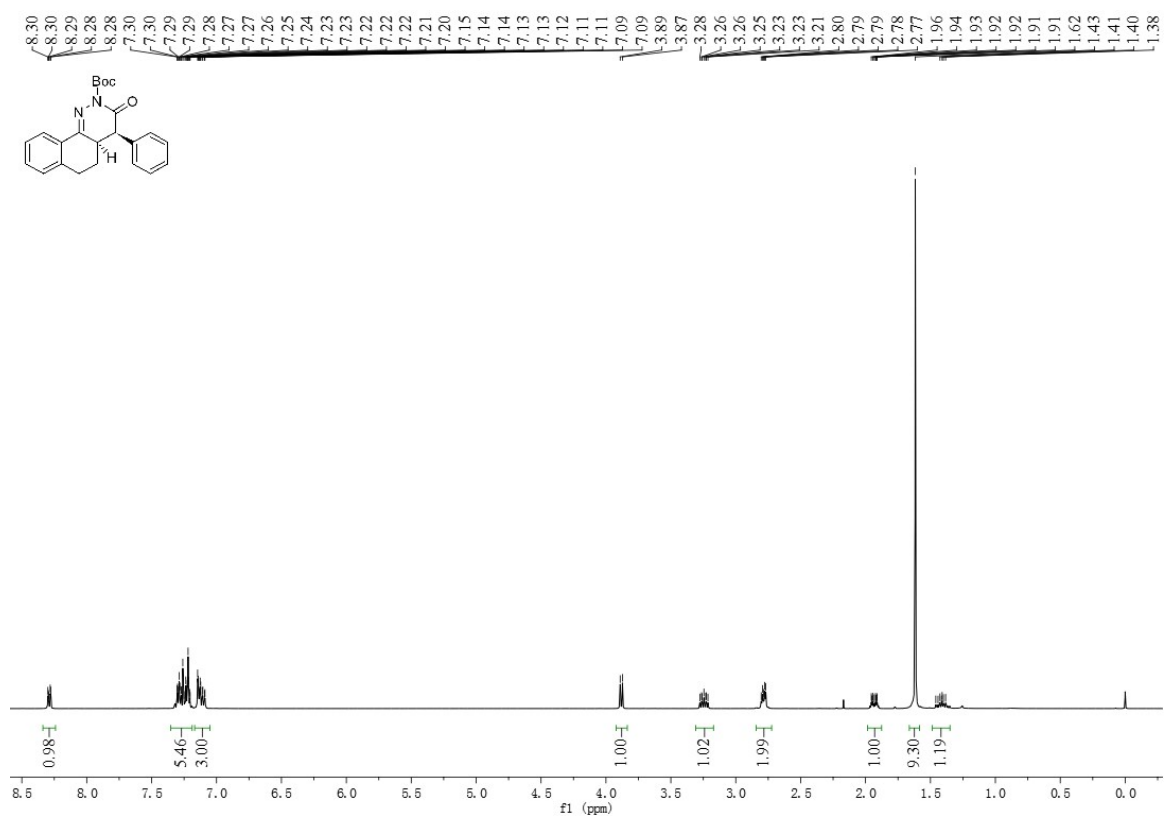

### <sup>13</sup>C NMR spectrum of **3aa**

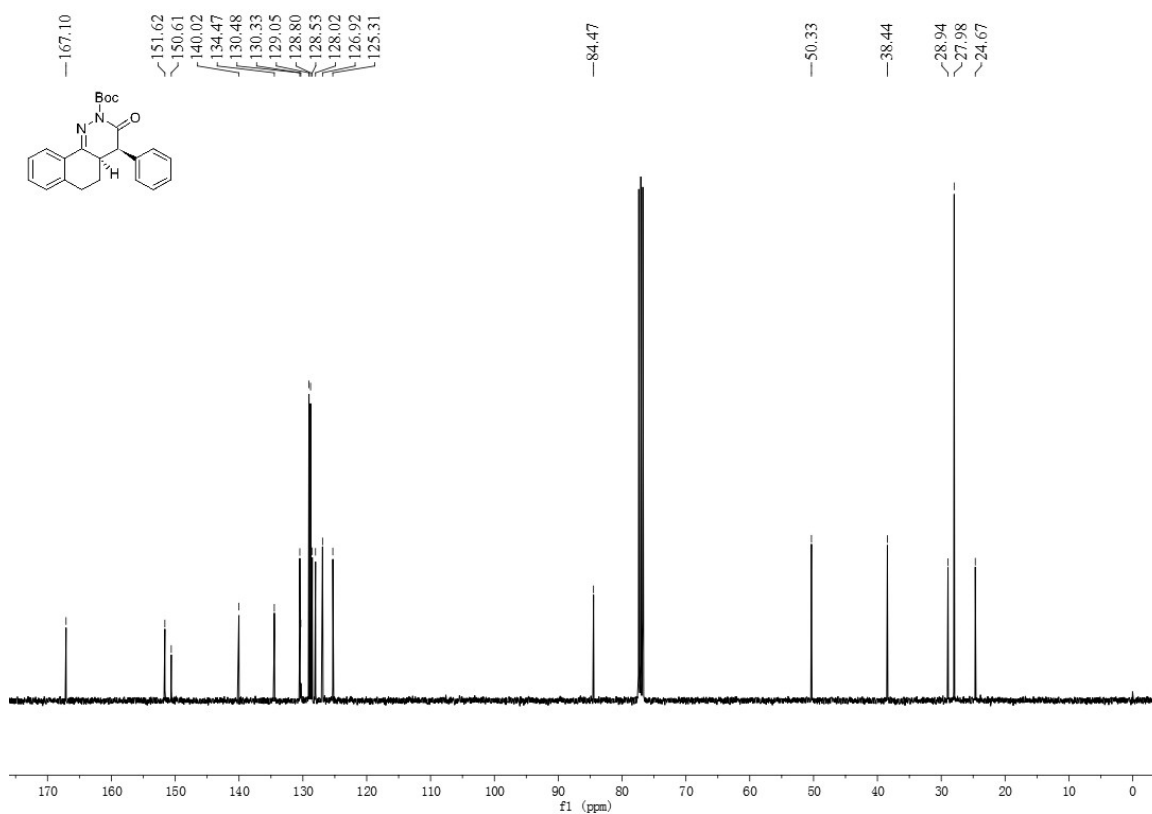



### <sup>1</sup>H NMR spectrum of **3ab**

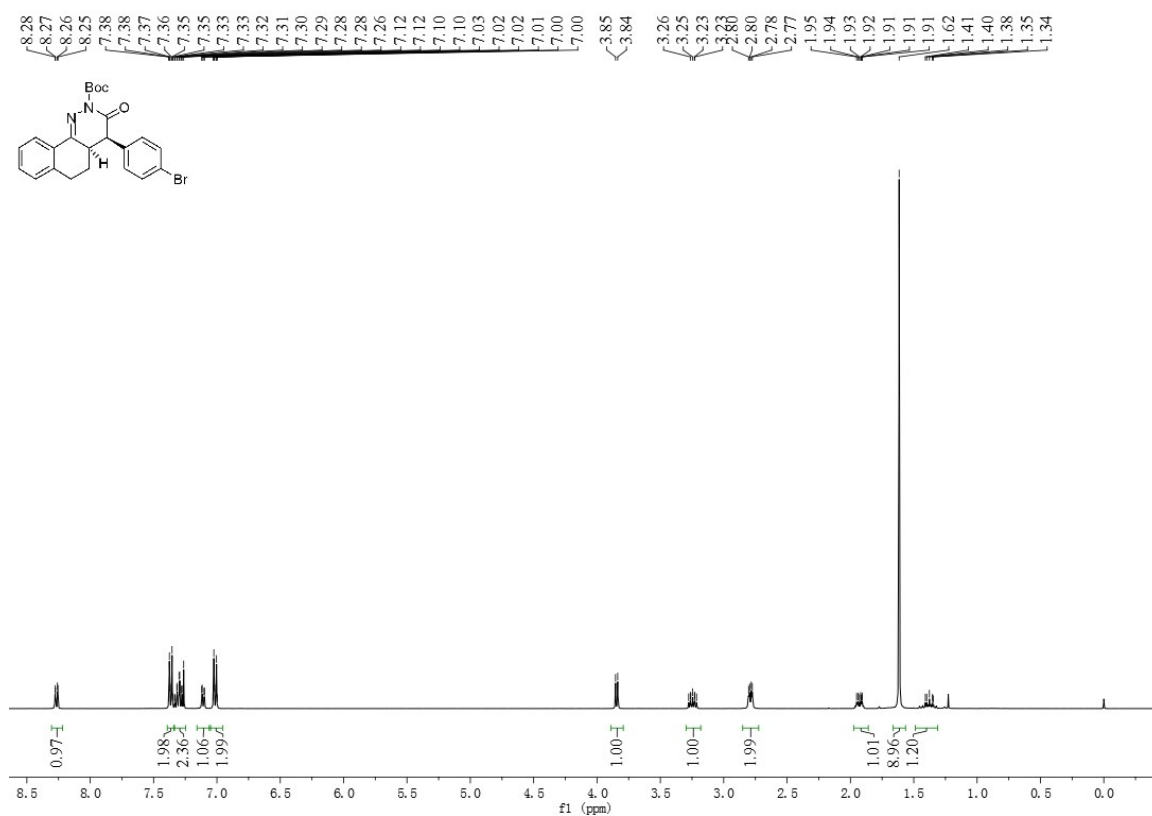

### <sup>13</sup>C NMR spectrum of **3ab**

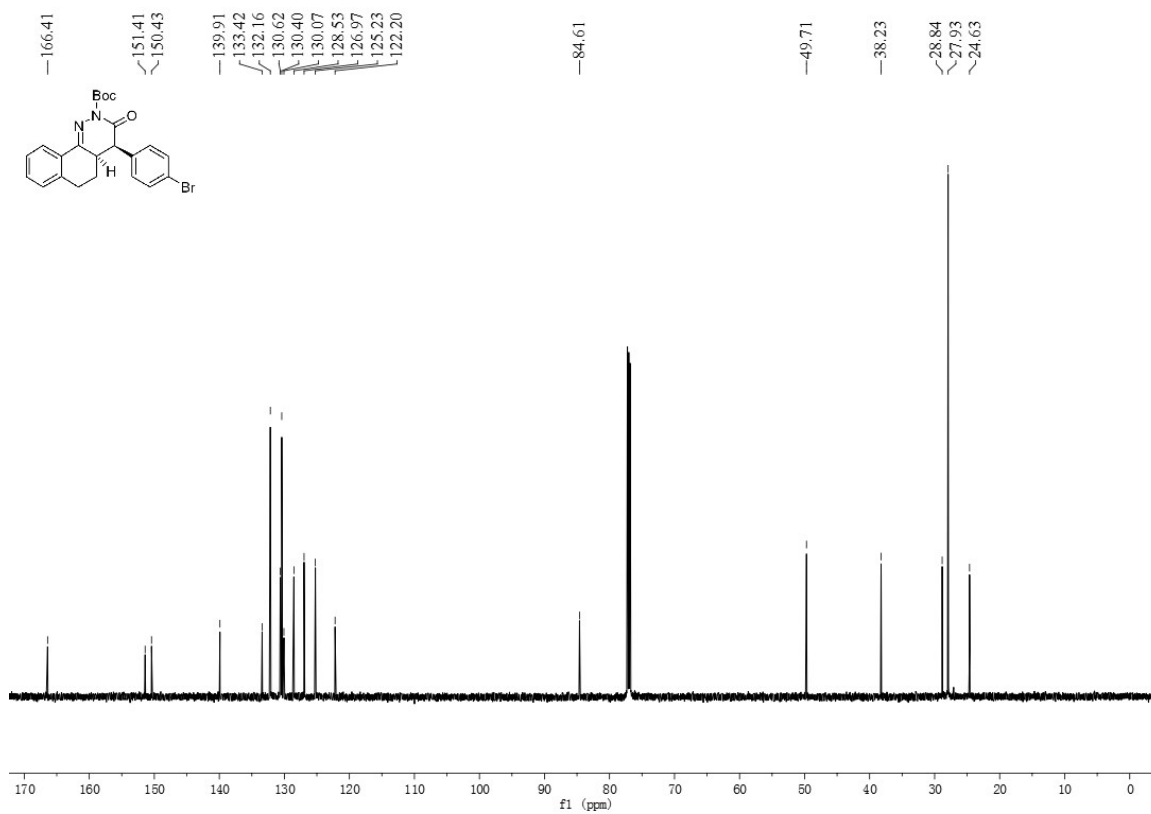

### $^1\text{H}$ NMR spectrum of **3ac**

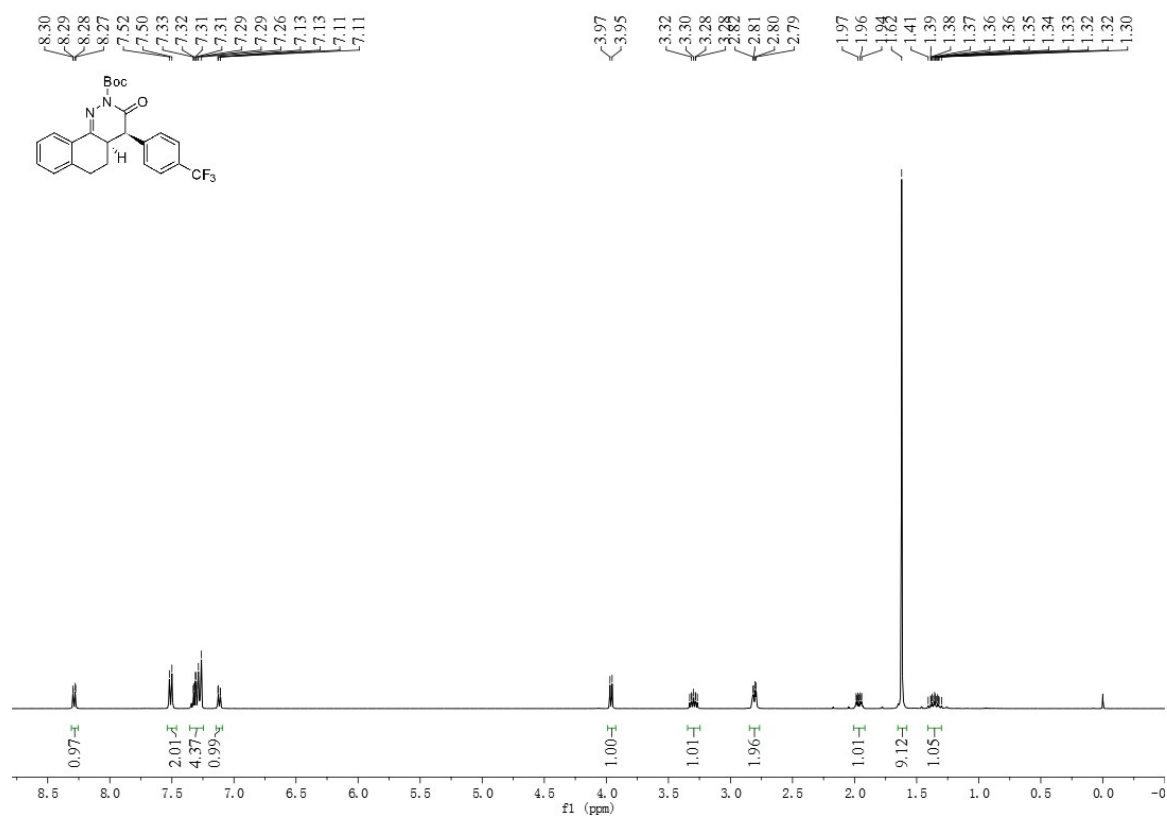

### $^{13}\text{C}$ NMR spectrum of **3ac**

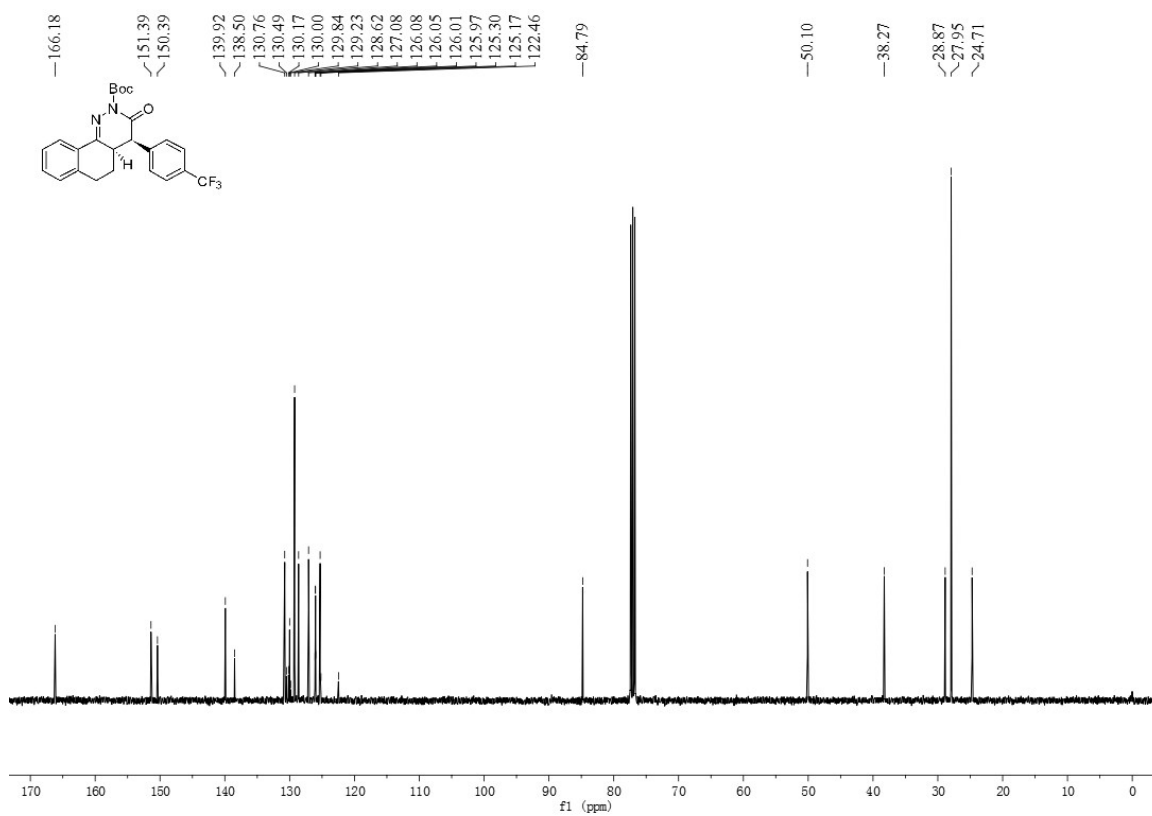

### $^1\text{H}$ NMR spectrum of **3ad**

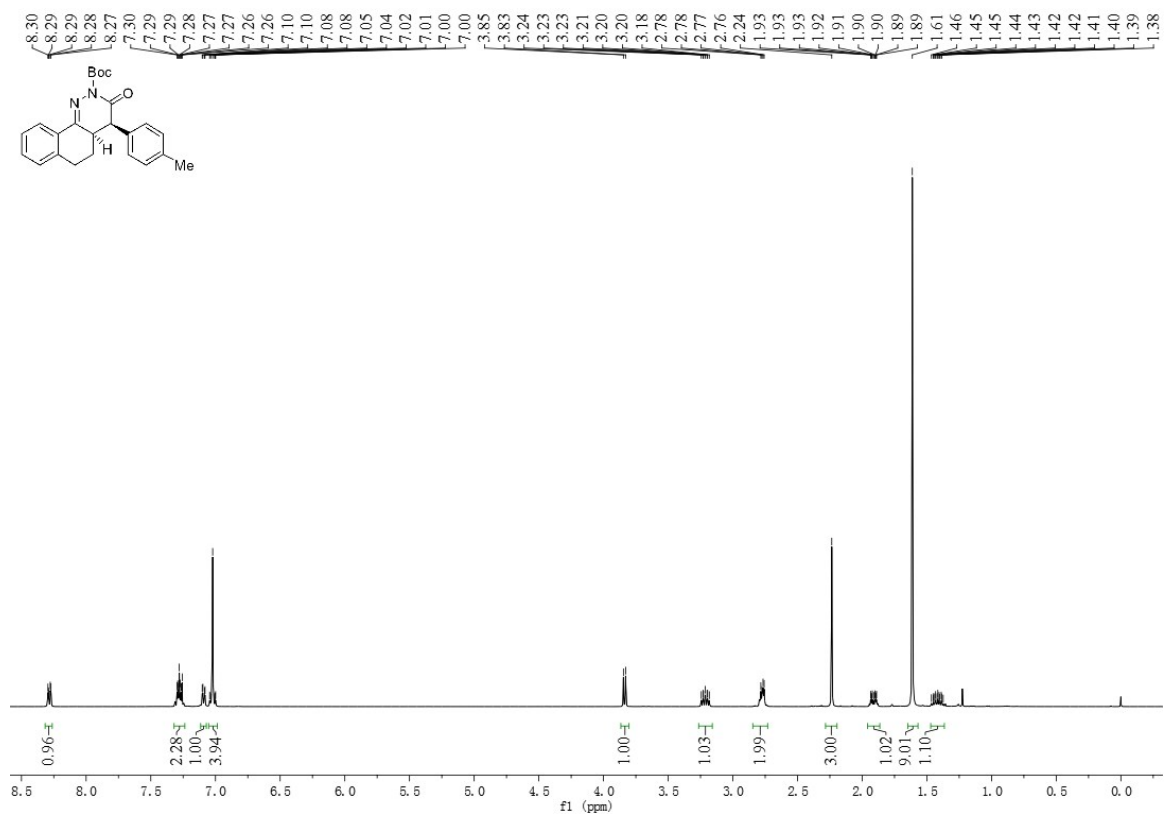

### $^{13}\text{C}$ NMR spectrum of **3ad**

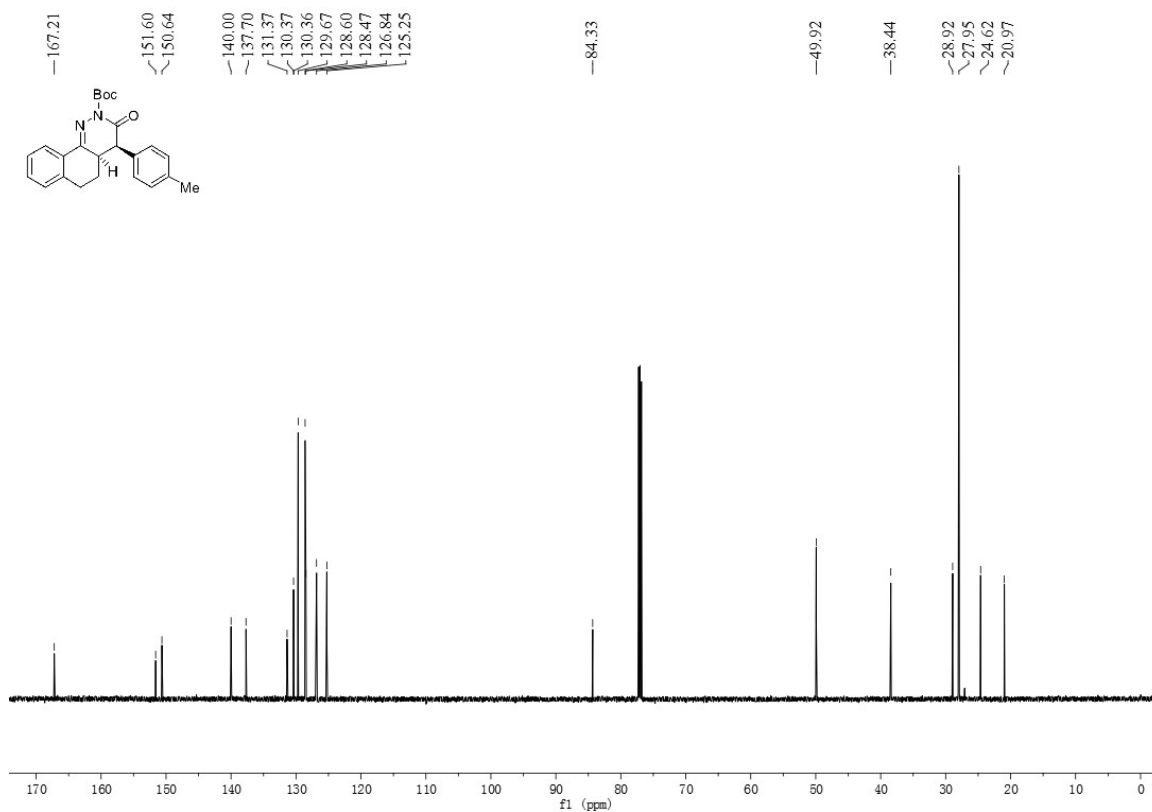

### <sup>1</sup>H NMR spectrum of 3ae

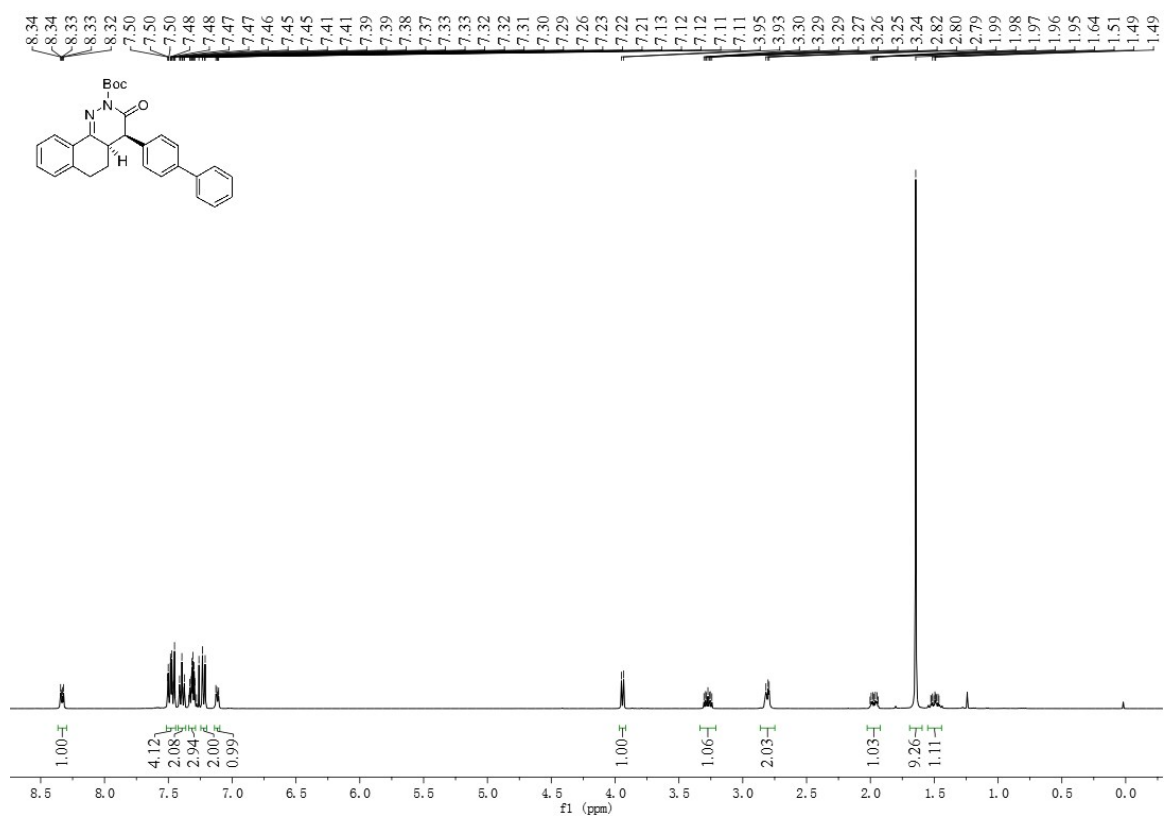

### <sup>13</sup>C NMR spectrum of 3ae

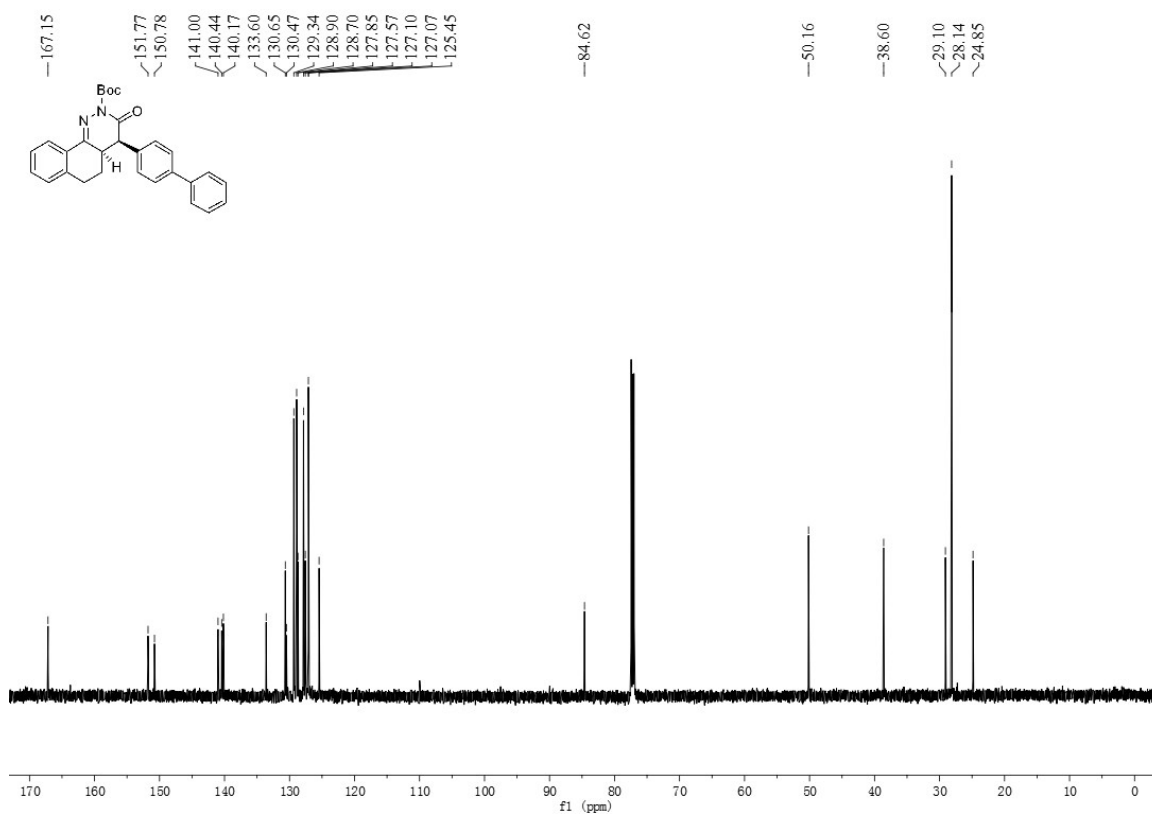

### <sup>1</sup>H NMR spectrum of **3af**

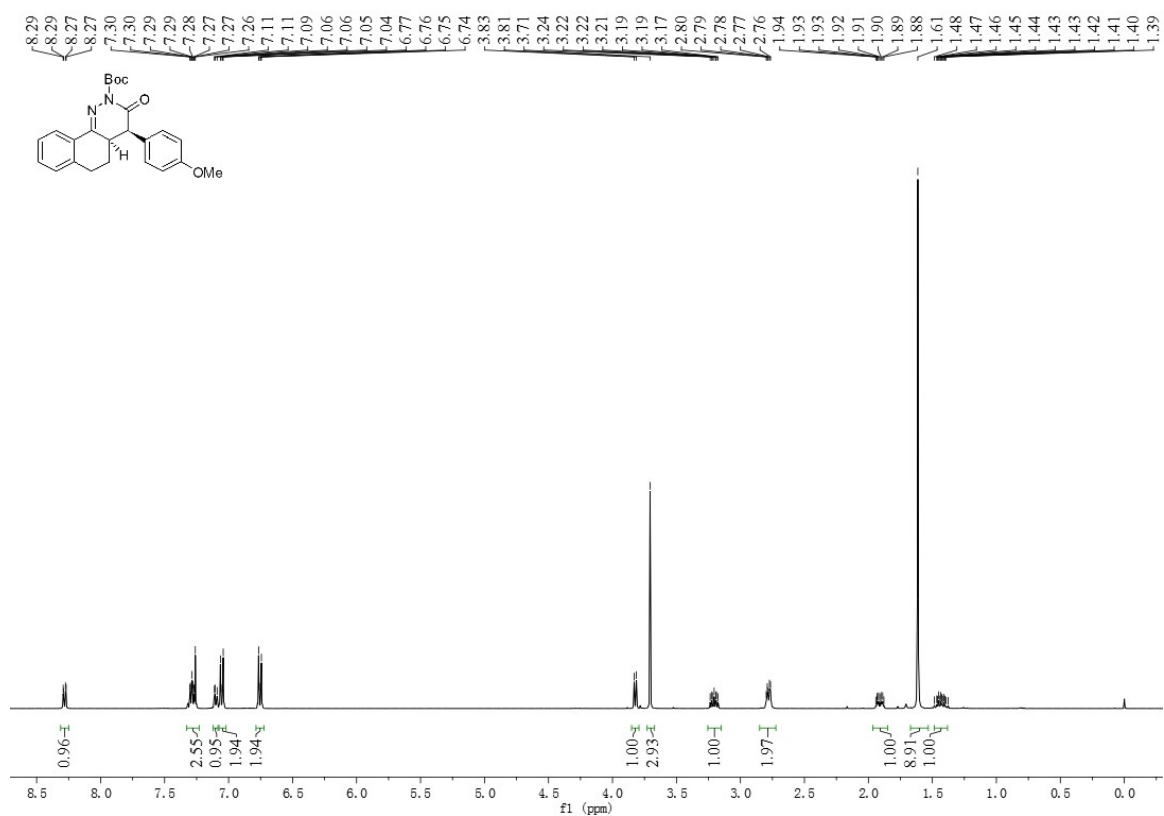

### <sup>13</sup>C NMR spectrum of **3af**

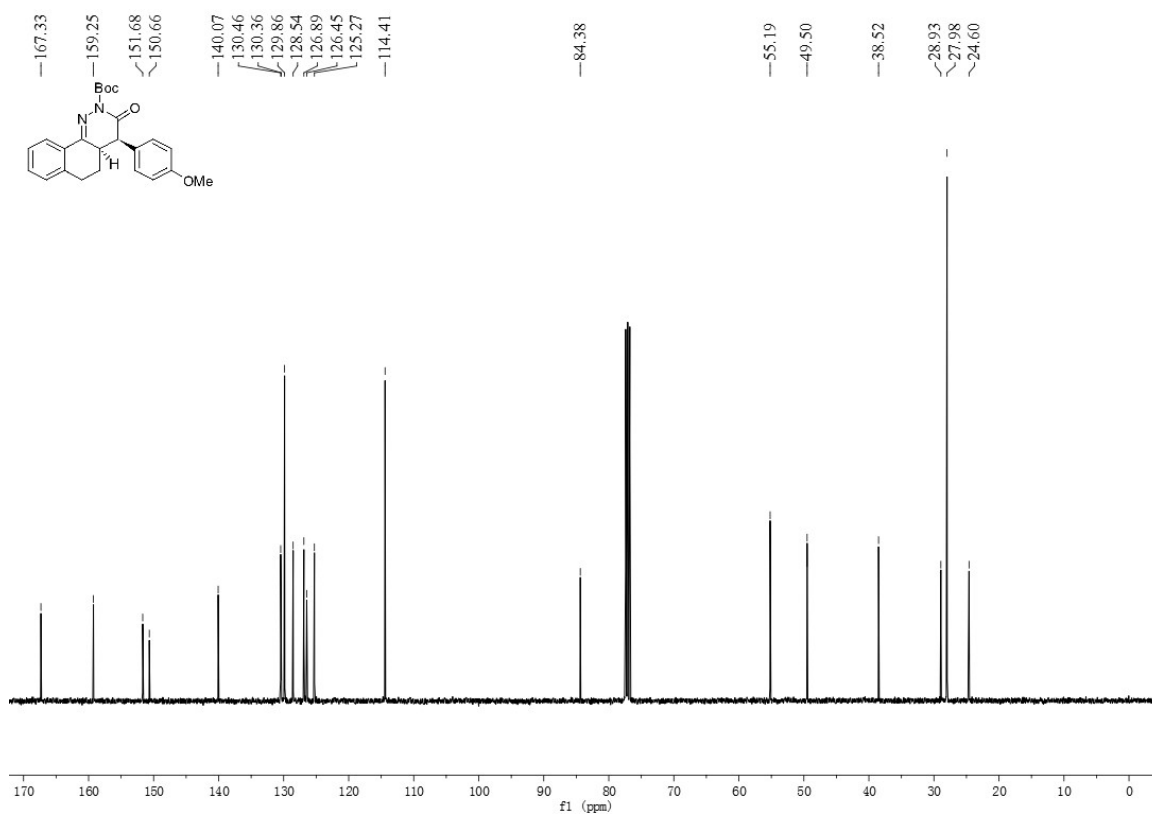

<sup>1</sup>H NMR spectrum of **3ag**

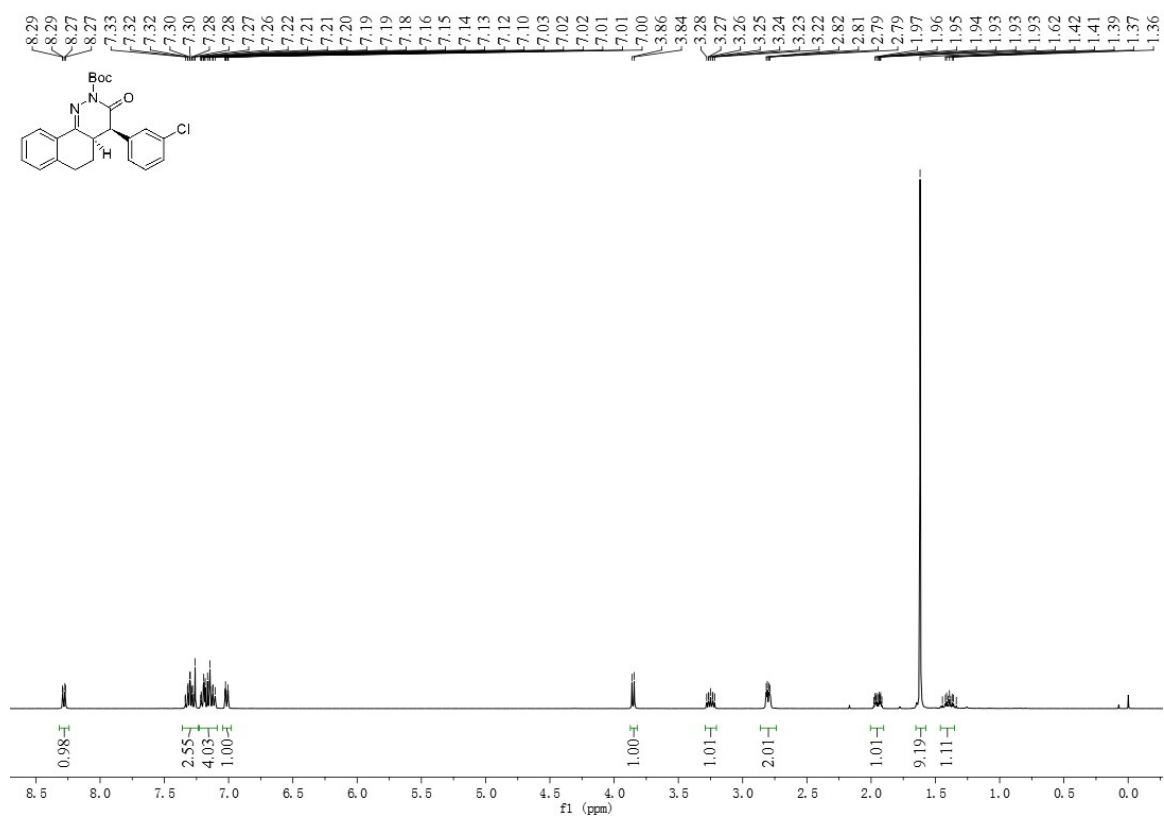

<sup>13</sup>C NMR spectrum of **3ag**

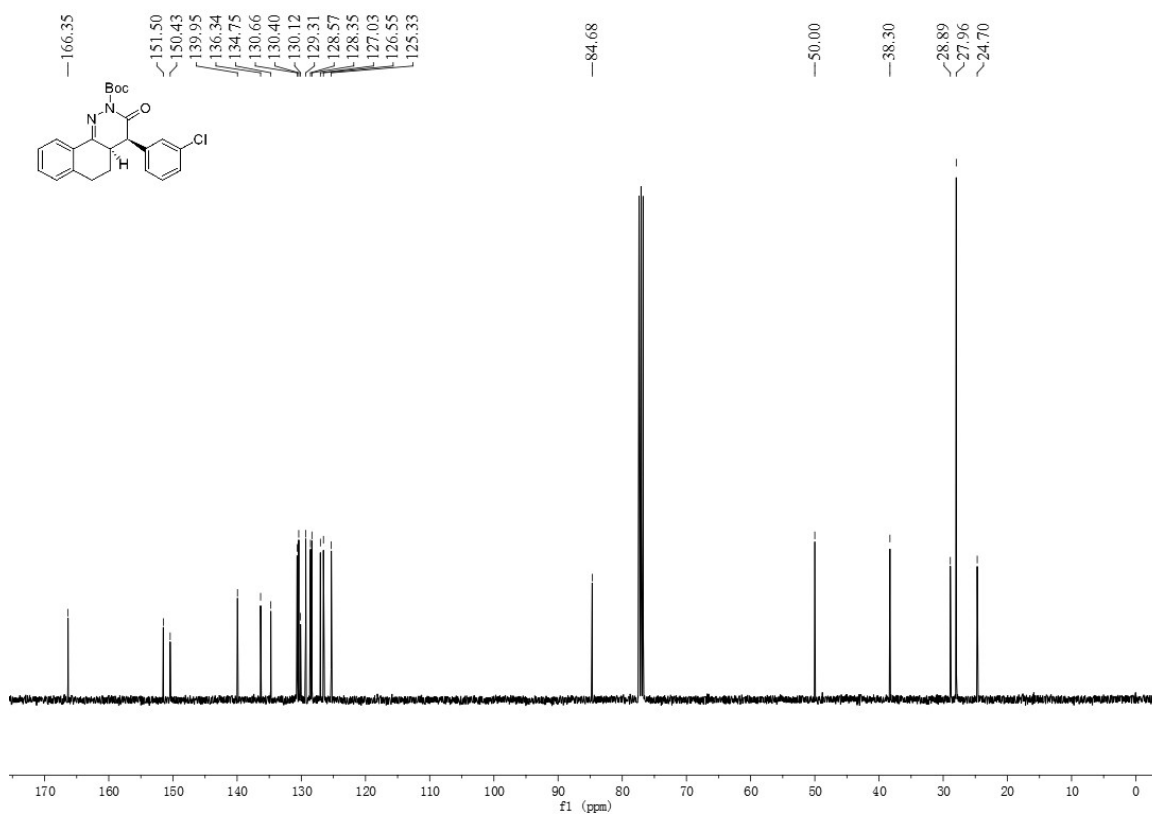

### <sup>1</sup>H NMR spectrum of **3ah**

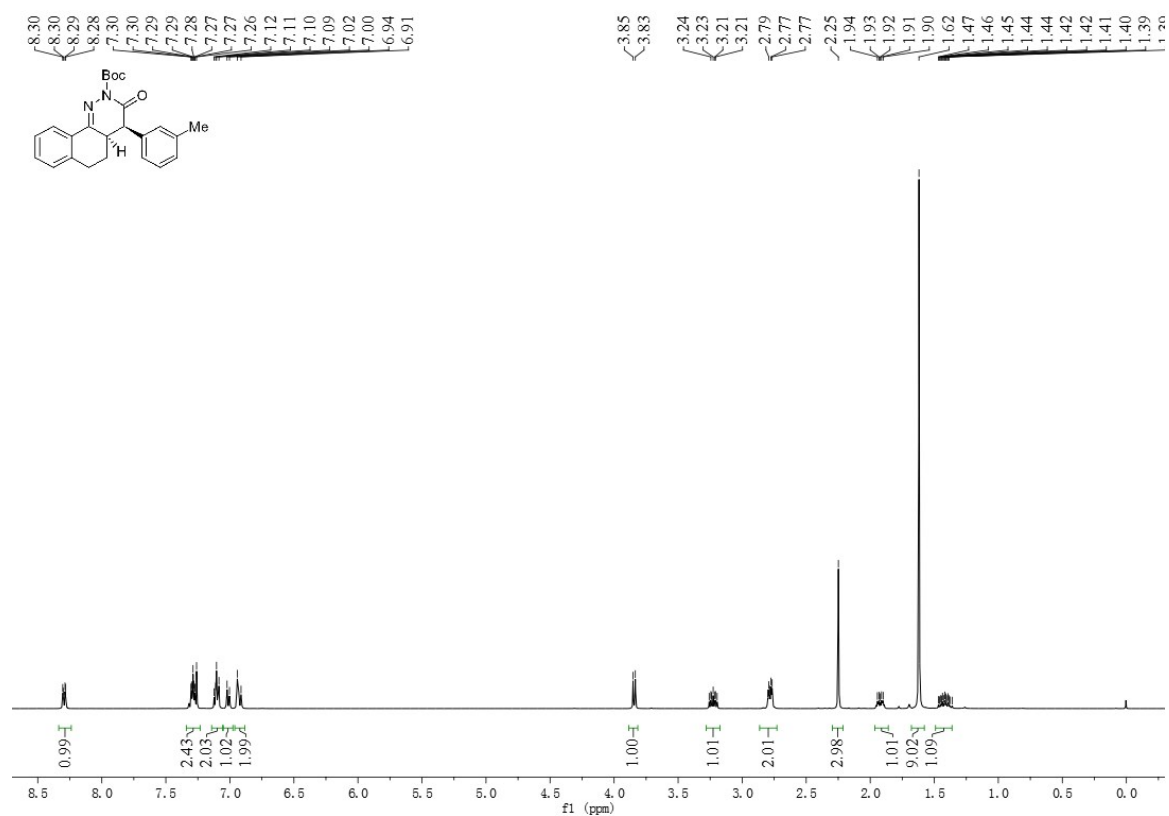

### <sup>13</sup>C NMR spectrum of **3ah**

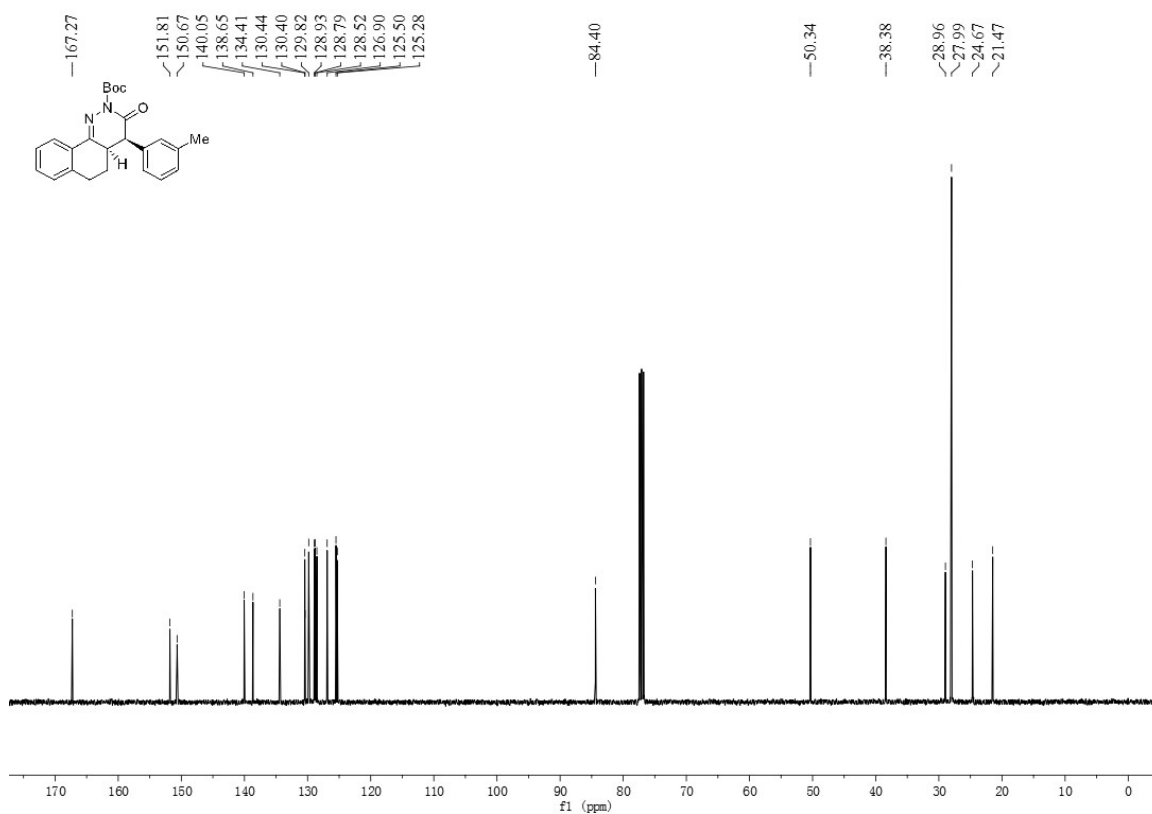

### <sup>1</sup>H NMR spectrum of **3ai**

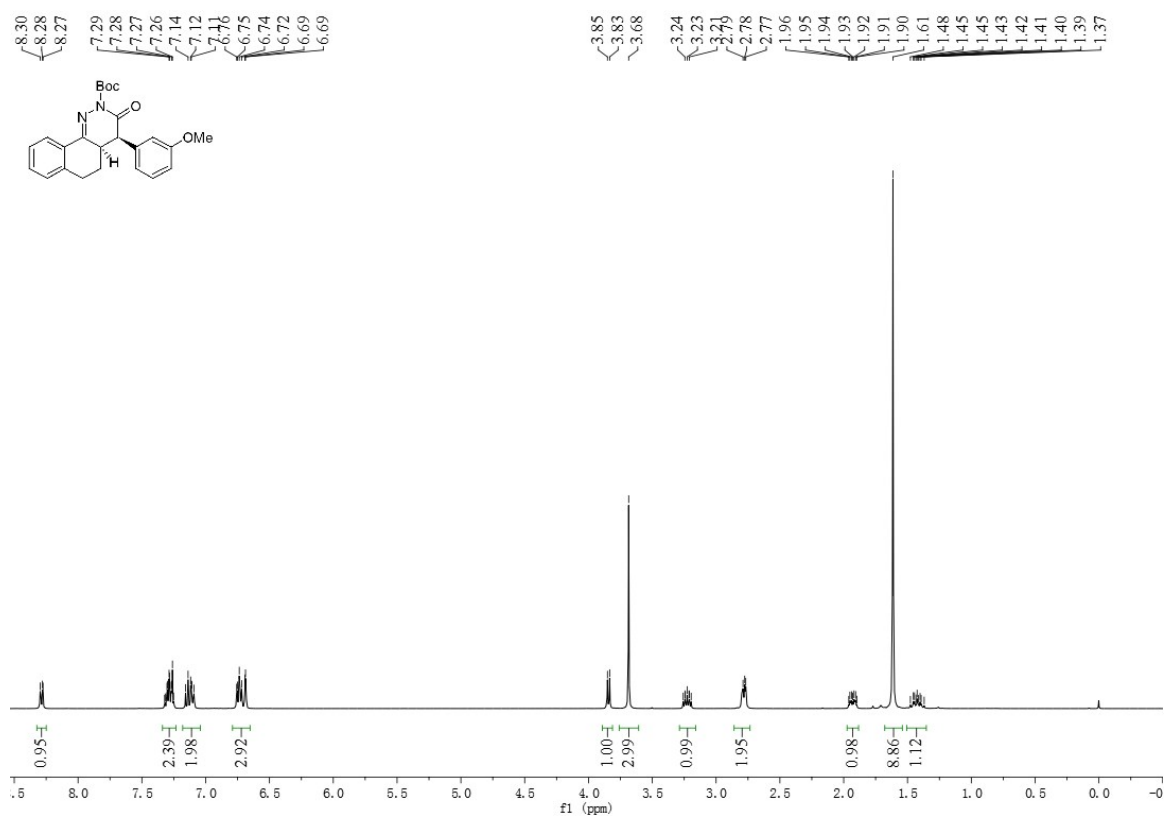

### <sup>13</sup>C NMR spectrum of **3ai**

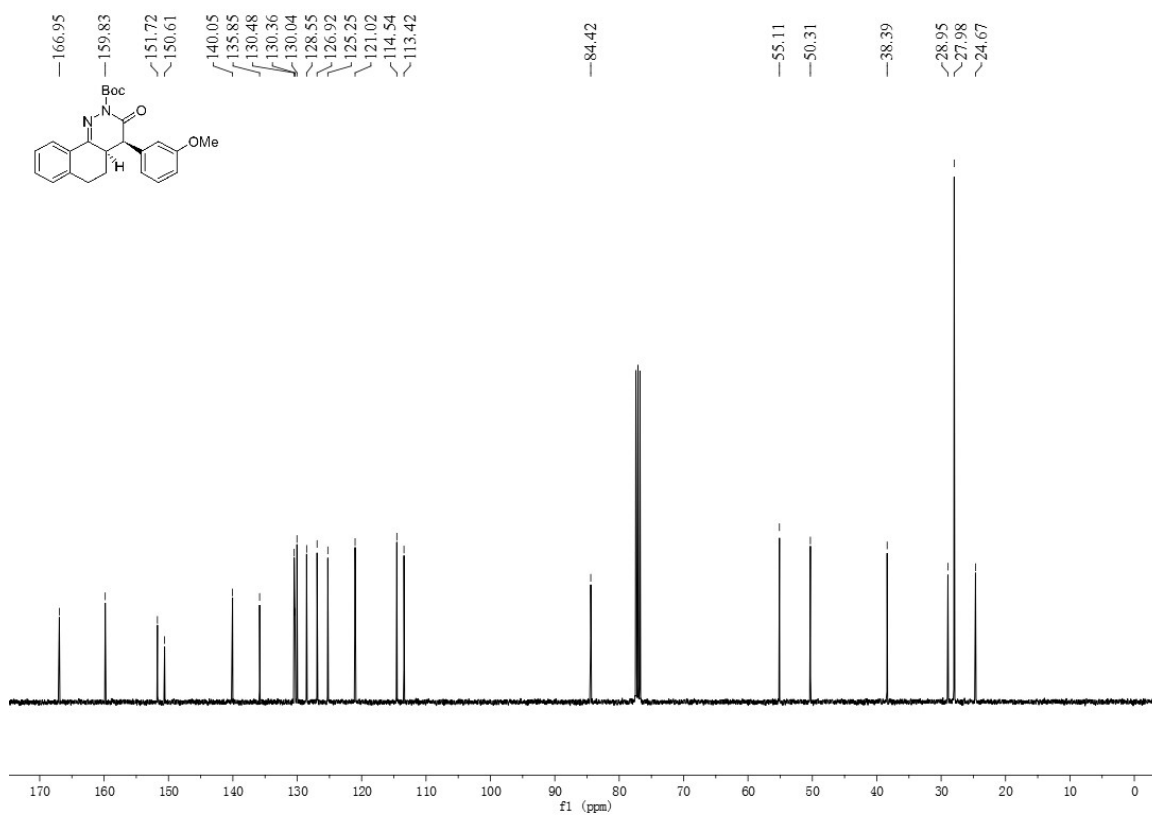



<sup>1</sup>H NMR spectrum of **3aj**

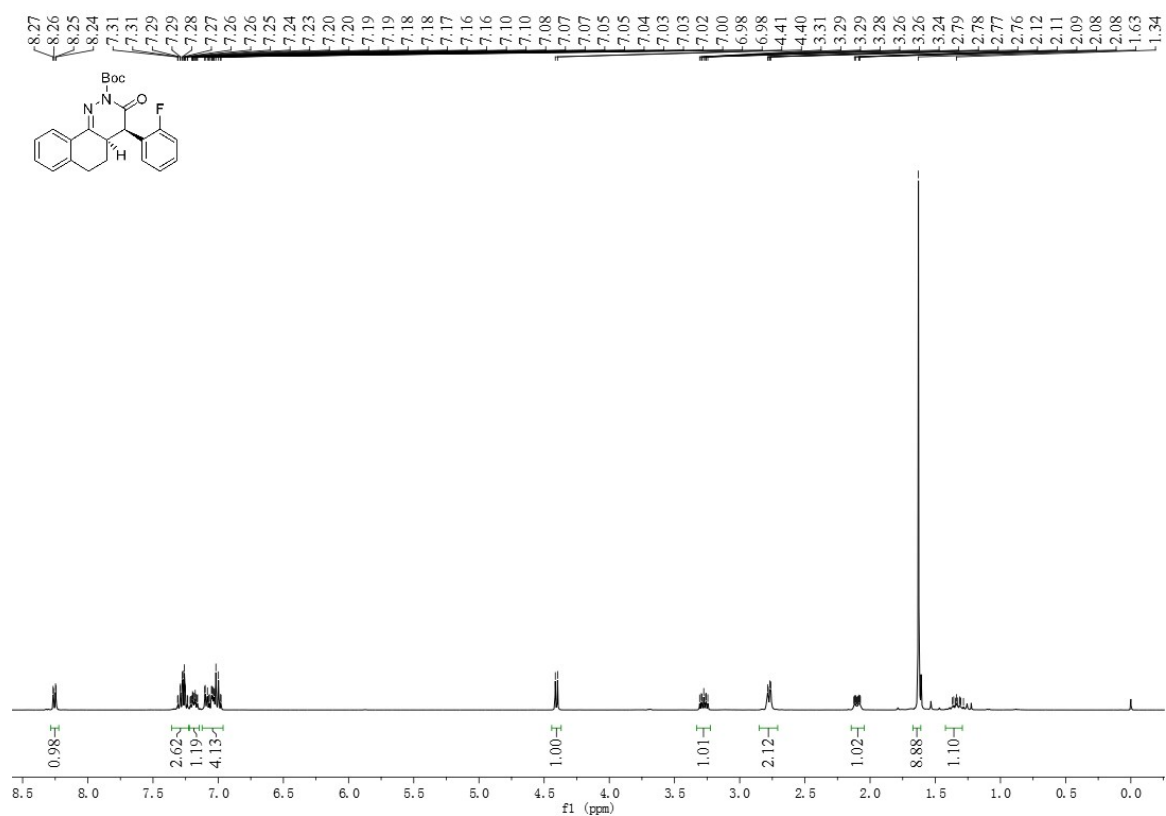

<sup>13</sup>C NMR spectrum of **3aj**

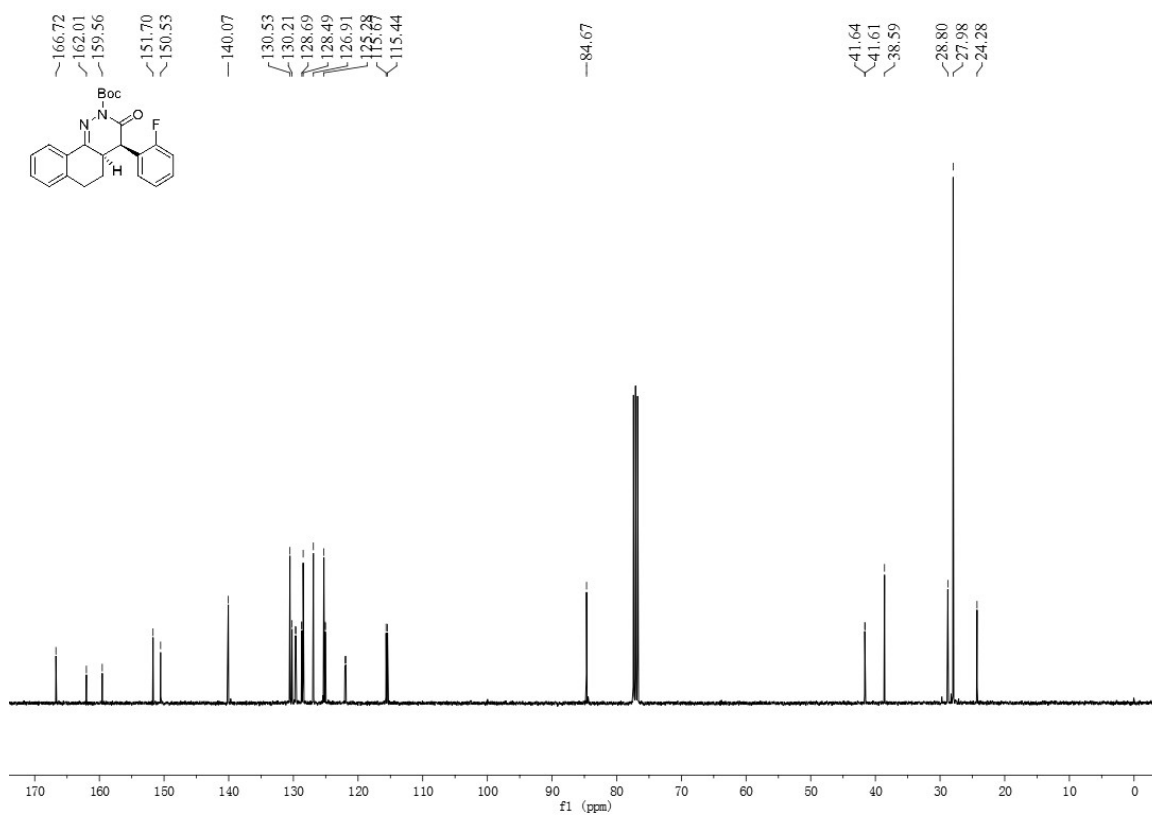

### <sup>1</sup>H NMR spectrum of **3ak**

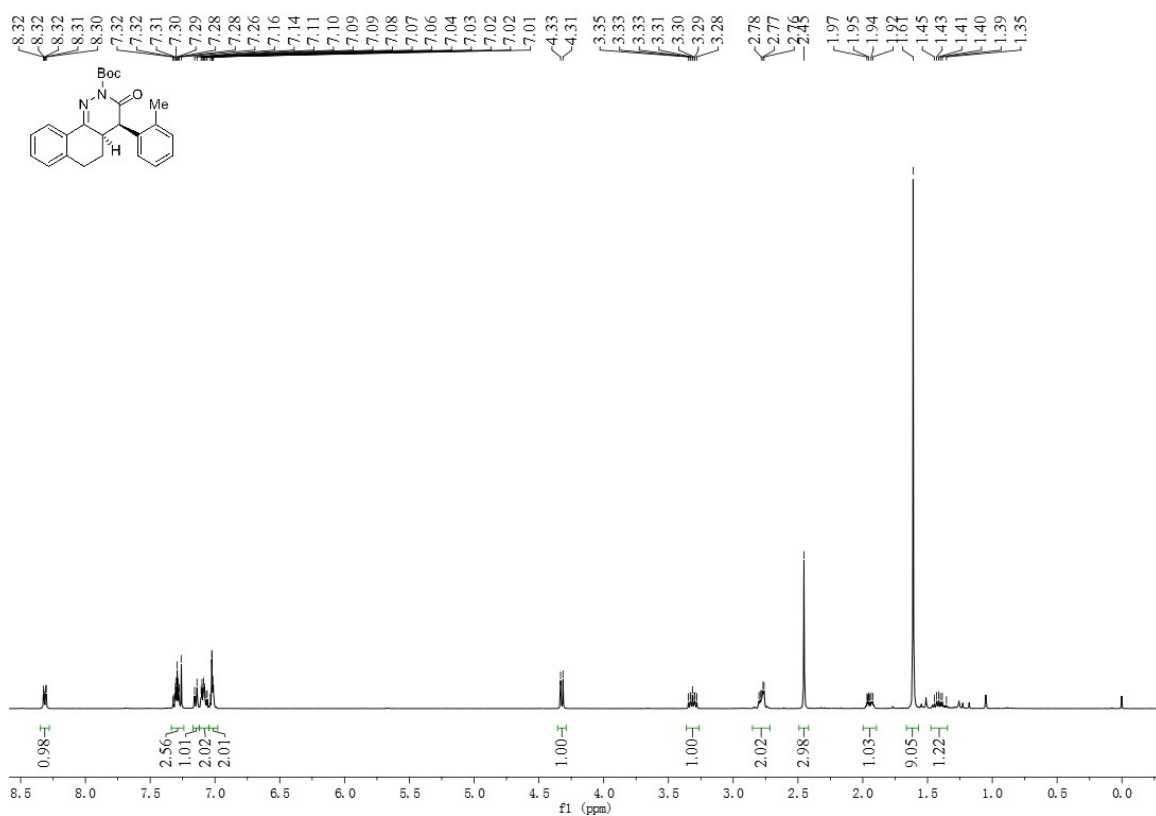

### <sup>13</sup>C NMR spectrum of **3ak**

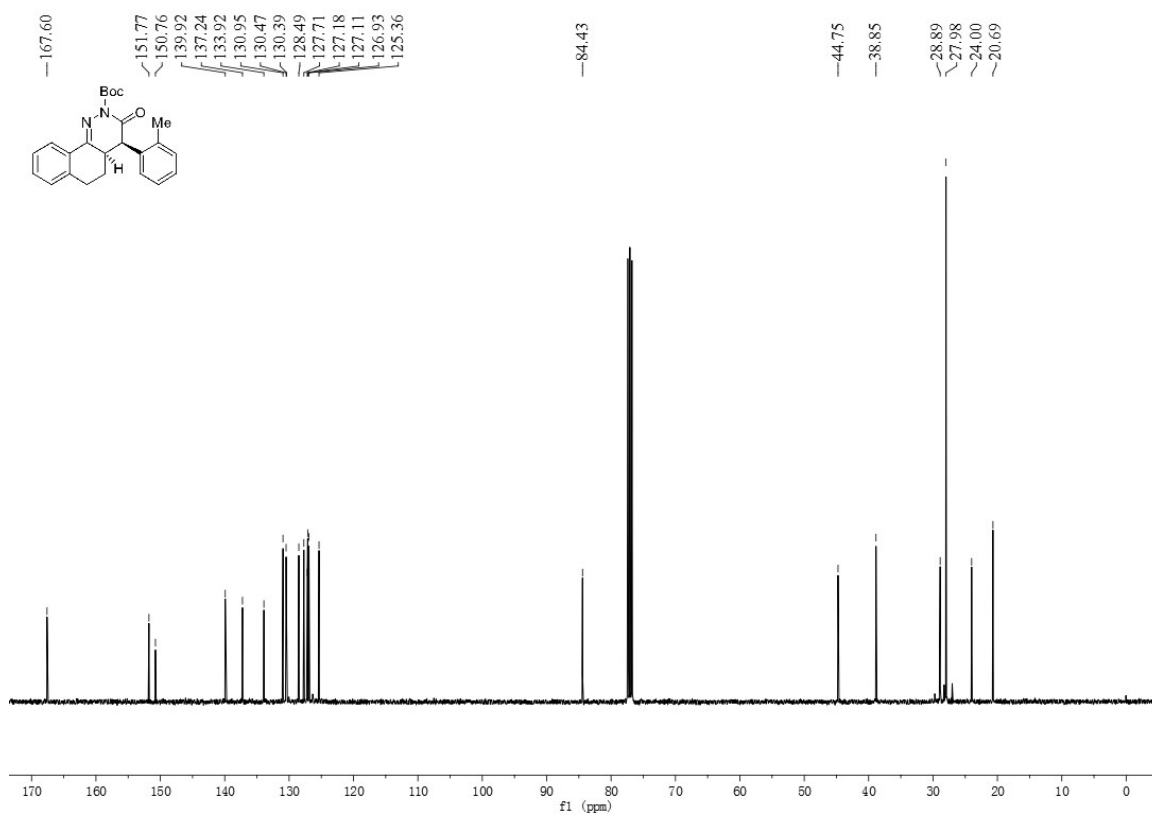

### $^1\text{H}$ NMR spectrum of **3al**

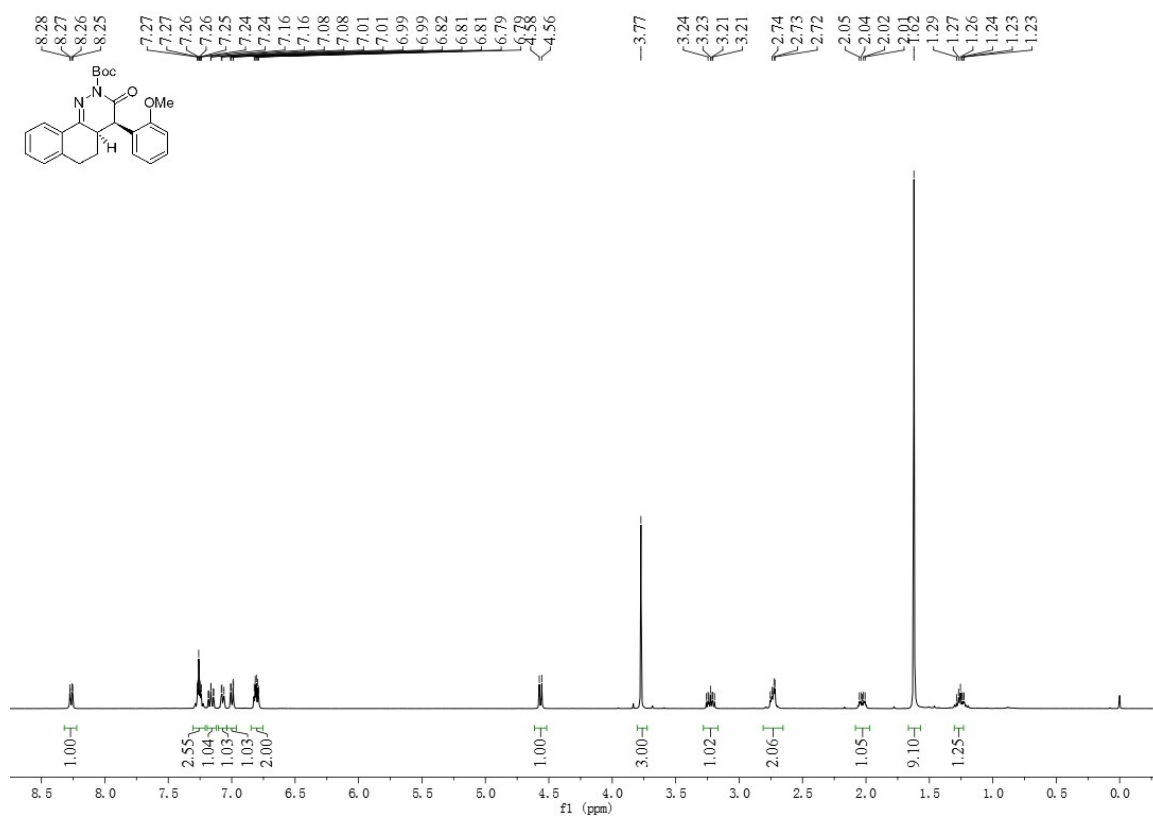

### $^{13}\text{C}$ NMR spectrum of **3al**

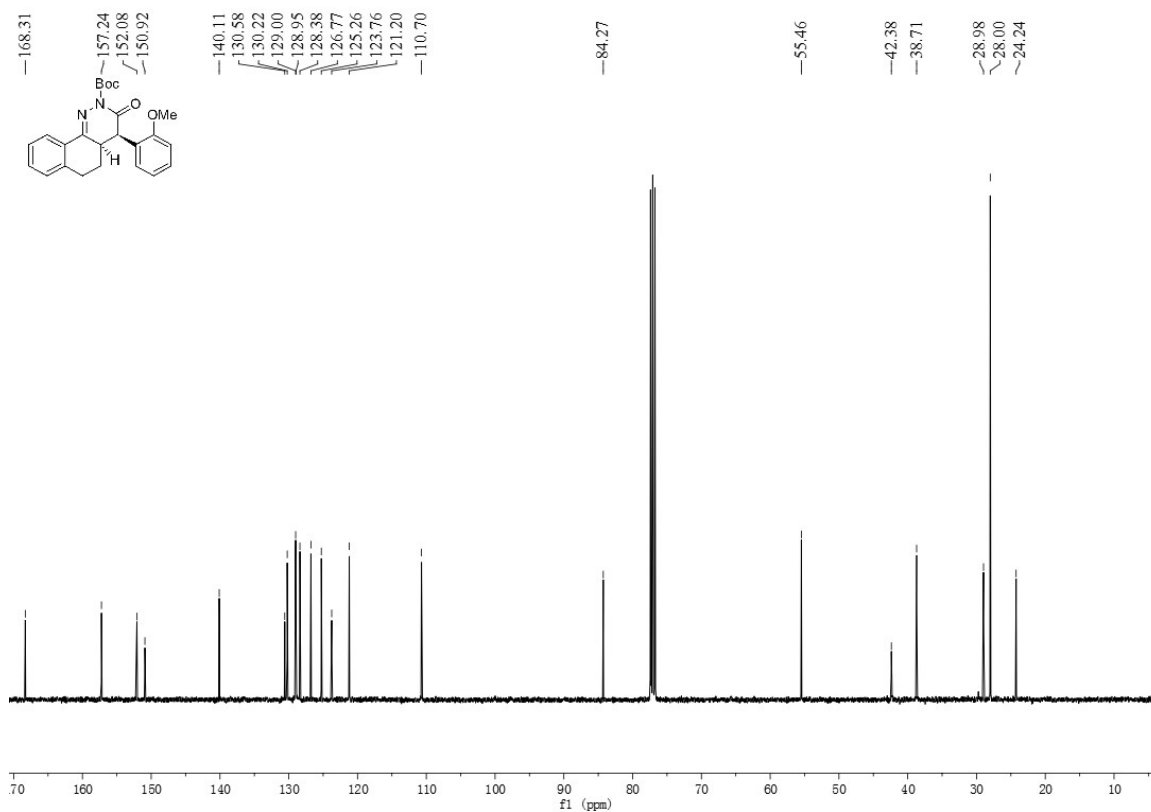

### <sup>1</sup>H NMR spectrum of **3am**

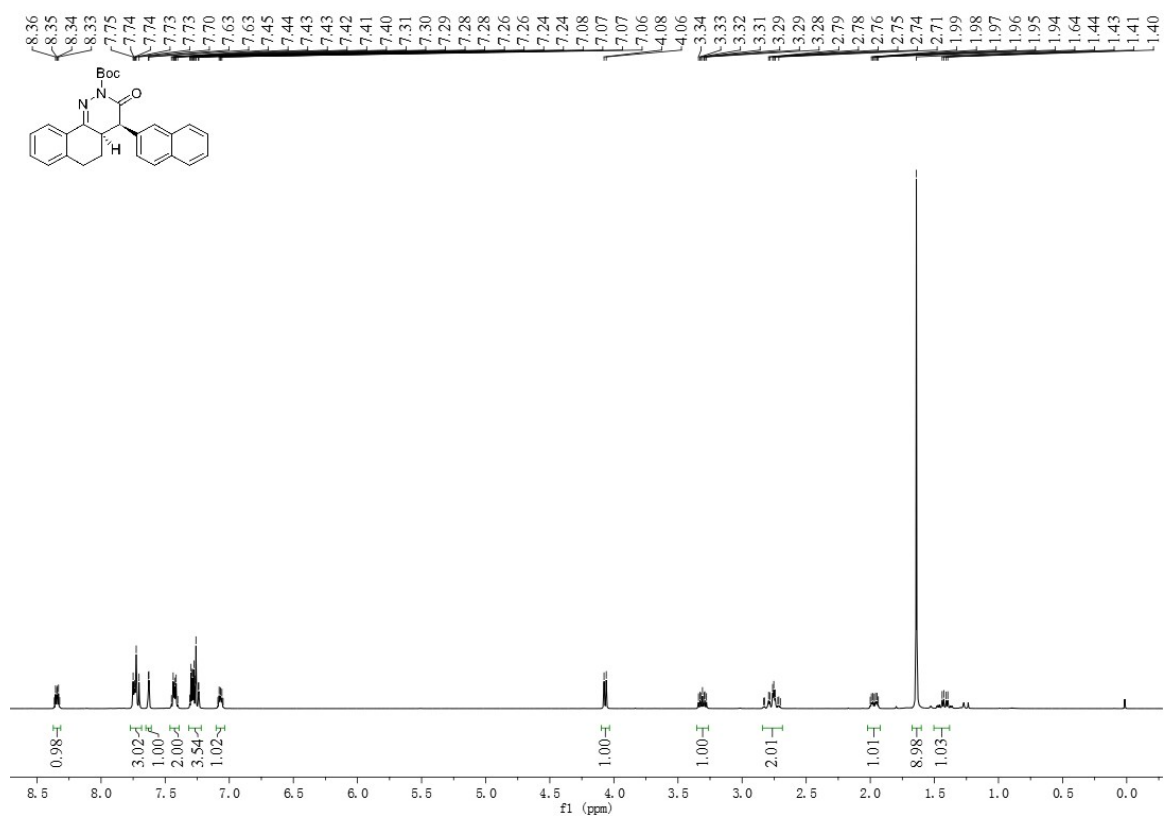

### <sup>13</sup>C NMR spectrum of **3am**

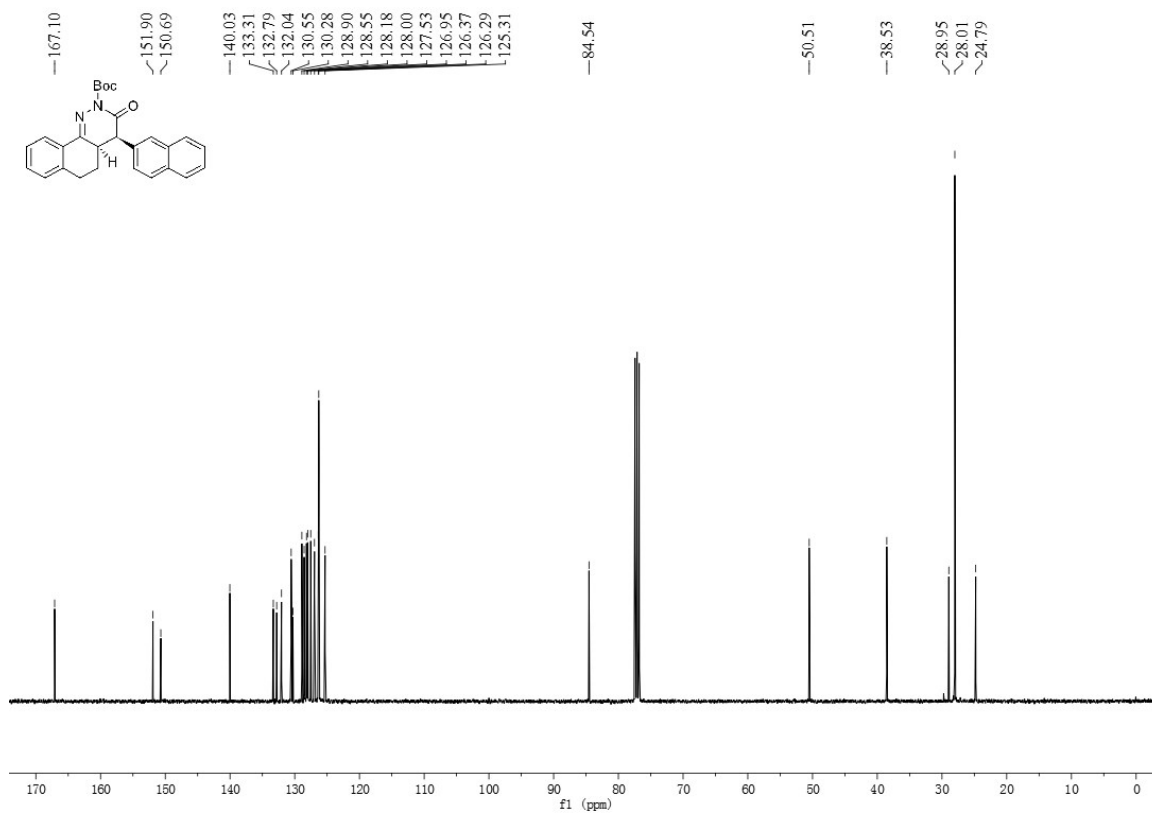

### <sup>1</sup>H NMR spectrum of **3an**

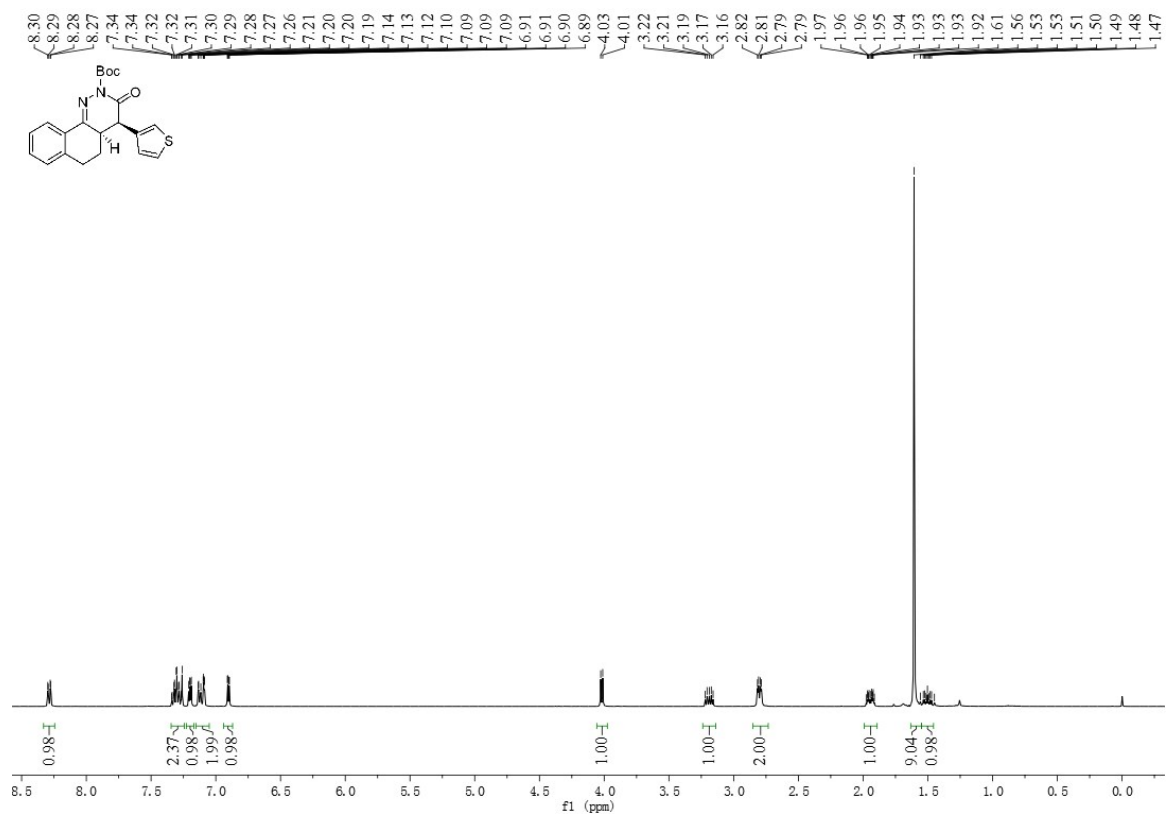

### <sup>13</sup>C NMR spectrum of **3an**

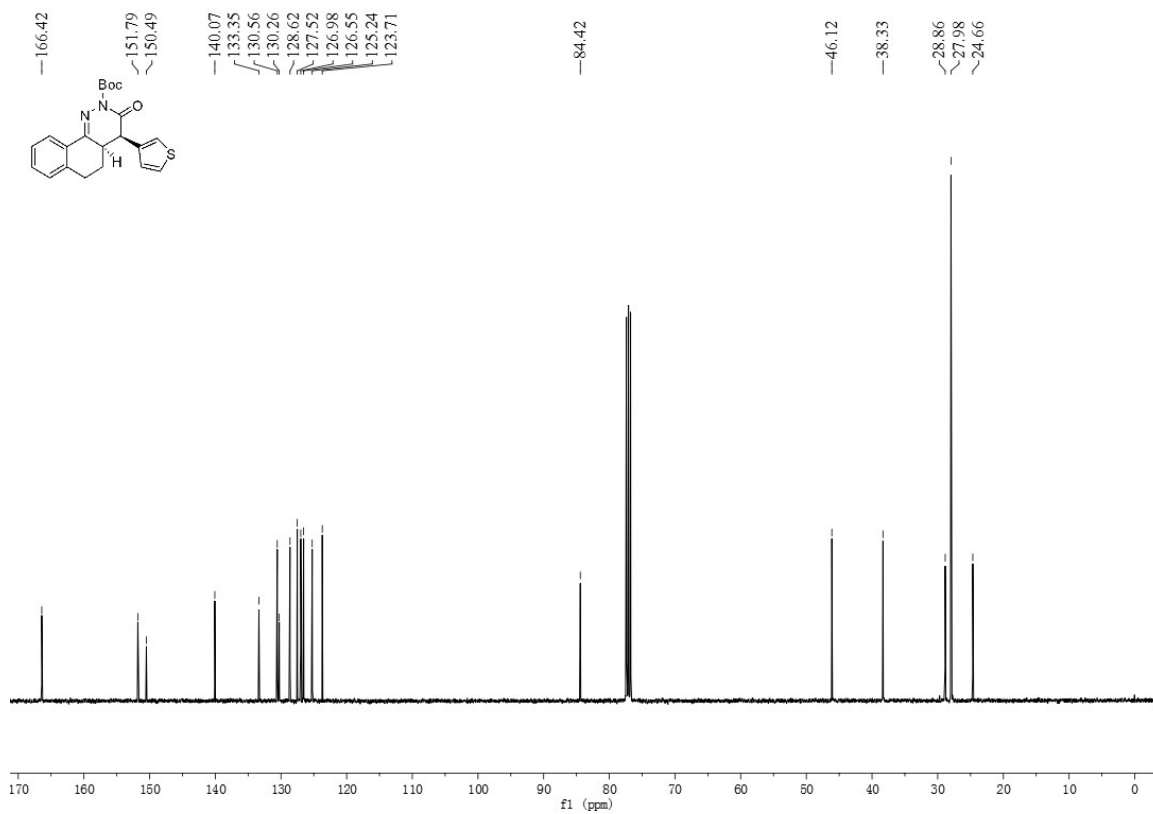

### <sup>1</sup>H NMR spectrum of **3ao**

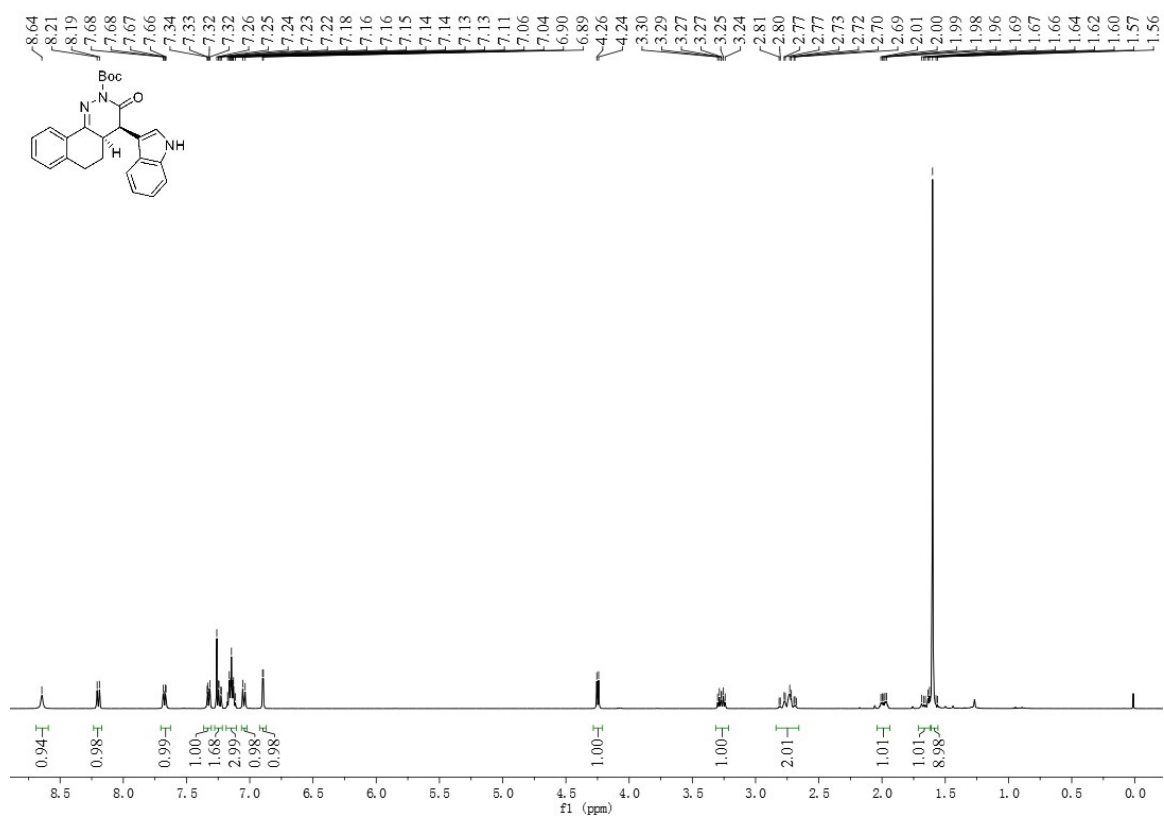

### <sup>13</sup>C NMR spectrum of **3ao**

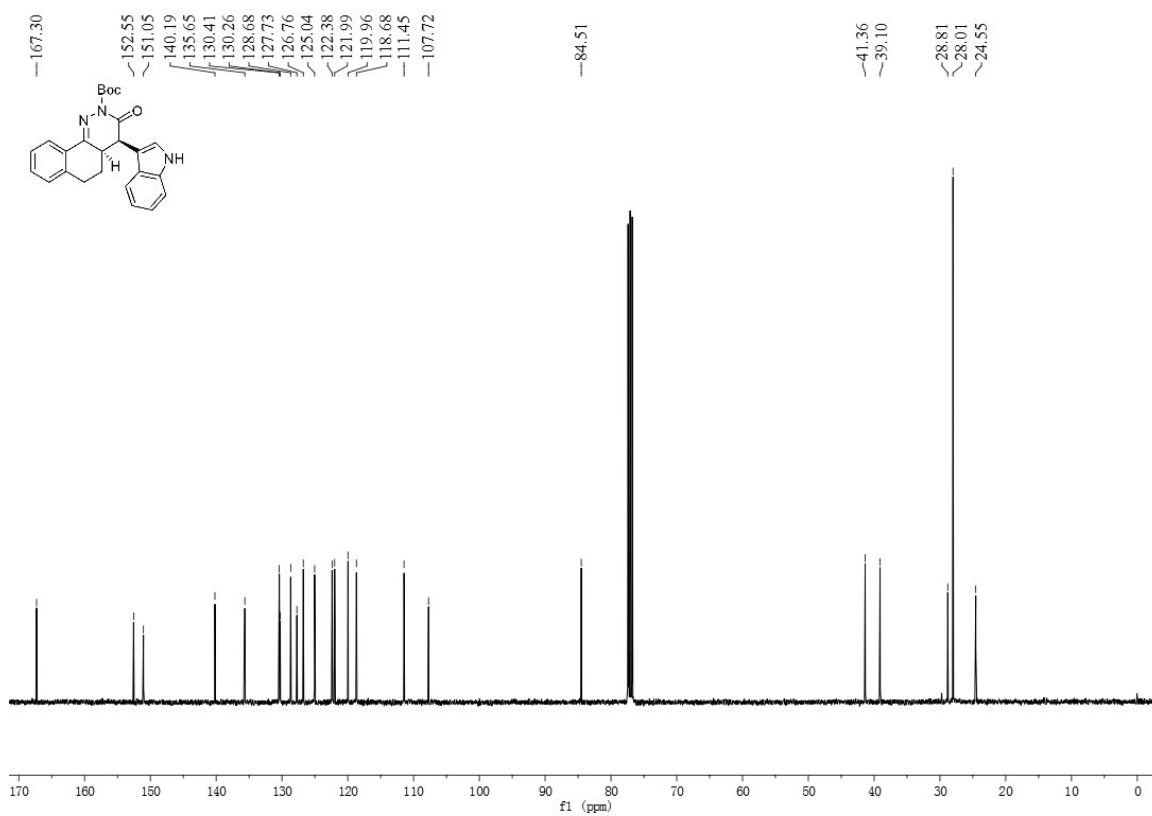

### $^1\text{H}$ NMR spectrum of **3ap**

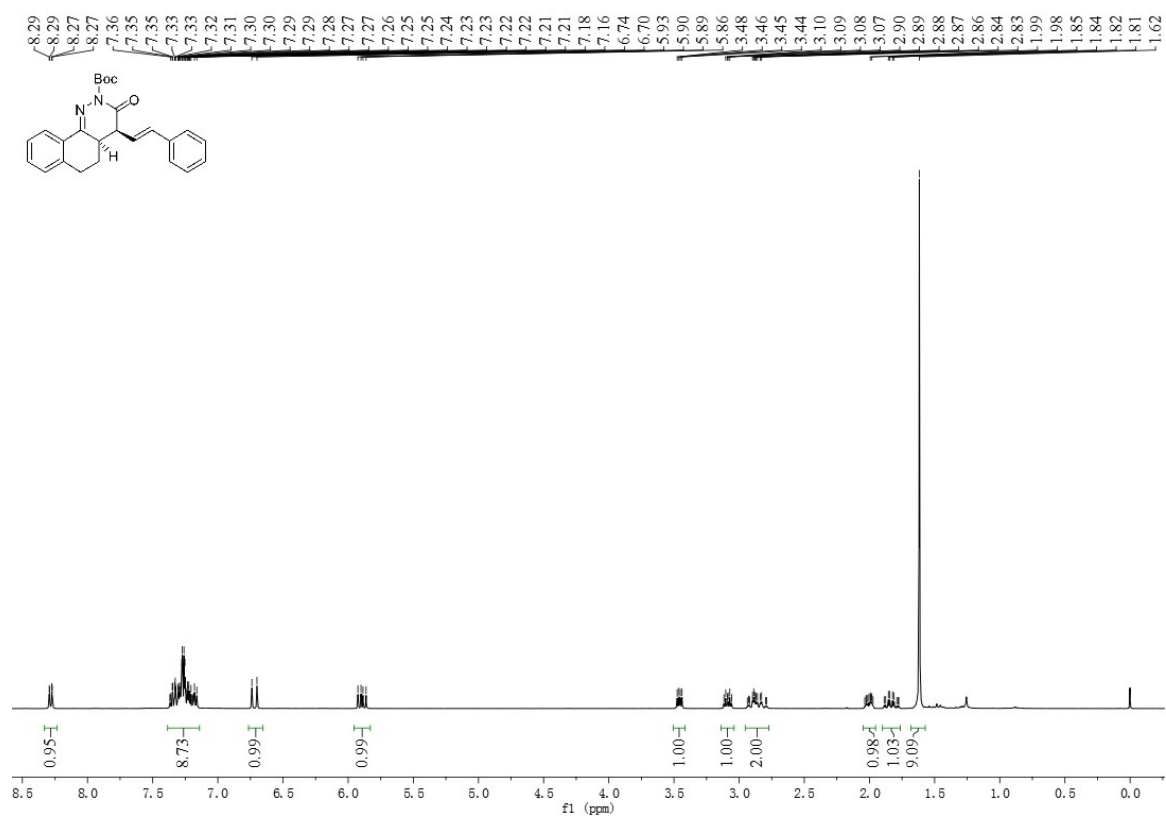

### $^{13}\text{C}$ NMR spectrum of **3ap**

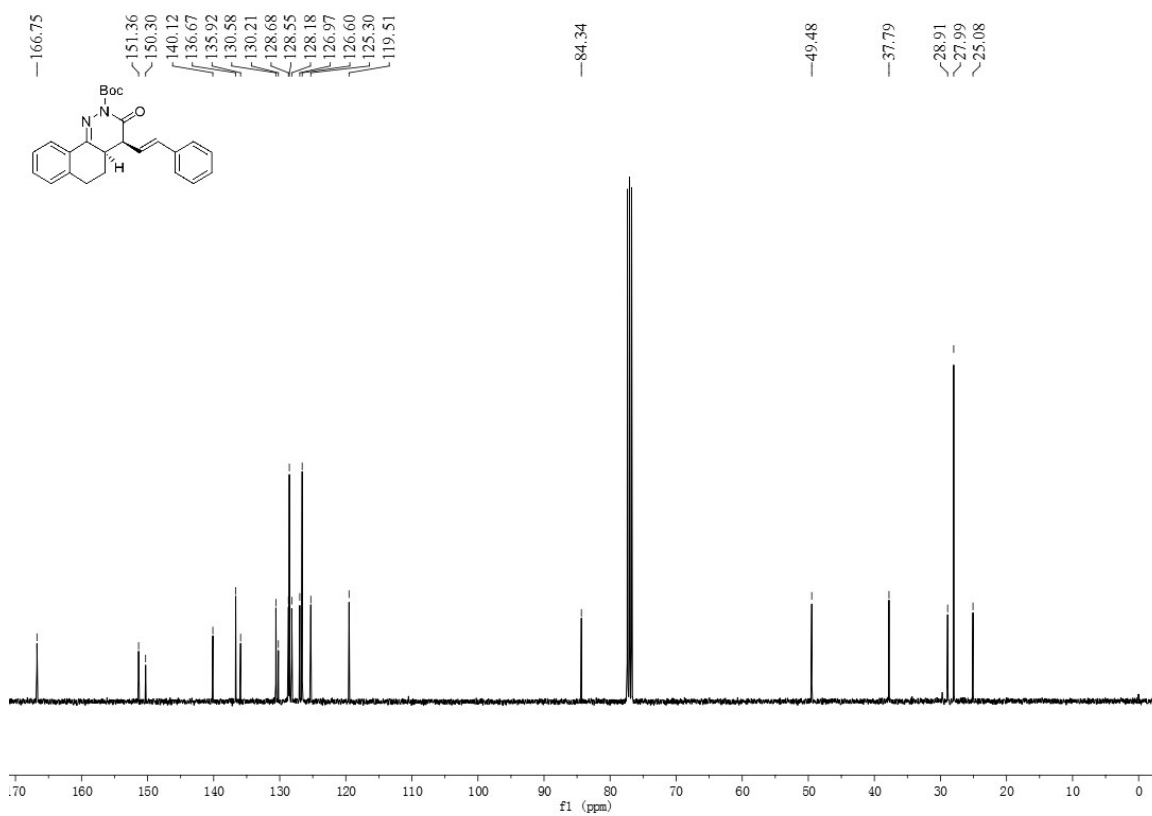

### <sup>1</sup>H NMR spectrum of **3aq**

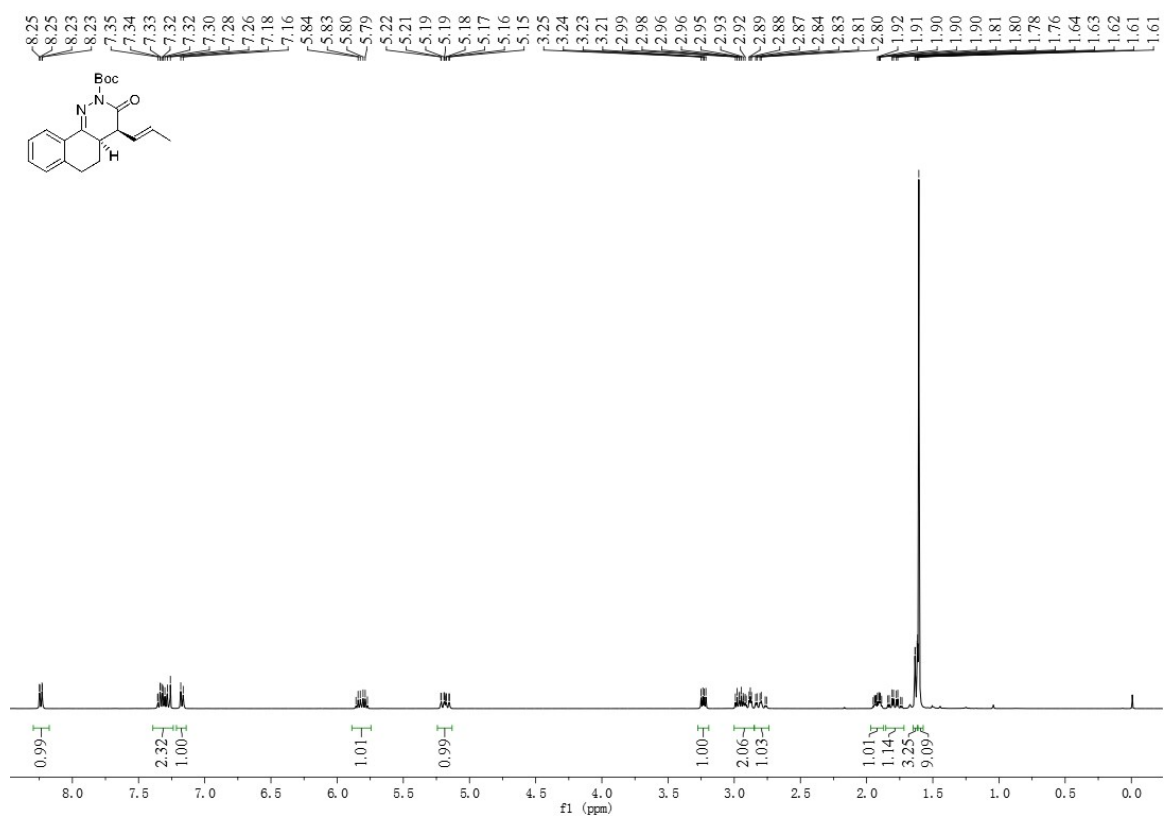

### <sup>13</sup>C NMR spectrum of **3aq**

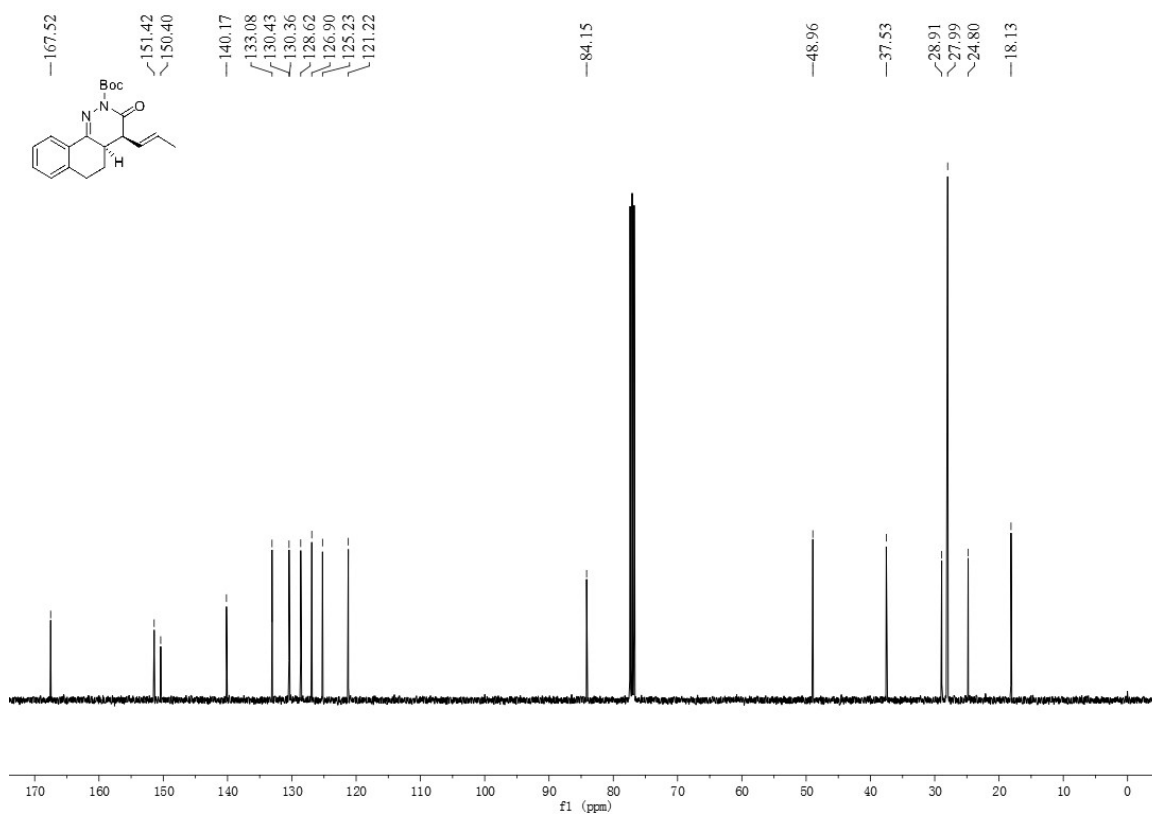



<sup>1</sup>H NMR spectrum of **3ar**

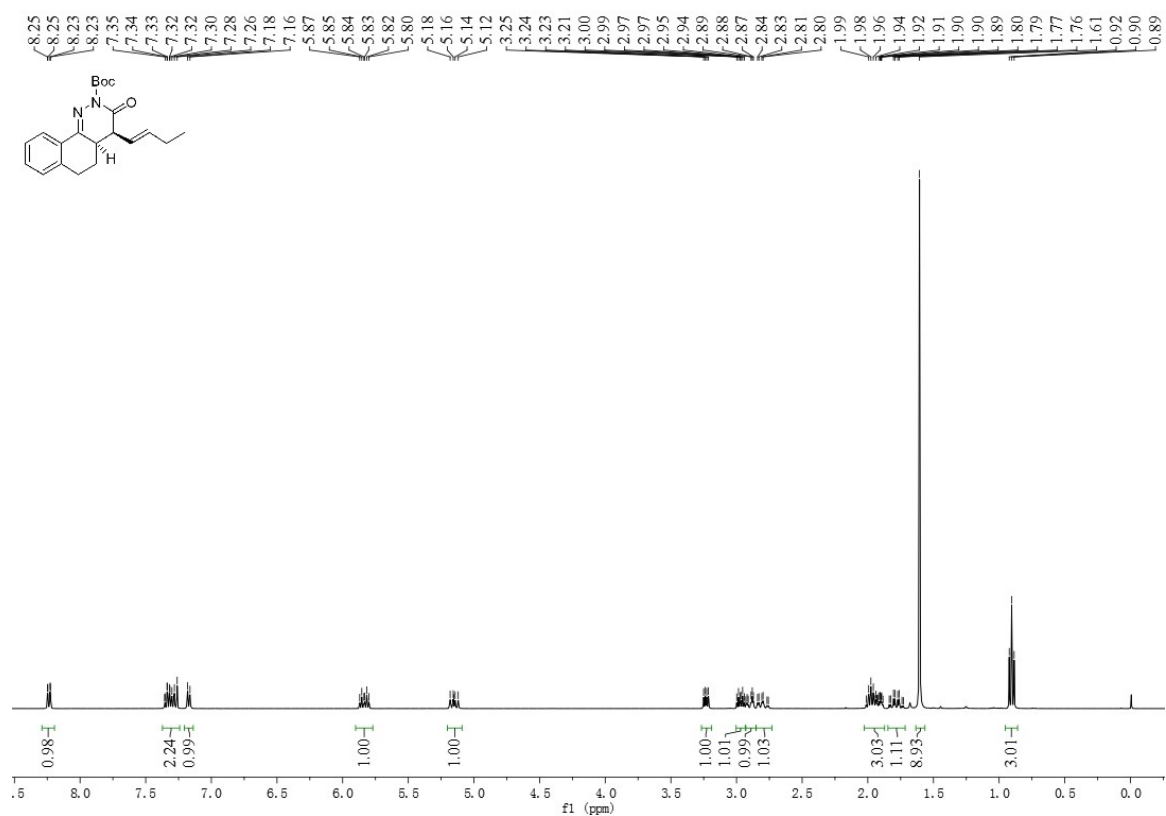

<sup>13</sup>C NMR spectrum of **3ar**

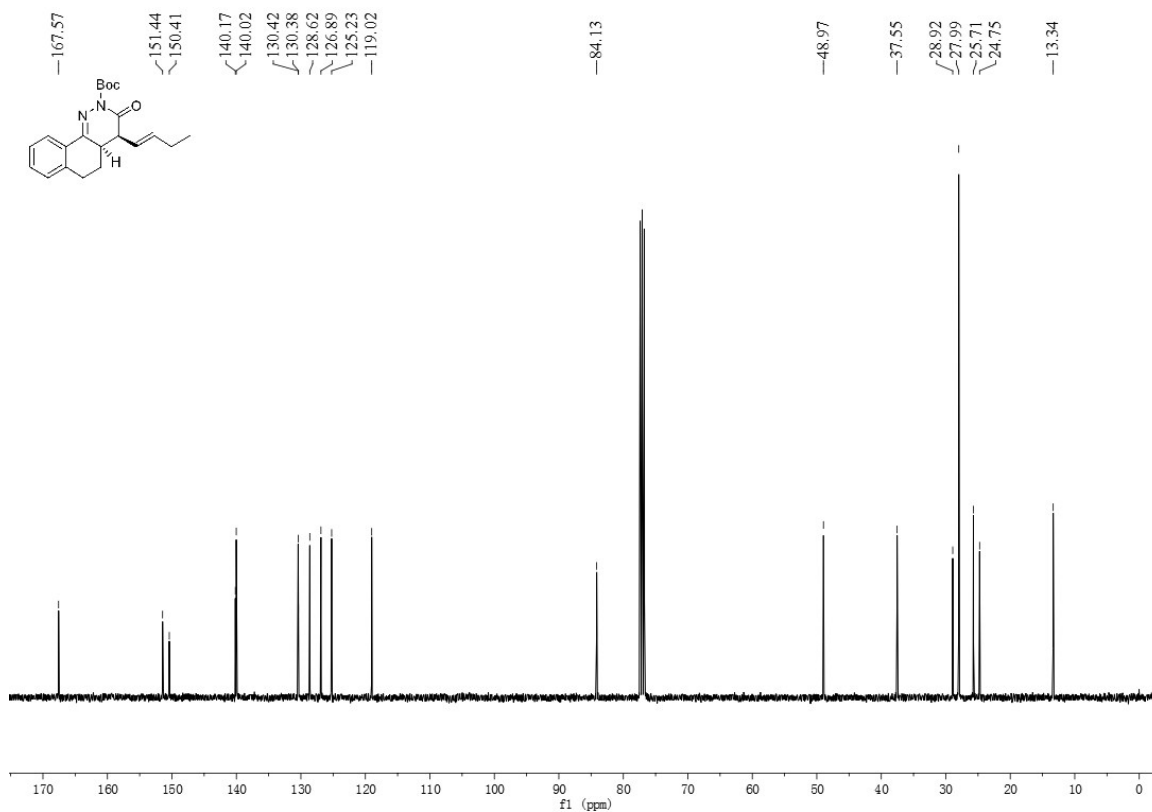

### <sup>1</sup>H NMR spectrum of **3da**

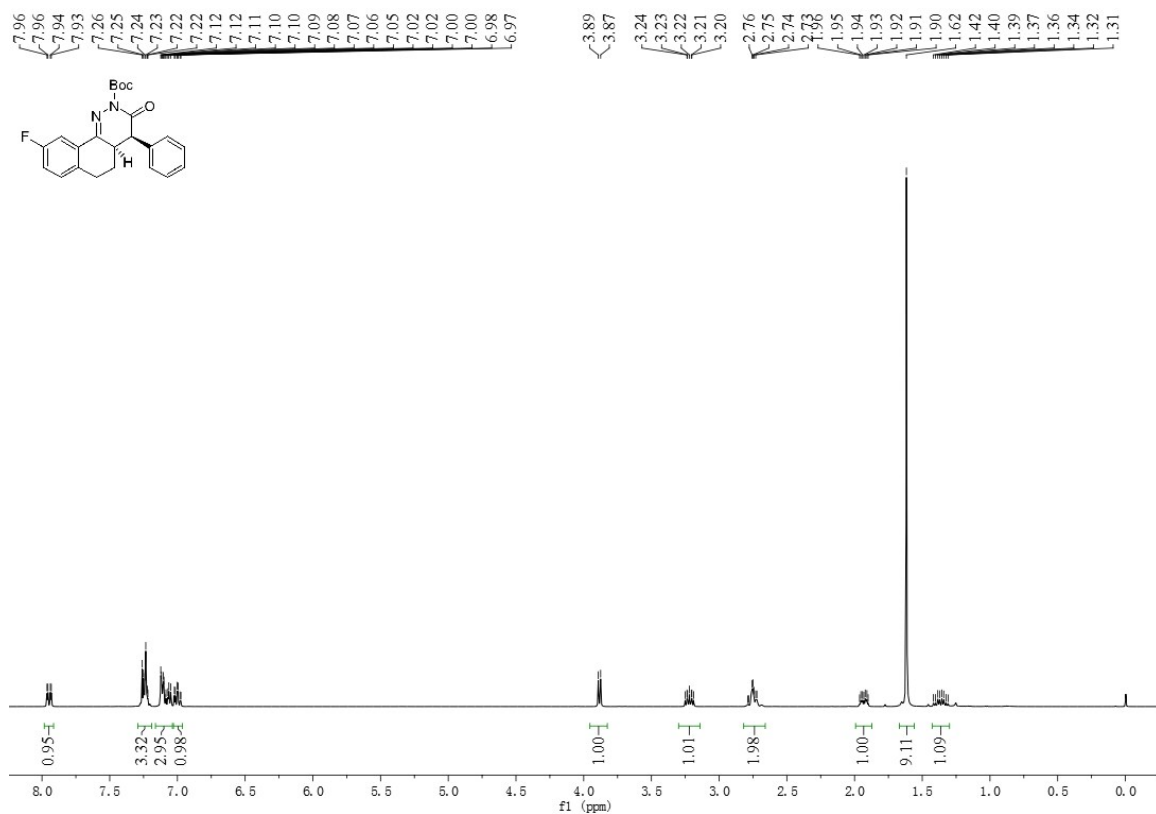

### <sup>13</sup>C NMR spectrum of **3da**

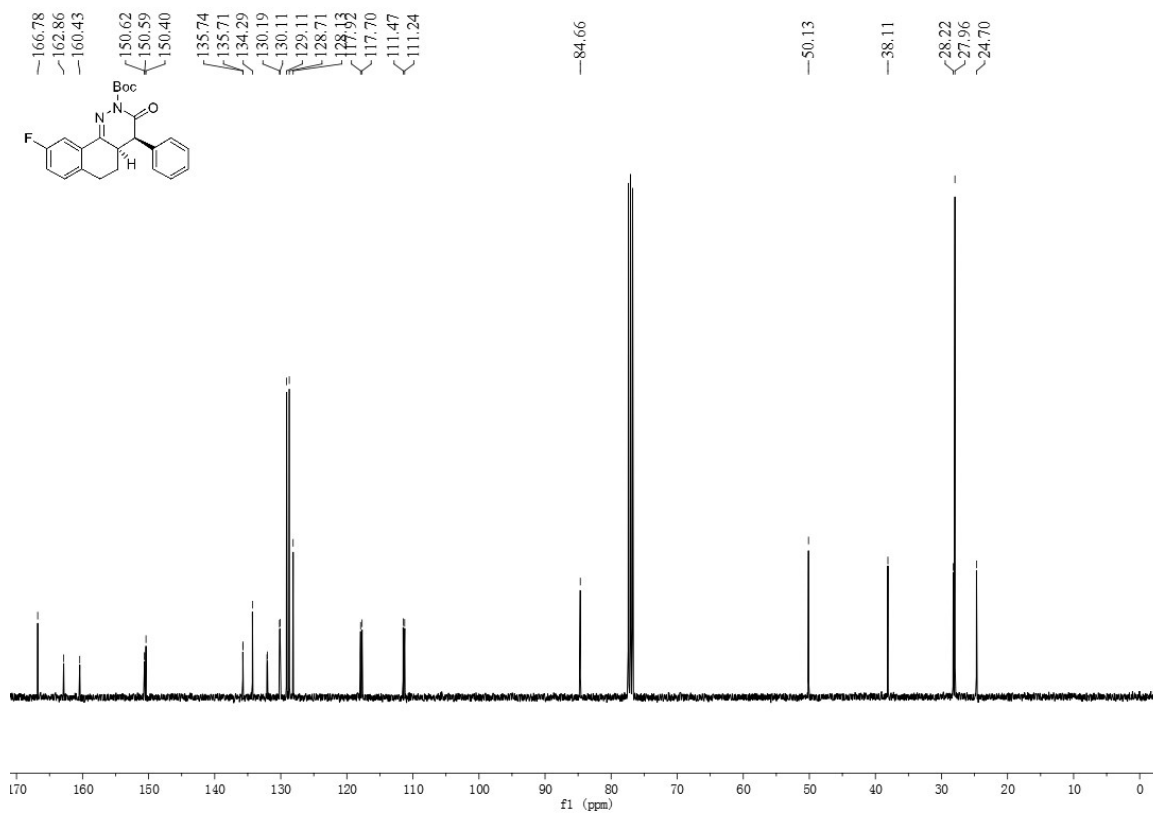

### <sup>1</sup>H NMR spectrum of **3ea**

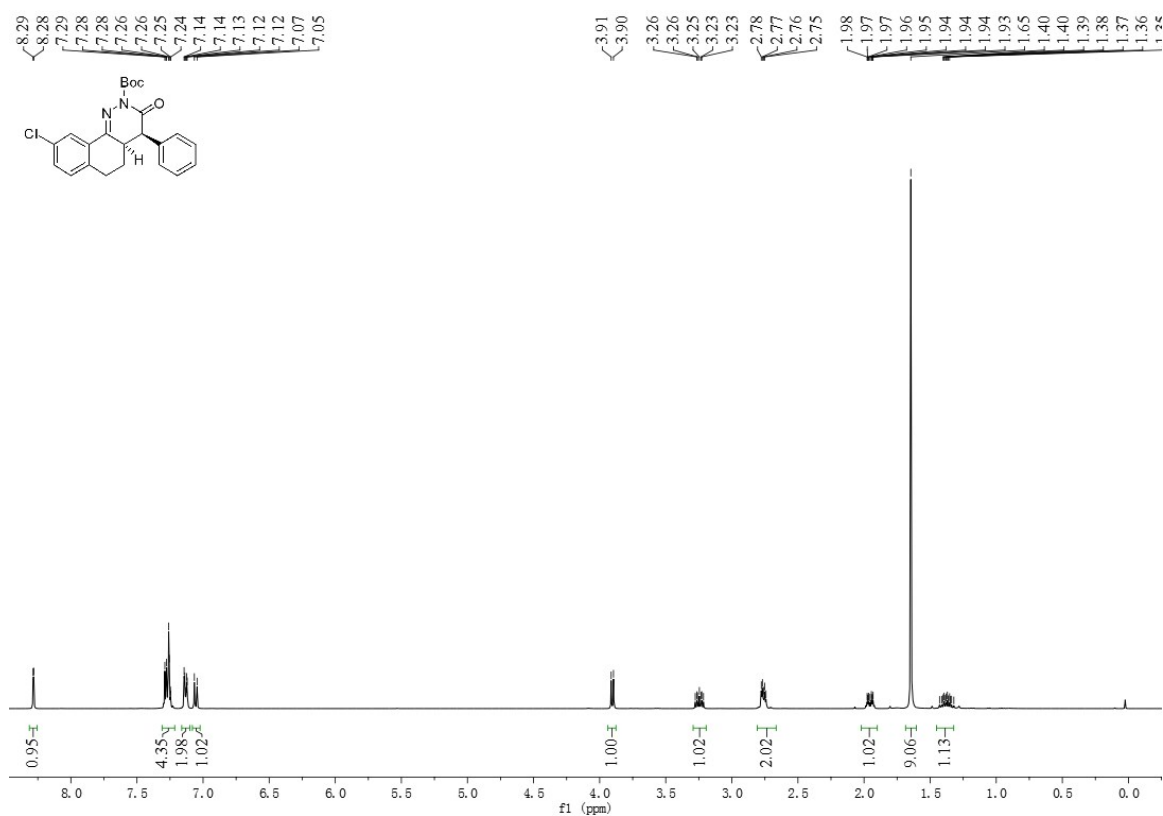

### <sup>13</sup>C NMR spectrum of **3ea**

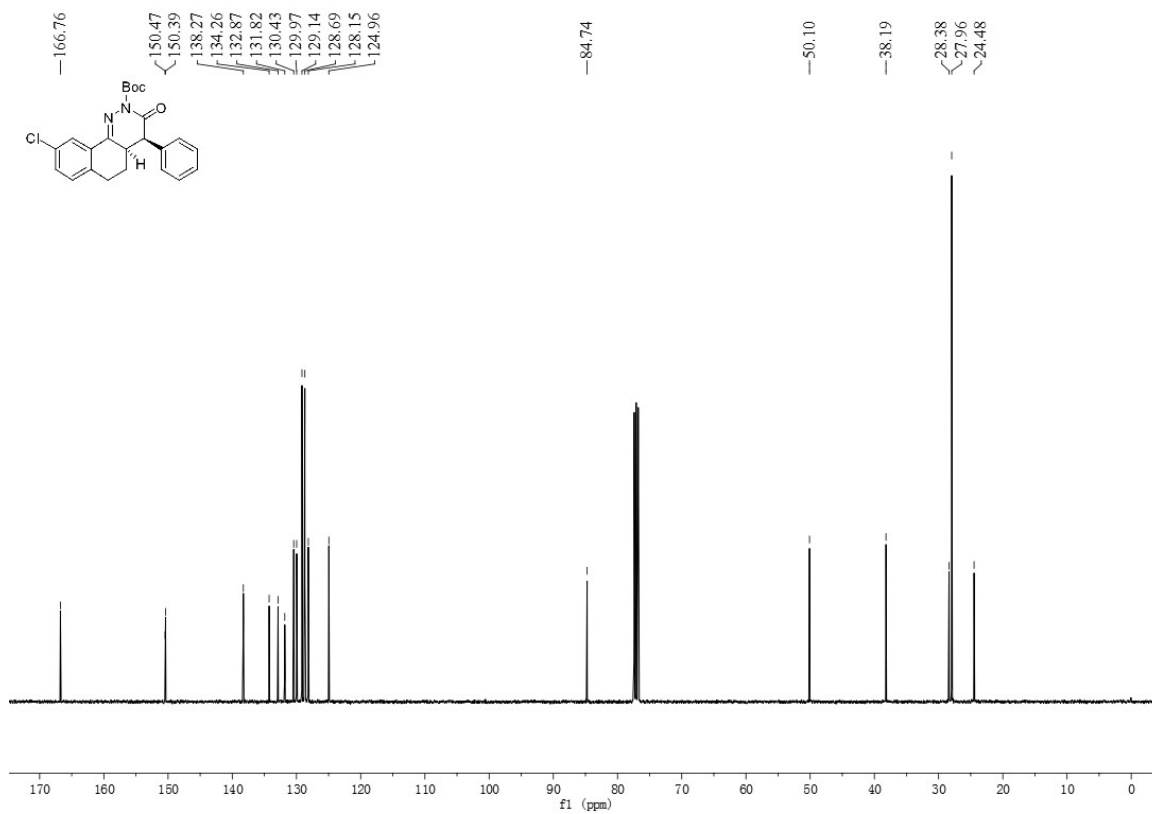

### <sup>1</sup>H NMR spectrum of **3fa**

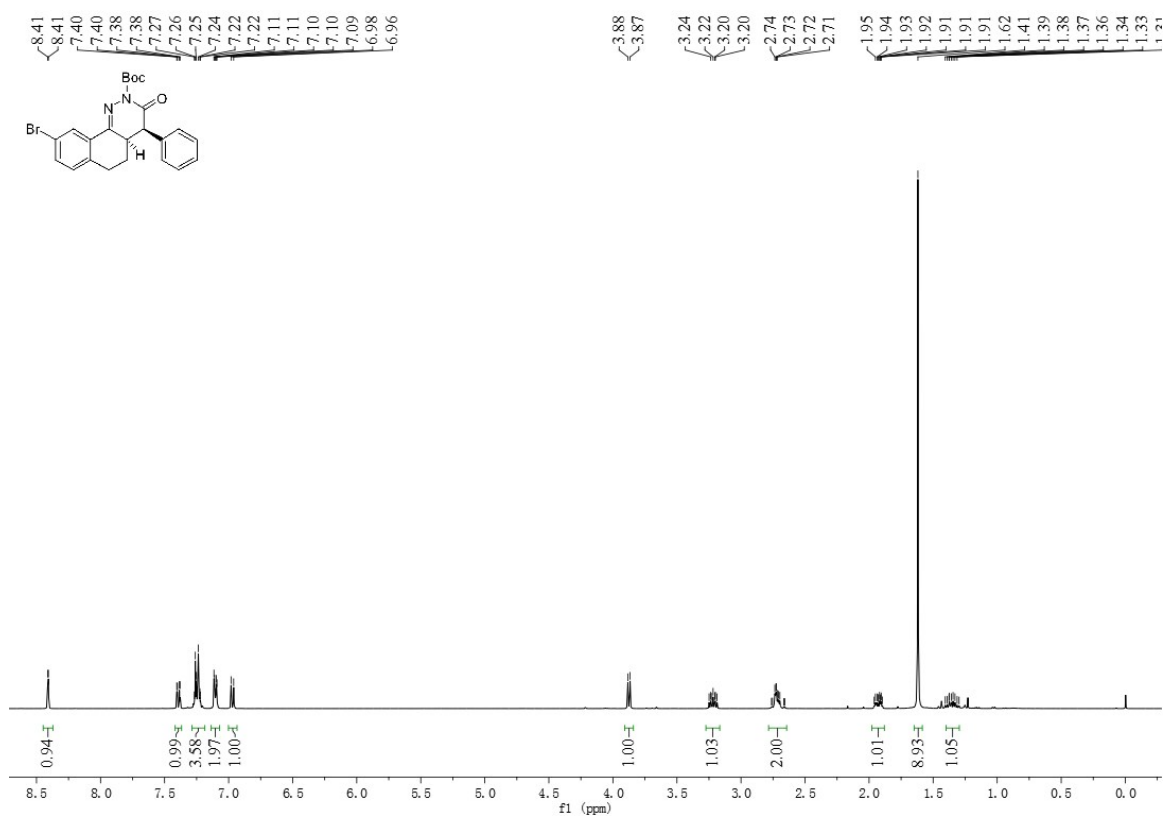

### <sup>13</sup>C NMR spectrum of **3fa**

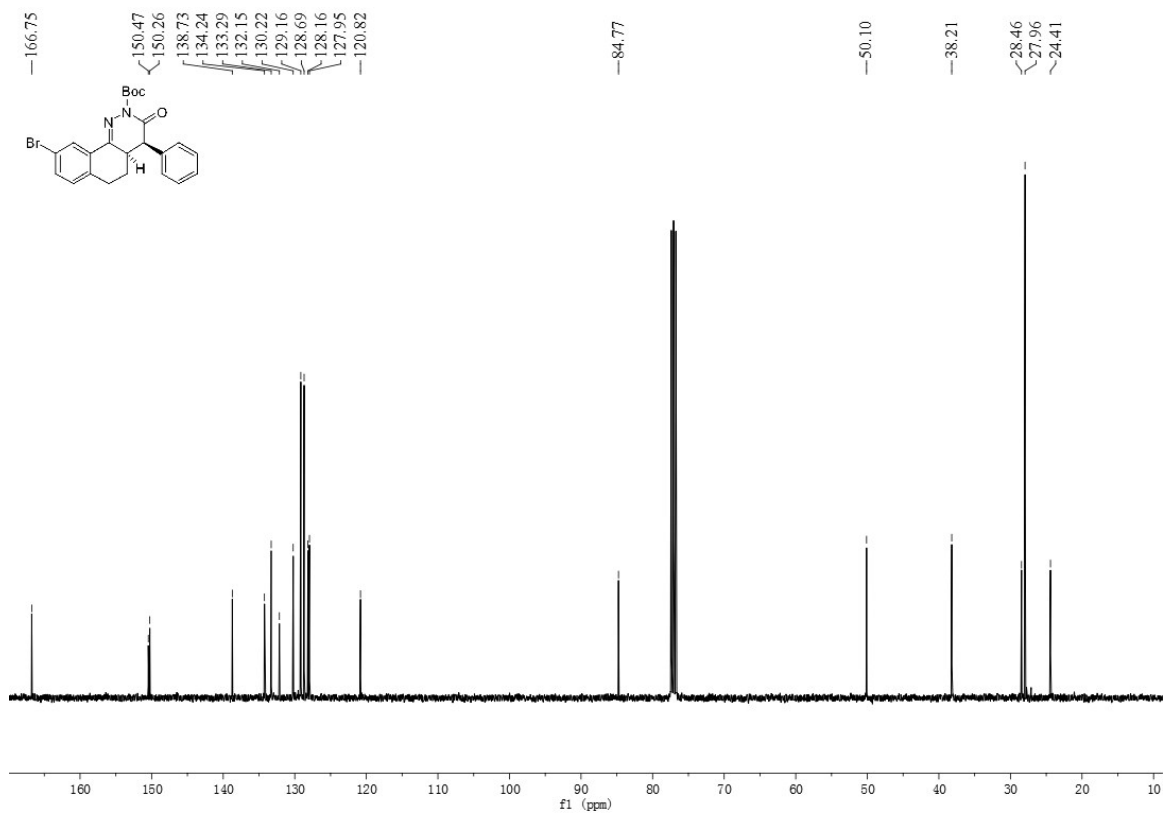

### $^1\text{H}$ NMR spectrum of **3ga**

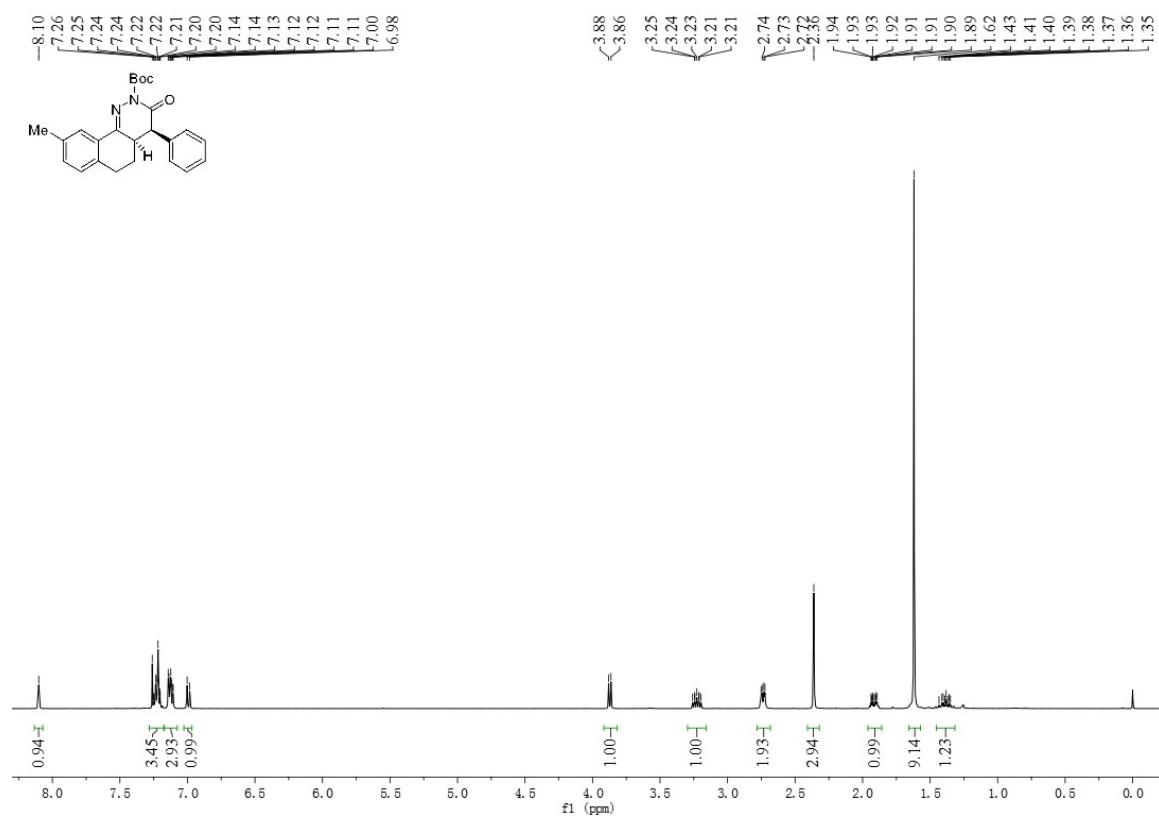

### $^{13}\text{C}$ NMR spectrum of **3ga**

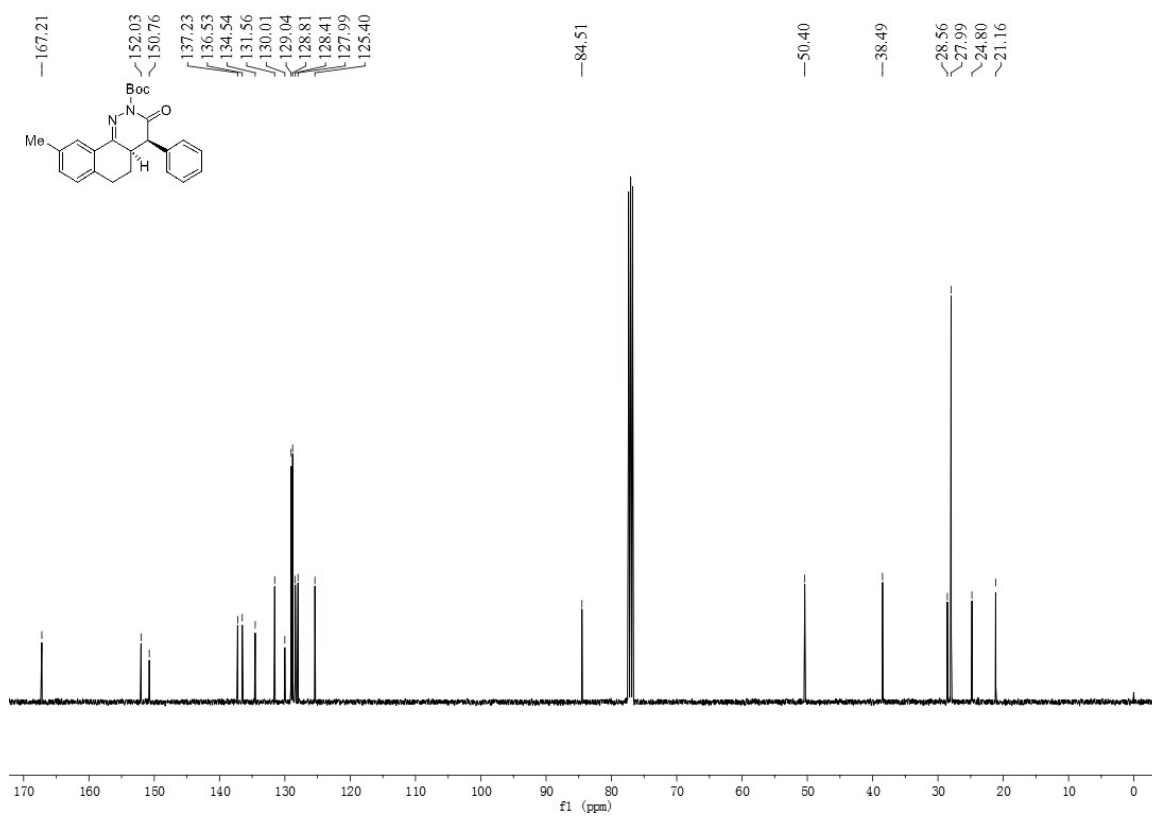

### $^1\text{H}$ NMR spectrum of **3ha**

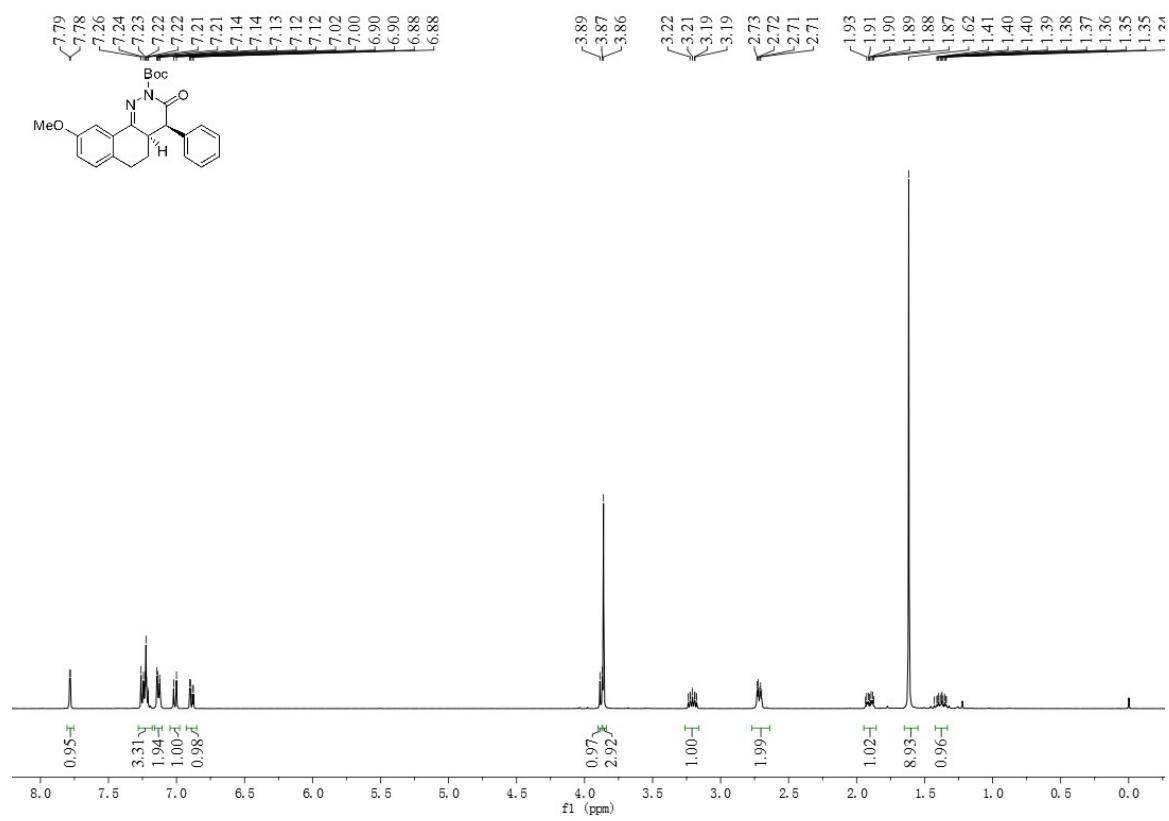

### $^{13}\text{C}$ NMR spectrum of **3ha**

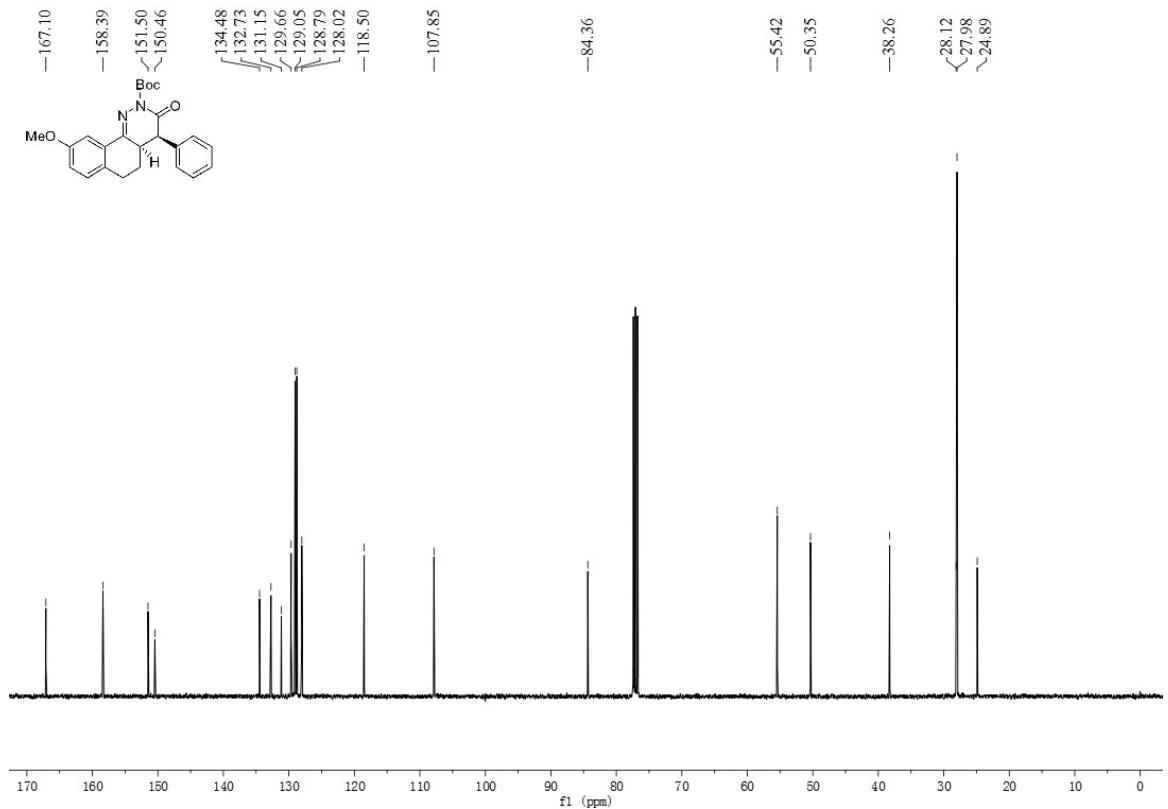

<sup>1</sup>H NMR spectrum of **3ia**

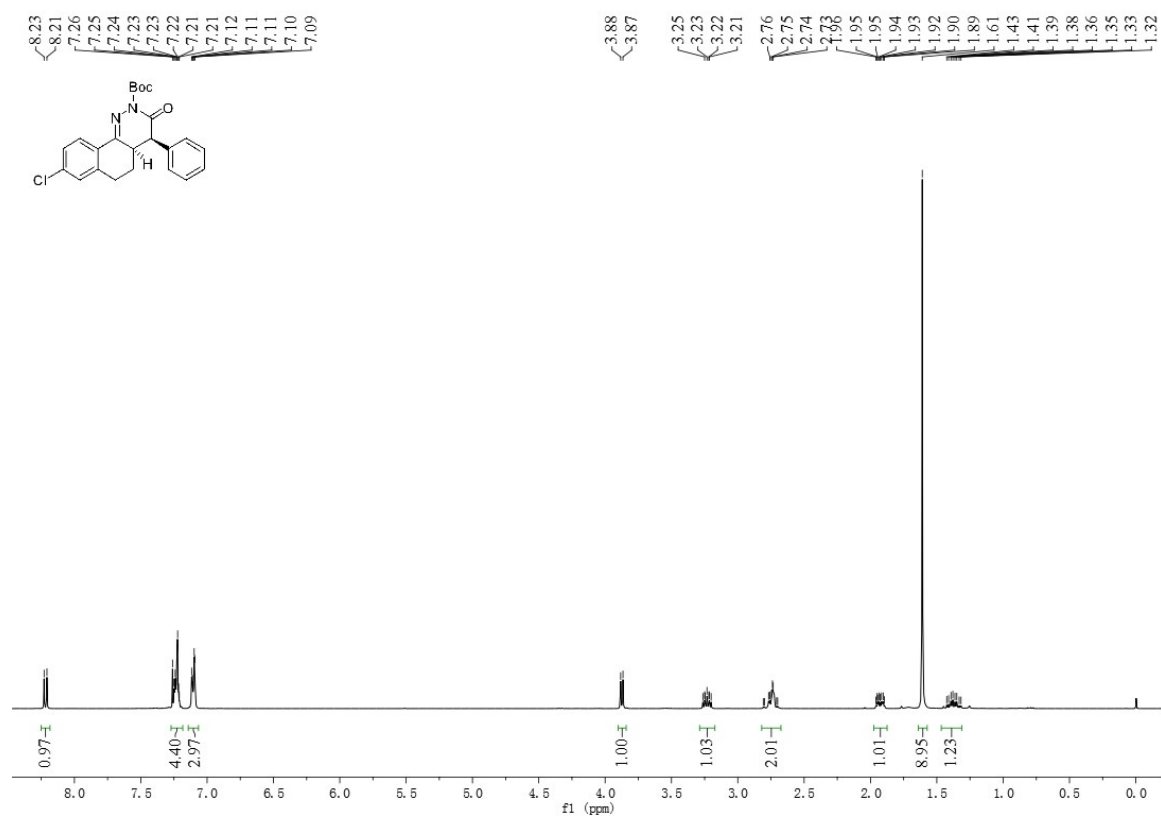

<sup>13</sup>C NMR spectrum of **3ia**

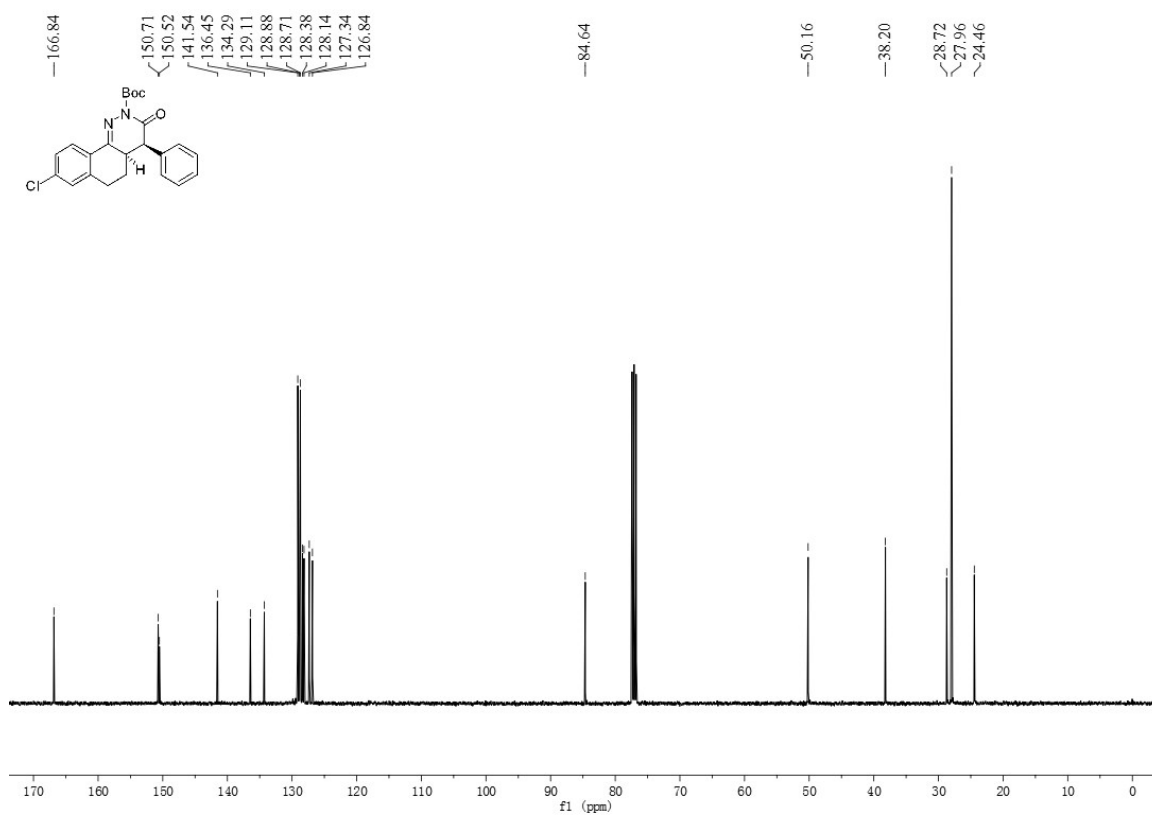

### <sup>1</sup>H NMR spectrum of **3ja**

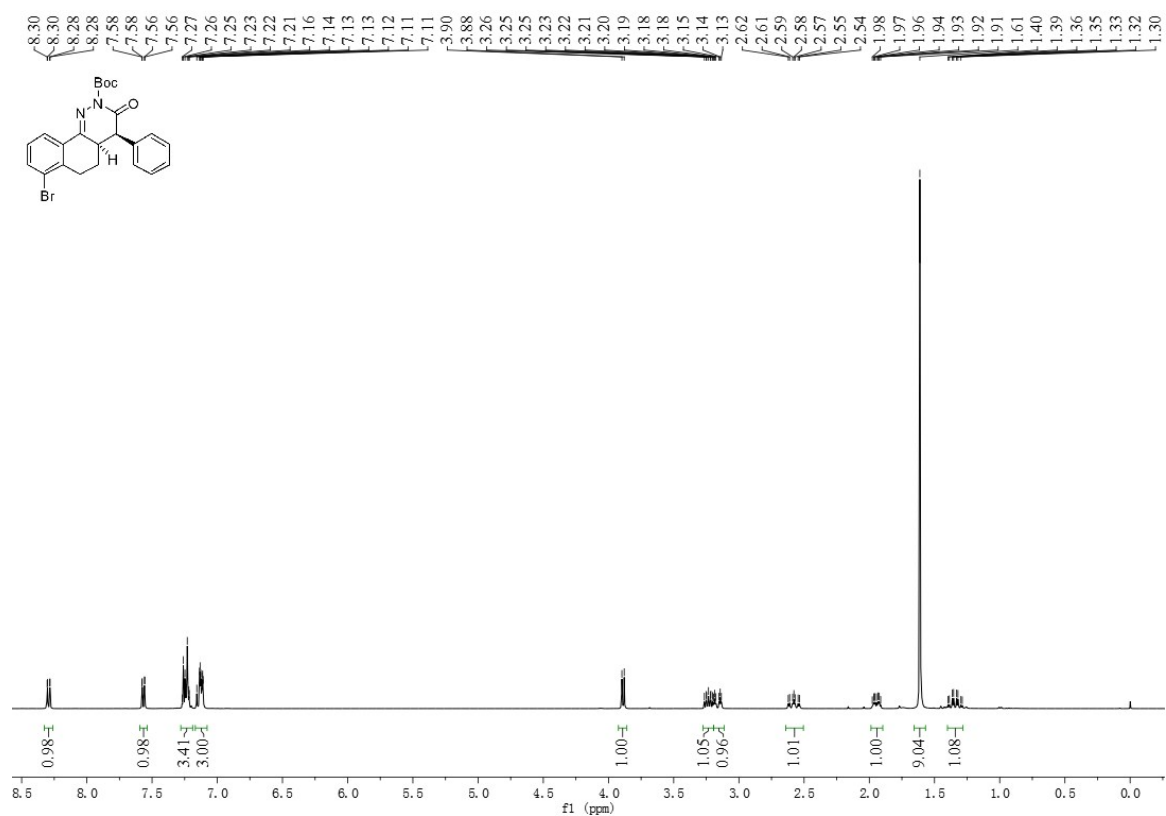

### <sup>13</sup>C NMR spectrum of **3ja**

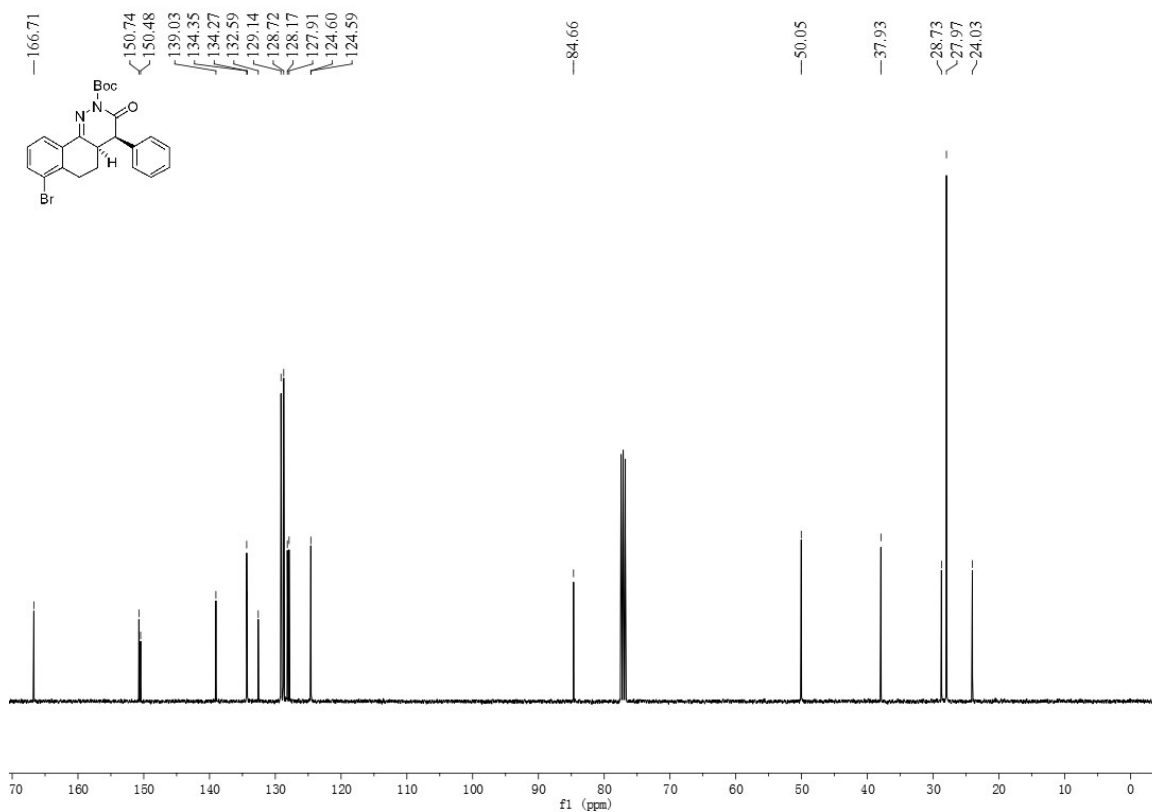



### <sup>1</sup>H NMR spectrum of **3ka**

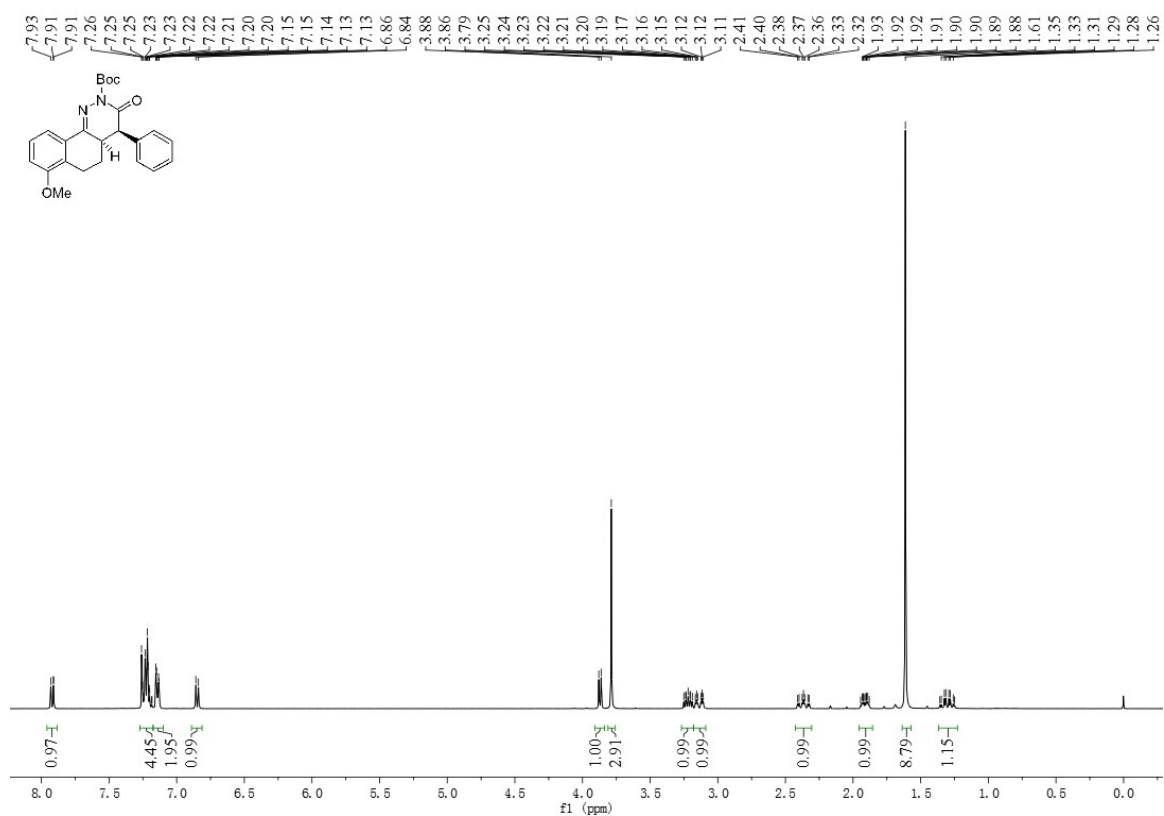

### <sup>13</sup>C NMR spectrum of **3ka**

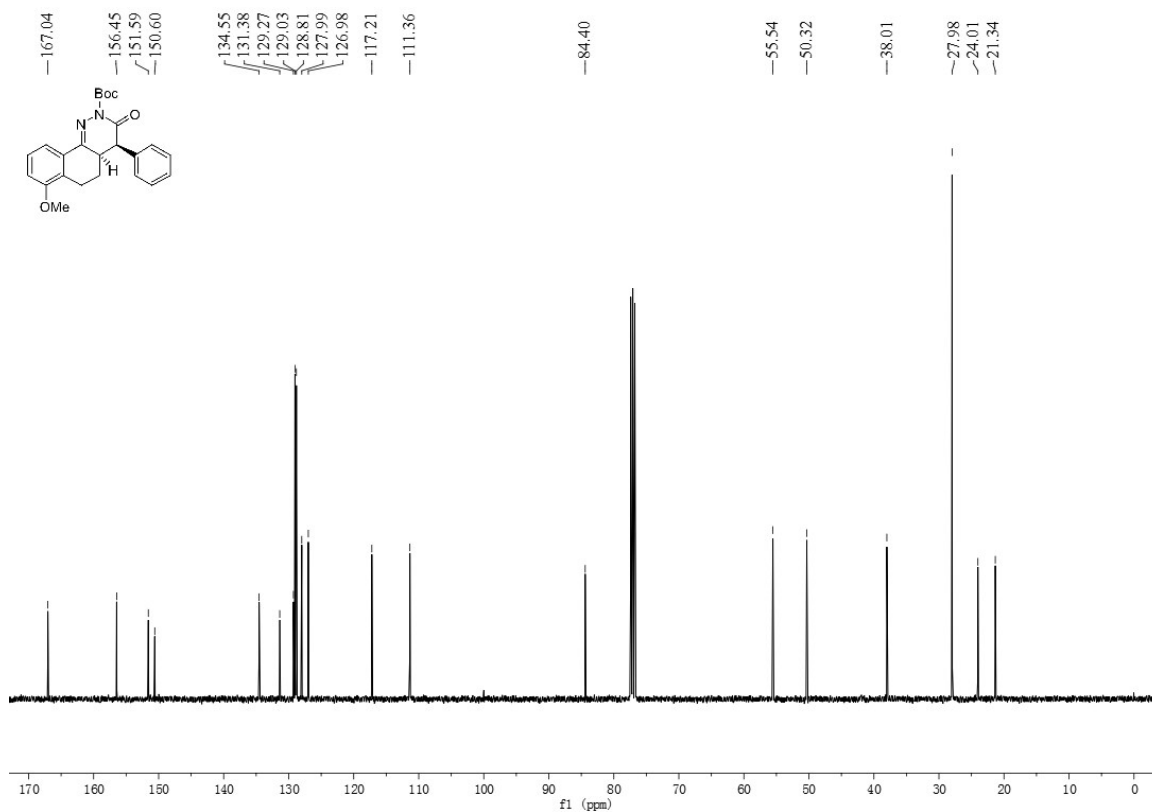

<sup>1</sup>H NMR spectrum of **9**

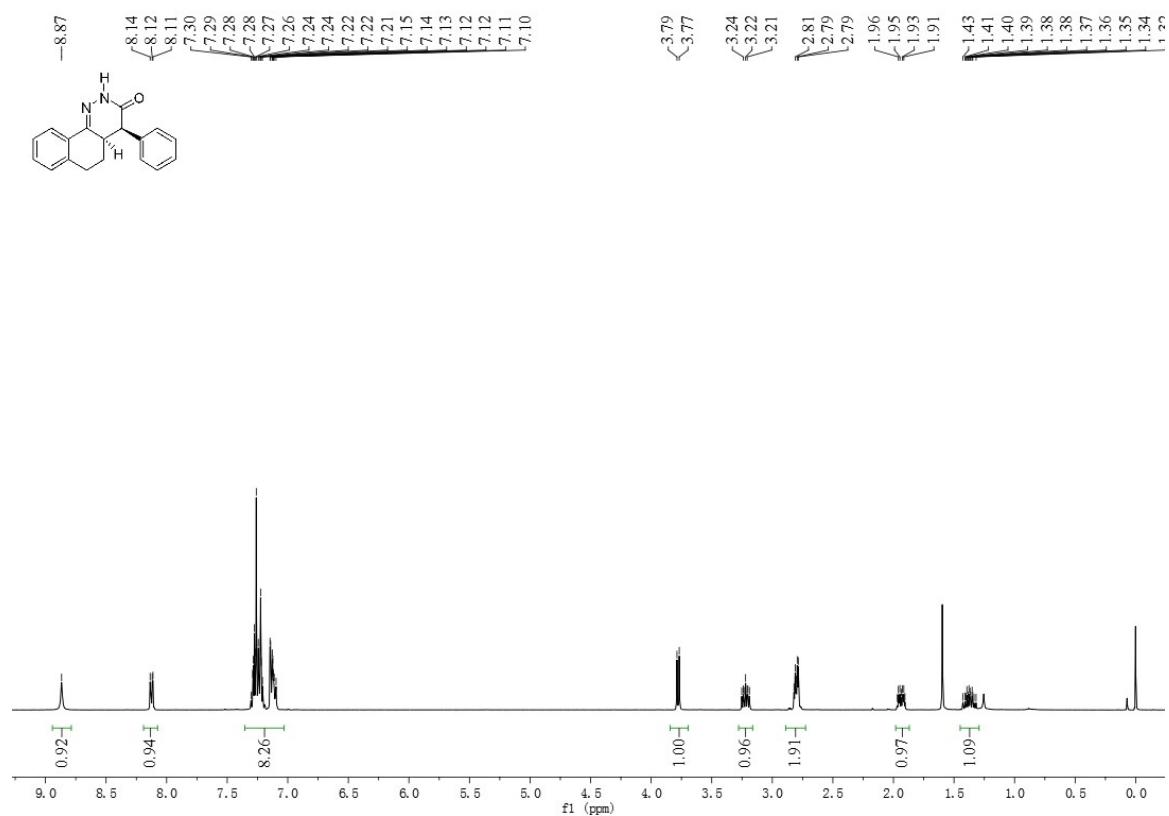

<sup>13</sup>C NMR spectrum of **9**

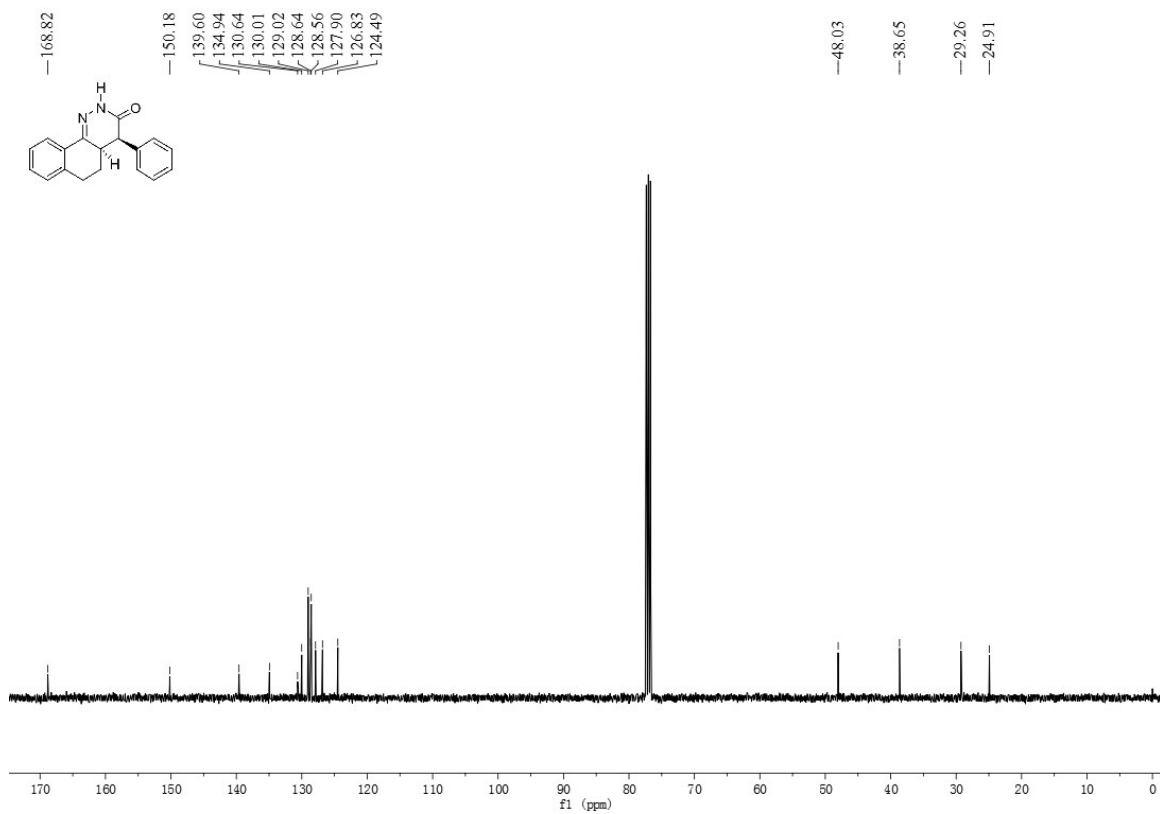

### <sup>1</sup>H NMR spectrum of **10**

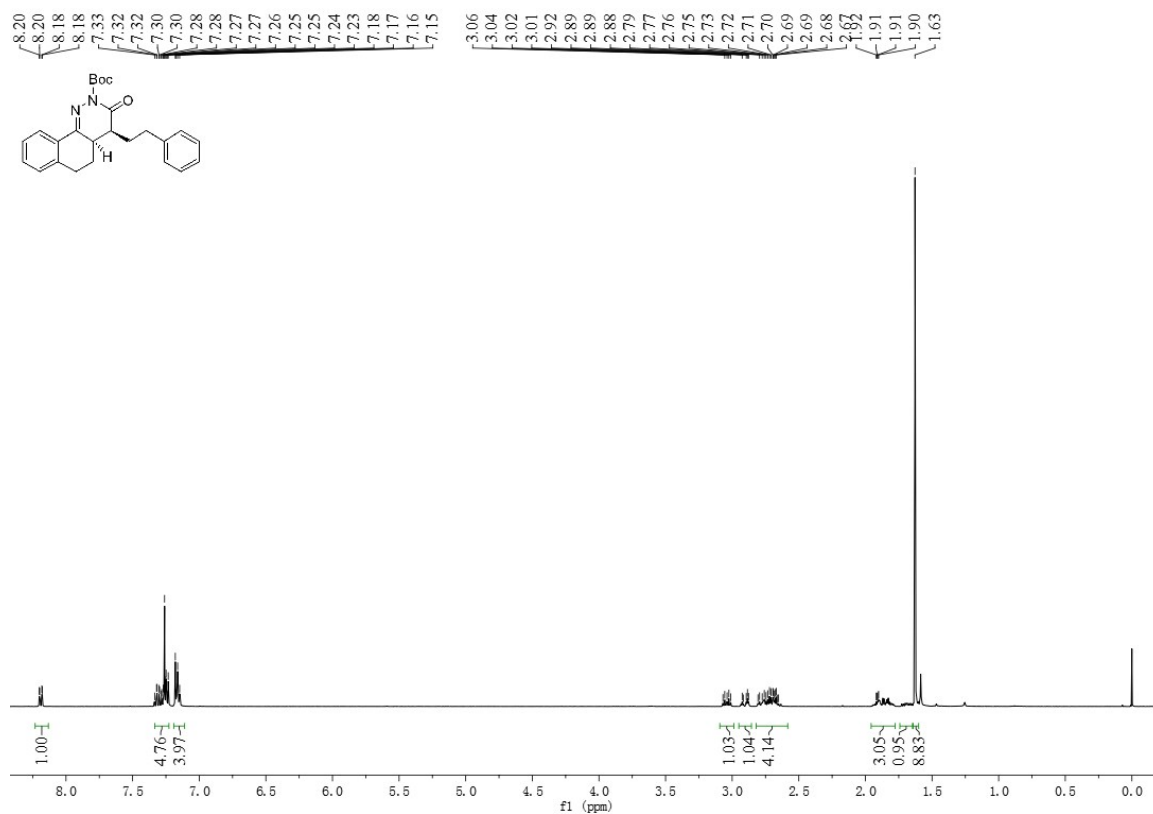

### <sup>13</sup>C NMR spectrum of **10**

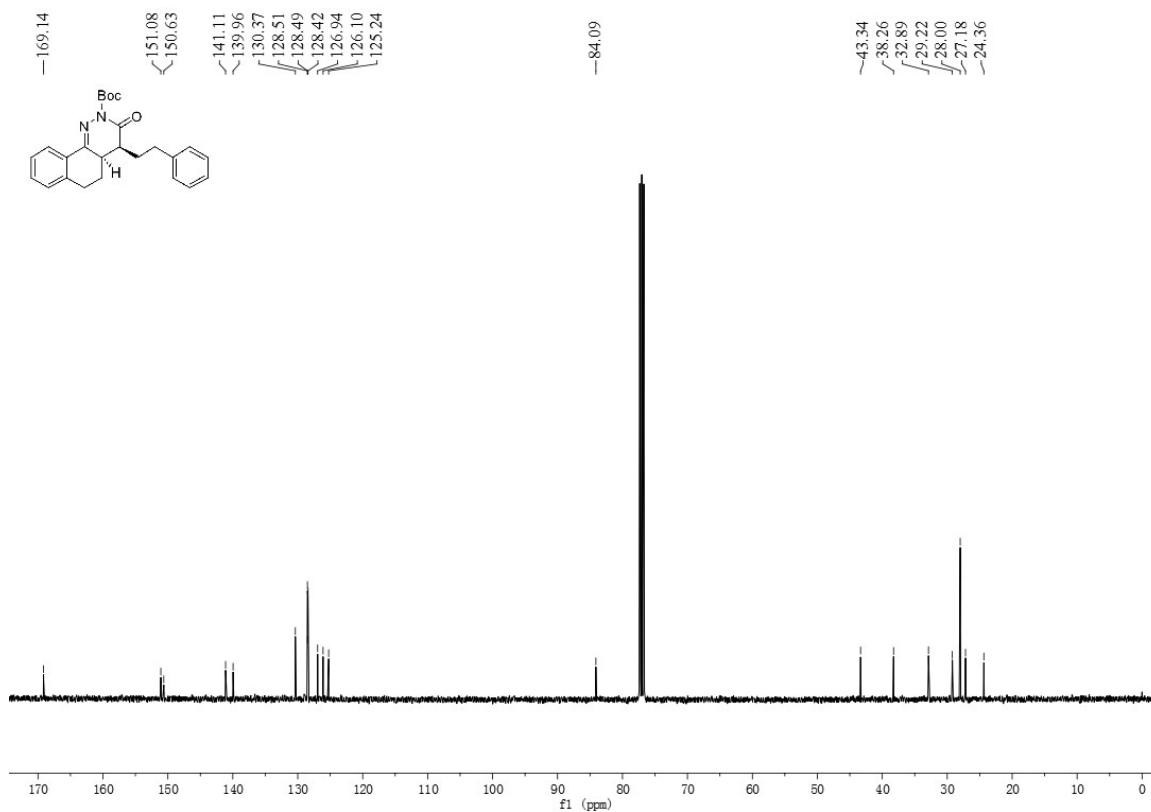

## 9. HPLC of Substrates and Products

(3aa)

| SAMPLE INFORMATION |                         |                  |                       |  |  |
|--------------------|-------------------------|------------------|-----------------------|--|--|
| Sample Name:       | ZZJ-2-184-2-AD-30%254nm | Acquired By:     | System                |  |  |
| Sample Type:       | Unknown                 | Date Acquired:   | 12/27/2017 9:23:26 AM |  |  |
| Vial:              | 1                       | Acq. Method:     | 30% 254               |  |  |
| Injection #:       | 1                       | Date Processed:  | 1/20/2018 3:40:56 PM  |  |  |
| Injection Volume:  | 20.00 ul                | Channel Name:    | 2487Channel 1         |  |  |
| Run Time:          | 120.00 Minutes          | Sample Set Name: |                       |  |  |

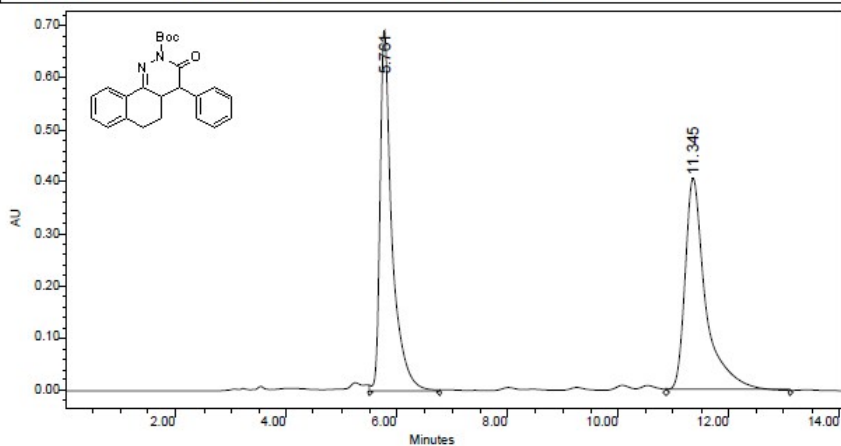

|   | RT (min) | Area (V*sec) | % Area | Height (V) | % Height |
|---|----------|--------------|--------|------------|----------|
| 1 | 5.761    | 10367463     | 49.09  | 694331     | 62.96    |
| 2 | 11.345   | 10750985     | 50.91  | 408504     | 37.04    |

| SAMPLE INFORMATION |                          |                  |                      |  |  |
|--------------------|--------------------------|------------------|----------------------|--|--|
| Sample Name:       | ZZJ-3-17-4-2-AD-30%254nm | Acquired By:     | System               |  |  |
| Sample Type:       | Unknown                  | Date Acquired:   | 1/19/2018 1:59:24 PM |  |  |
| Vial:              | 1                        | Acq. Method:     | 30% 254              |  |  |
| Injection #:       | 1                        | Date Processed:  | 1/20/2018 3:44:12 PM |  |  |
| Injection Volume:  | 20.00 ul                 | Channel Name:    | 2487Channel 1        |  |  |
| Run Time:          | 120.00 Minutes           | Sample Set Name: |                      |  |  |

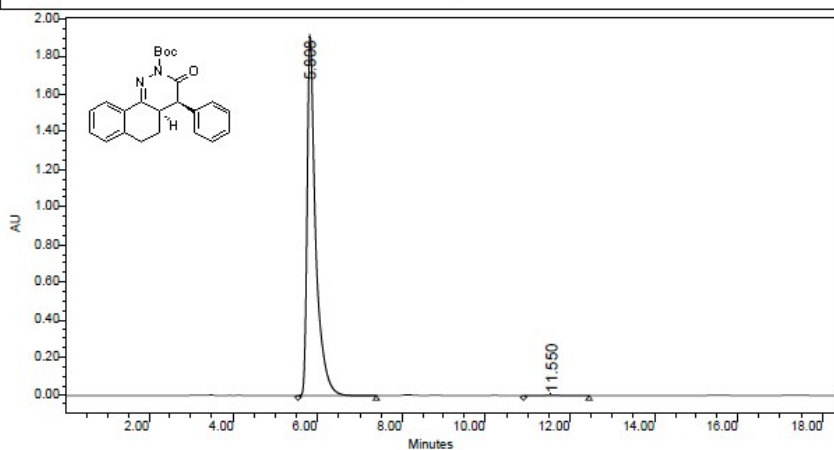

|   | RT (min) | Area (V*sec) | % Area | Height (V) | % Height |
|---|----------|--------------|--------|------------|----------|
| 1 | 5.808    | 27081476     | 99.77  | 1920561    | 99.88    |
| 2 | 11.550   | 63280        | 0.23   | 2402       | 0.12     |

(3ab)

| SAMPLE INFORMATION |                            |                  |                      |
|--------------------|----------------------------|------------------|----------------------|
| Sample Name:       | ZZJ-3-18-1-rac-AD-30%254nm | Acquired By:     | System               |
| Sample Type:       | Unknown                    | Date Acquired:   | 1/20/2018 3:15:30 PM |
| Vial:              | 1                          | Acq. Method:     | 30% 254              |
| Injection #:       | 1                          | Date Processed:  | 1/20/2018 3:45:22 PM |
| Injection Volume:  | 20.00 ul                   | Channel Name:    | 2487Channel 1        |
| Run Time:          | 120.00 Minutes             | Sample Set Name: |                      |

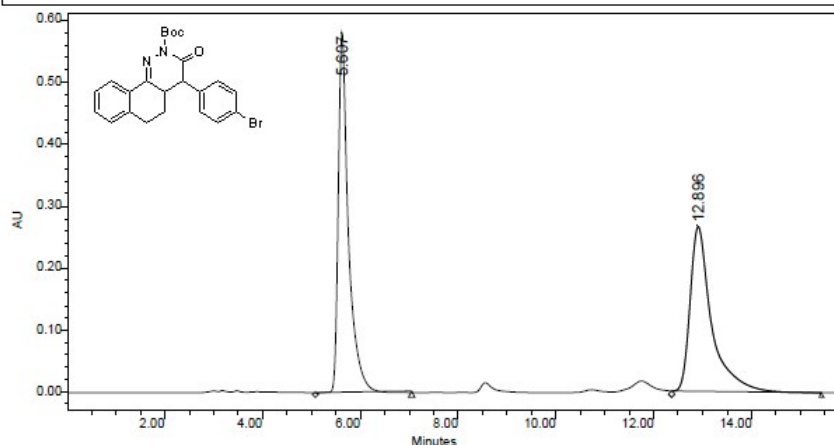

|   | RT (min) | Area (V*sec) | % Area | Height (V) | % Height |
|---|----------|--------------|--------|------------|----------|
| 1 | 5.607    | 8396664      | 50.28  | 583397     | 68.51    |
| 2 | 12.896   | 8304739      | 49.72  | 268117     | 31.49    |

| SAMPLE INFORMATION |                            |                  |                      |
|--------------------|----------------------------|------------------|----------------------|
| Sample Name:       | ZZJ-3-18-1-asy-AD-30%254nm | Acquired By:     | System               |
| Sample Type:       | Unknown                    | Date Acquired:   | 1/20/2018 7:13:57 PM |
| Vial:              | 1                          | Acq. Method:     | 30% 254              |
| Injection #:       | 1                          | Date Processed:  | 1/20/2018 7:33:03 PM |
| Injection Volume:  | 20.00 ul                   | Channel Name:    | 2487Channel 1        |
| Run Time:          | 120.00 Minutes             | Sample Set Name: |                      |

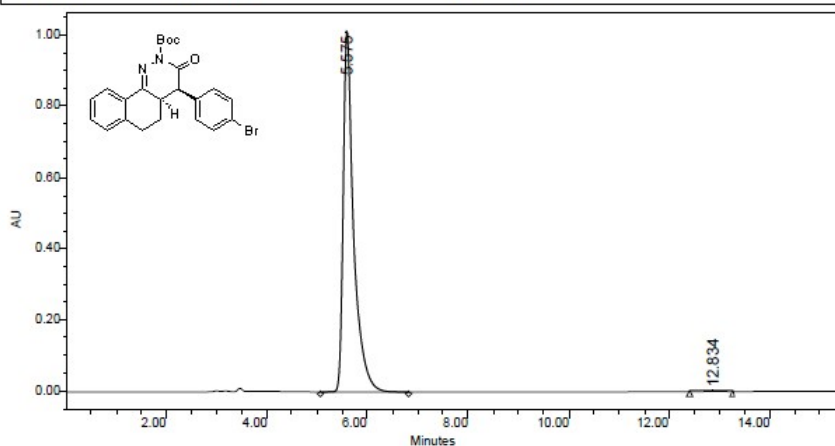

|   | RT (min) | Area (V*sec) | % Area | Height (V) | % Height |
|---|----------|--------------|--------|------------|----------|
| 1 | 5.575    | 14574149     | 99.87  | 1016634    | 99.92    |
| 2 | 12.834   | 18490        | 0.13   | 796        | 0.08     |

(3ac)

| SAMPLE INFORMATION |                            |                  |                     |  |
|--------------------|----------------------------|------------------|---------------------|--|
| Sample Name:       | ZZJ-3-28-2-RAC-AD-30%254nm | Acquired By:     | System              |  |
| Sample Type:       | Unknown                    | Date Acquired:   | 2/1/2018 1:37:31 PM |  |
| Vial:              | 1                          | Acq. Method:     | 30% 254             |  |
| Injection #:       | 1                          | Date Processed:  | 2/1/2018 1:51:19 PM |  |
| Injection Volume:  | 20.00 ul                   | Channel Name:    | 2487Channel 1       |  |
| Run Time:          | 120.00 Minutes             | Sample Set Name: |                     |  |

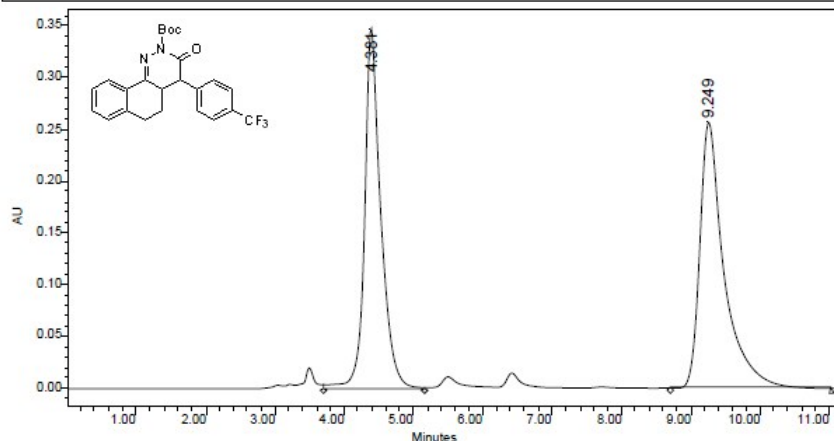

|   | RT (min) | Area (V*sec) | % Area | Height (V) | % Height |
|---|----------|--------------|--------|------------|----------|
| 1 | 4.361    | 5664787      | 47.44  | 348427     | 57.53    |
| 2 | 9.249    | 6275327      | 52.56  | 257234     | 42.47    |

| SAMPLE INFORMATION |                            |                  |                     |  |
|--------------------|----------------------------|------------------|---------------------|--|
| Sample Name:       | ZZJ-3-28-1-asy-AD-30%254nm | Acquired By:     | System              |  |
| Sample Type:       | Unknown                    | Date Acquired:   | 2/1/2018 5:29:47 PM |  |
| Vial:              | 1                          | Acq. Method:     | 30% 254             |  |
| Injection #:       | 1                          | Date Processed:  | 2/1/2018 5:49:45 PM |  |
| Injection Volume:  | 20.00 ul                   | Channel Name:    | 2487Channel 1       |  |
| Run Time:          | 120.00 Minutes             | Sample Set Name: |                     |  |

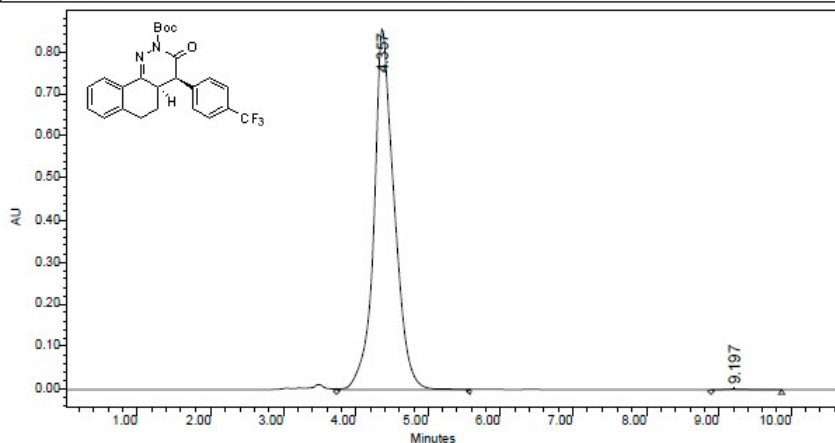

|   | RT (min) | Area (V*sec) | % Area | Height (V) | % Height |
|---|----------|--------------|--------|------------|----------|
| 1 | 4.357    | 16650901     | 99.85  | 856875     | 99.85    |
| 2 | 9.197    | 25631        | 0.15   | 1323       | 0.15     |

(3ad)

| SAMPLE INFORMATION |                            |                  |                      |
|--------------------|----------------------------|------------------|----------------------|
| Sample Name:       | ZZJ-3-18-3-rac-AD-30%254nm | Acquired By:     | System               |
| Sample Type:       | Unknown                    | Date Acquired:   | 1/20/2018 3:35:03 PM |
| Vial:              | 1                          | Acq. Method:     | 30% 254              |
| Injection #:       | 1                          | Date Processed:  | 1/20/2018 3:50:05 PM |
| Injection Volume:  | 20.00 ul                   | Channel Name:    | 2487Channel 1        |
| Run Time:          | 120.00 Minutes             | Sample Set Name: |                      |

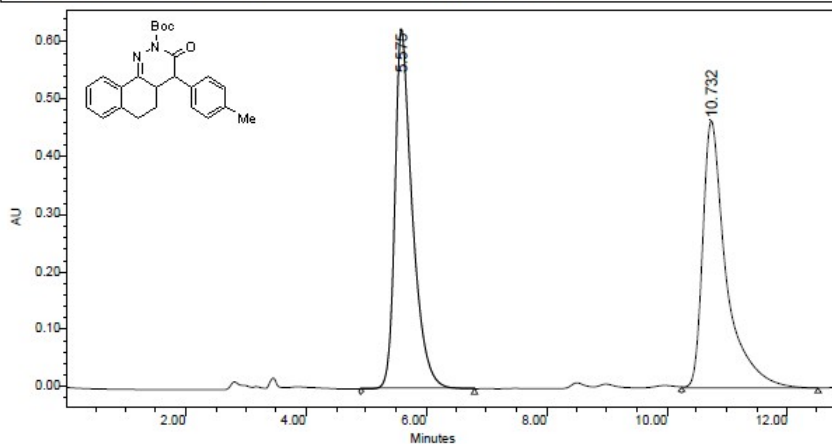

|   | RT (min) | Area (V*sec) | % Area | Height (V) | % Height |
|---|----------|--------------|--------|------------|----------|
| 1 | 5.575    | 12618797     | 49.95  | 626629     | 57.41    |
| 2 | 10.732   | 12645011     | 50.05  | 464774     | 42.59    |

| SAMPLE INFORMATION |                            |                  |                      |
|--------------------|----------------------------|------------------|----------------------|
| Sample Name:       | ZZJ-3-18-3-asy-AD-30%254nm | Acquired By:     | System               |
| Sample Type:       | Unknown                    | Date Acquired:   | 1/20/2018 7:32:11 PM |
| Vial:              | 1                          | Acq. Method:     | 30% 254              |
| Injection #:       | 1                          | Date Processed:  | 1/20/2018 7:56:28 PM |
| Injection Volume:  | 20.00 ul                   | Channel Name:    | 2487Channel 1        |
| Run Time:          | 120.00 Minutes             | Sample Set Name: |                      |

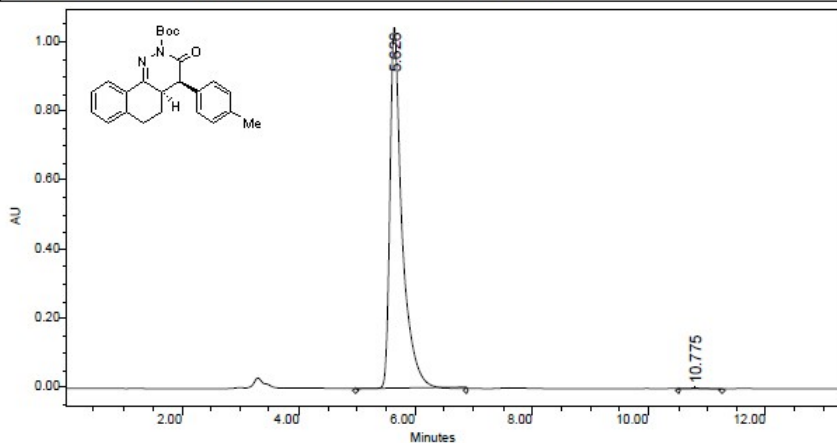

|   | RT (min) | Area (V*sec) | % Area | Height (V) | % Height |
|---|----------|--------------|--------|------------|----------|
| 1 | 5.626    | 15188205     | 99.70  | 1048353    | 99.82    |
| 2 | 10.775   | 44977        | 0.30   | 1842       | 0.18     |

(3ae)

| SAMPLE INFORMATION |                            |                  |                      |
|--------------------|----------------------------|------------------|----------------------|
| Sample Name:       | ZZJ-3-18-4-rac-AD-30%254nm | Acquired By:     | System               |
| Sample Type:       | Unknown                    | Date Acquired:   | 1/20/2018 3:51:26 PM |
| Vial:              | 1                          | Acq. Method:     | 30% 254              |
| Injection #:       | 1                          | Date Processed:  | 1/20/2018 4:10:43 PM |
| Injection Volume:  | 20.00 ul                   | Channel Name:    | 2487Channel 1        |
| Run Time:          | 120.00 Minutes             | Sample Set Name: |                      |

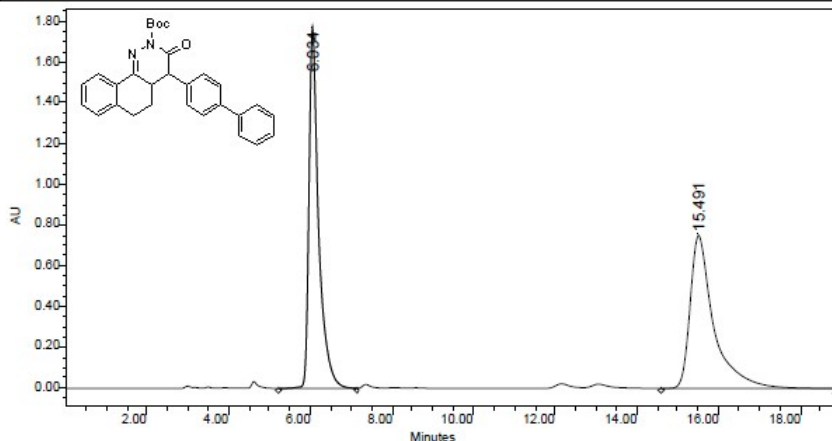

|   | RT (min) | Area (V*sec) | % Area | Height (V) | % Height |
|---|----------|--------------|--------|------------|----------|
| 1 | 6.034    | 29275265     | 49.22  | 1770696    | 70.15    |
| 2 | 15.491   | 30203941     | 50.78  | 753505     | 29.85    |

| SAMPLE INFORMATION |                            |                  |                      |
|--------------------|----------------------------|------------------|----------------------|
| Sample Name:       | ZZJ-3-18-4-asy-AD-30%254nm | Acquired By:     | System               |
| Sample Type:       | Unknown                    | Date Acquired:   | 1/20/2018 7:48:18 PM |
| Vial:              | 1                          | Acq. Method:     | 30% 254              |
| Injection #:       | 2                          | Date Processed:  | 1/20/2018 8:06:29 PM |
| Injection Volume:  | 20.00 ul                   | Channel Name:    | 2487Channel 1        |
| Run Time:          | 120.00 Minutes             | Sample Set Name: |                      |

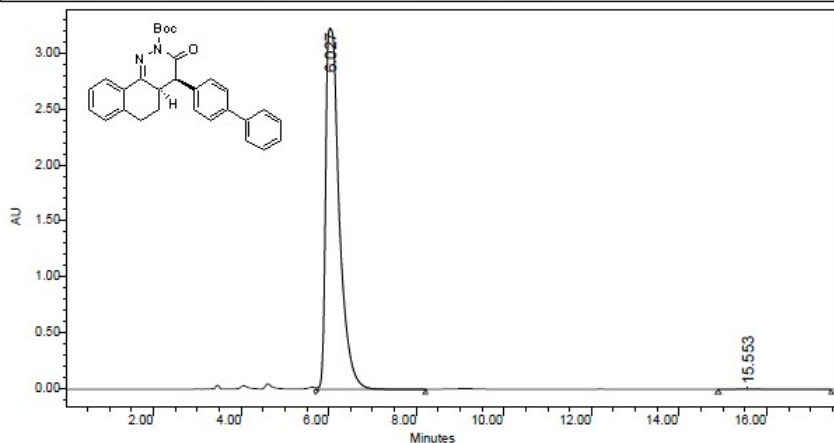

|   | RT (min) | Area (V*sec) | % Area | Height (V) | % Height |
|---|----------|--------------|--------|------------|----------|
| 1 | 6.027    | 69888050     | 99.74  | 3229154    | 99.86    |
| 2 | 15.553   | 183377       | 0.26   | 4648       | 0.14     |



(3af)

| SAMPLE INFORMATION |                            |                  |                      |
|--------------------|----------------------------|------------------|----------------------|
| Sample Name:       | ZZJ-3-19-1-rac-AD-30%254nm | Acquired By:     | System               |
| Sample Type:       | Unknown                    | Date Acquired:   | 1/23/2018 2:06:35 PM |
| Vial:              | 1                          | Acq. Method:     | 30% 254              |
| Injection #:       | 1                          | Date Processed:  | 1/23/2018 2:32:33 PM |
| Injection Volume:  | 20.00 ul                   | Channel Name:    | 2487Channel 1        |
| Run Time:          | 120.00 Minutes             | Sample Set Name: |                      |

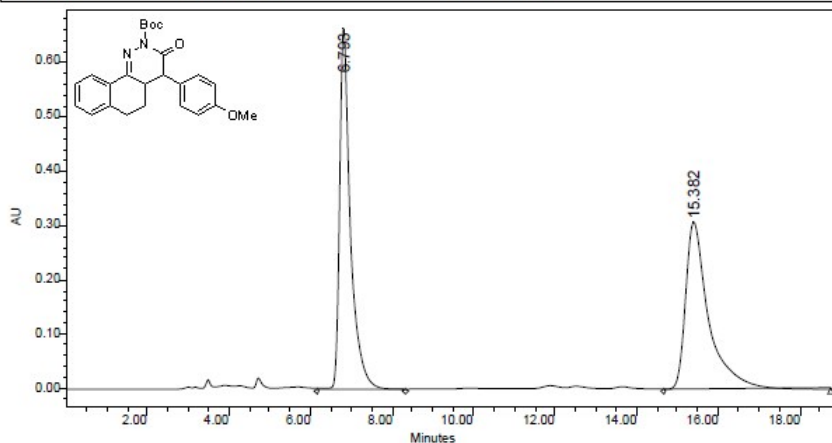

|   | RT (min) | Area (V*sec) | % Area | Height (V) | % Height |
|---|----------|--------------|--------|------------|----------|
| 1 | 6.793    | 12223793     | 50.22  | 663787     | 68.37    |
| 2 | 15.382   | 12117069     | 49.78  | 307140     | 31.63    |

| SAMPLE INFORMATION |                            |                  |                      |
|--------------------|----------------------------|------------------|----------------------|
| Sample Name:       | ZZJ-3-19-1-asy-AD-30%254nm | Acquired By:     | System               |
| Sample Type:       | Unknown                    | Date Acquired:   | 1/23/2018 6:03:58 PM |
| Vial:              | 1                          | Acq. Method:     | 30% 254              |
| Injection #:       | 1                          | Date Processed:  | 1/23/2018 6:26:39 PM |
| Injection Volume:  | 20.00 ul                   | Channel Name:    | 2487Channel 1        |
| Run Time:          | 120.00 Minutes             | Sample Set Name: |                      |

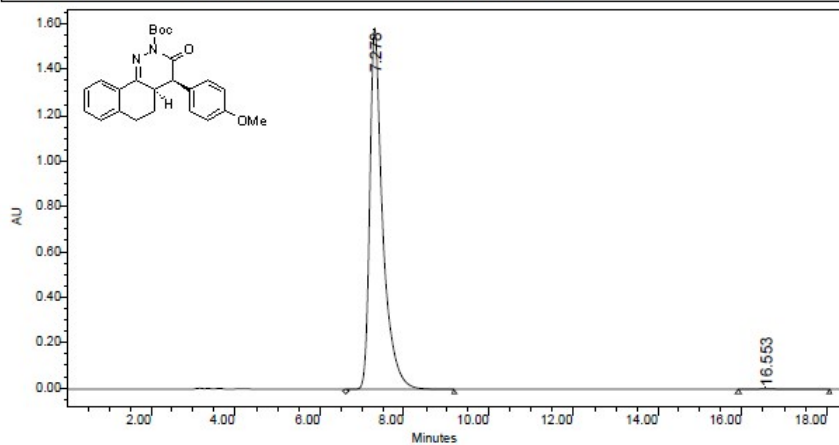

|   | RT (min) | Area (V*sec) | % Area | Height (V) | % Height |
|---|----------|--------------|--------|------------|----------|
| 1 | 7.278    | 33732964     | 99.80  | 1584438    | 99.91    |
| 2 | 16.553   | 67358        | 0.20   | 1386       | 0.09     |

(3ag)

| SAMPLE INFORMATION |                            |                  |                      |
|--------------------|----------------------------|------------------|----------------------|
| Sample Name:       | ZZJ-3-19-2-rac-AD-30%254nm | Acquired By:     | System               |
| Sample Type:       | Unknown                    | Date Acquired:   | 1/23/2018 2:31:36 PM |
| Vial:              | 1                          | Acq. Method:     | 30% 254              |
| Injection #:       | 2                          | Date Processed:  | 1/23/2018 2:50:24 PM |
| Injection Volume:  | 20.00 ul                   | Channel Name:    | 2487Channel 1        |
| Run Time:          | 120.00 Minutes             | Sample Set Name: |                      |

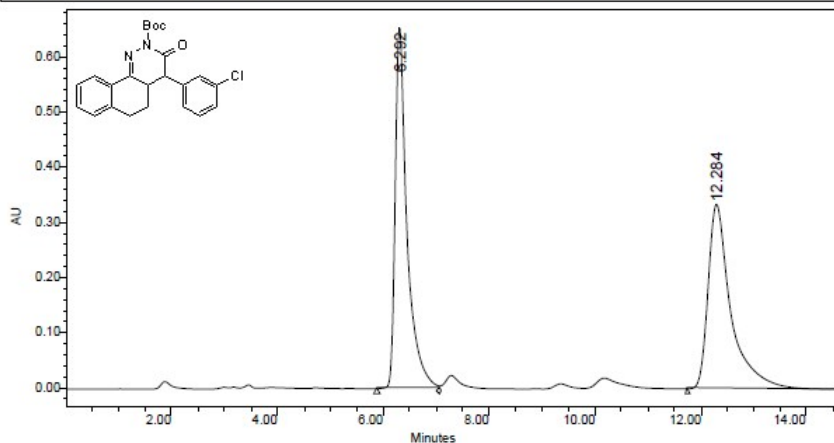

|   | RT (min) | Area (V*sec) | % Area | Height (V) | % Height |
|---|----------|--------------|--------|------------|----------|
| 1 | 6.292    | 10164539     | 50.34  | 656450     | 66.24    |
| 2 | 12.284   | 10027277     | 49.66  | 334498     | 33.76    |

| SAMPLE INFORMATION |                            |                  |                      |
|--------------------|----------------------------|------------------|----------------------|
| Sample Name:       | ZZJ-3-19-2-asy-AD-30%254nm | Acquired By:     | System               |
| Sample Type:       | Unknown                    | Date Acquired:   | 1/23/2018 6:25:29 PM |
| Vial:              | 1                          | Acq. Method:     | 30% 254              |
| Injection #:       | 1                          | Date Processed:  | 1/23/2018 6:41:14 PM |
| Injection Volume:  | 20.00 ul                   | Channel Name:    | 2487Channel 1        |
| Run Time:          | 120.00 Minutes             | Sample Set Name: |                      |

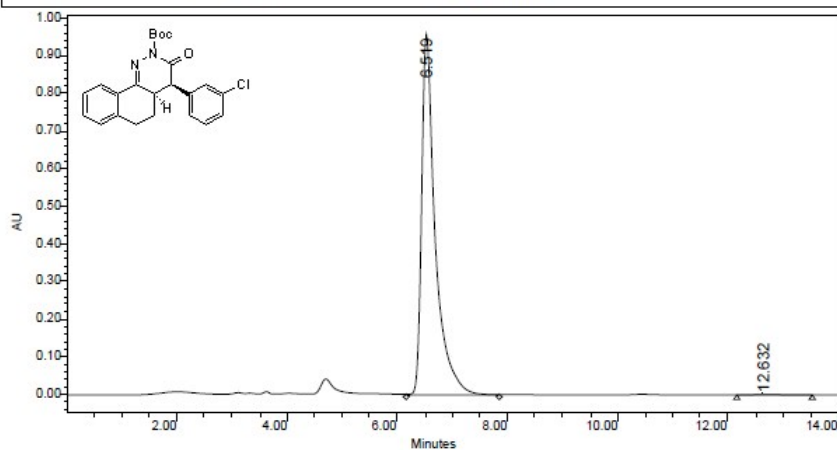

|   | RT (min) | Area (V*sec) | % Area | Height (V) | % Height |
|---|----------|--------------|--------|------------|----------|
| 1 | 6.519    | 16443817     | 99.82  | 958718     | 99.90    |
| 2 | 12.632   | 28835        | 0.18   | 946        | 0.10     |

(3ah)

| SAMPLE INFORMATION |                            |                  |                      |
|--------------------|----------------------------|------------------|----------------------|
| Sample Name:       | ZZJ-3-19-3-rac-AD-30%254nm | Acquired By:     | System               |
| Sample Type:       | Unknown                    | Date Acquired:   | 1/23/2018 2:49:19 PM |
| Vial:              | 1                          | Acq. Method:     | 30% 254              |
| Injection #:       | 1                          | Date Processed:  | 1/23/2018 3:09:40 PM |
| Injection Volume:  | 20.00 ul                   | Channel Name:    | 2487Channel 1        |
| Run Time:          | 120.00 Minutes             | Sample Set Name: |                      |

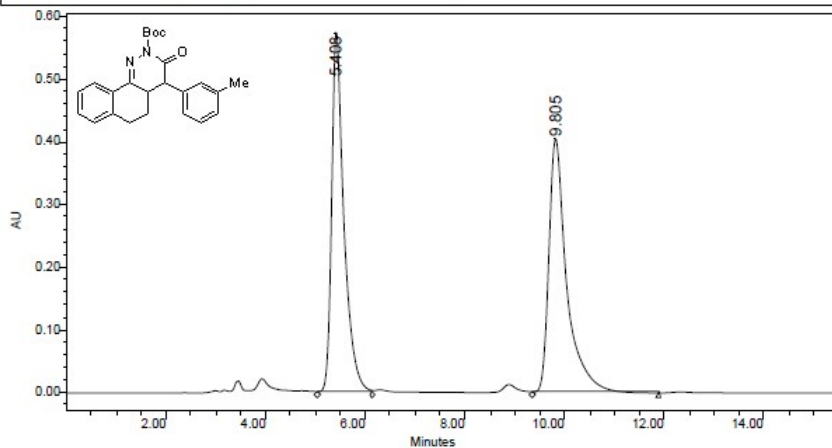

|   | RT (min) | Area (V*sec) | % Area | Height (V) | % Height |
|---|----------|--------------|--------|------------|----------|
| 1 | 5.408    | 9821192      | 49.32  | 576292     | 58.69    |
| 2 | 9.805    | 10093504     | 50.68  | 405613     | 41.31    |

| SAMPLE INFORMATION |                            |                  |                      |
|--------------------|----------------------------|------------------|----------------------|
| Sample Name:       | ZZJ-3-19-3-asy-AD-30%254nm | Acquired By:     | System               |
| Sample Type:       | Unknown                    | Date Acquired:   | 1/23/2018 6:48:11 PM |
| Vial:              | 1                          | Acq. Method:     | 30% 254              |
| Injection #:       | 1                          | Date Processed:  | 1/23/2018 7:03:41 PM |
| Injection Volume:  | 20.00 ul                   | Channel Name:    | 2487Channel 1        |
| Run Time:          | 120.00 Minutes             | Sample Set Name: |                      |

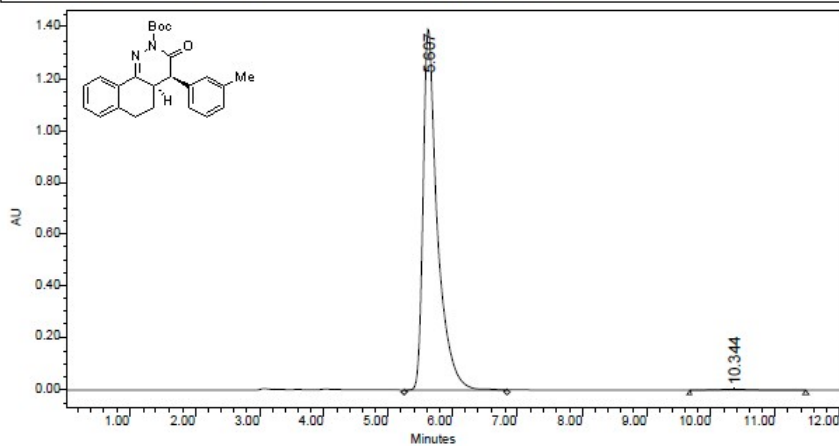

|   | RT (min) | Area (V*sec) | % Area | Height (V) | % Height |
|---|----------|--------------|--------|------------|----------|
| 1 | 5.607    | 21536583     | 99.48  | 1399254    | 99.76    |
| 2 | 10.344   | 112507       | 0.52   | 3395       | 0.24     |

(3ai)

| SAMPLE INFORMATION |                            |                  |                      |
|--------------------|----------------------------|------------------|----------------------|
| Sample Name:       | ZZJ-3-19-4-rac-AD-30%254nm | Acquired By:     | System               |
| Sample Type:       | Unknown                    | Date Acquired:   | 1/23/2018 3:08:26 PM |
| Vial:              | 1                          | Acq. Method:     | 30% 254              |
| Injection #:       | 1                          | Date Processed:  | 1/23/2018 3:28:48 PM |
| Injection Volume:  | 20.00 ul                   | Channel Name:    | 2487Channel 1        |
| Run Time:          | 120.00 Minutes             | Sample Set Name: |                      |

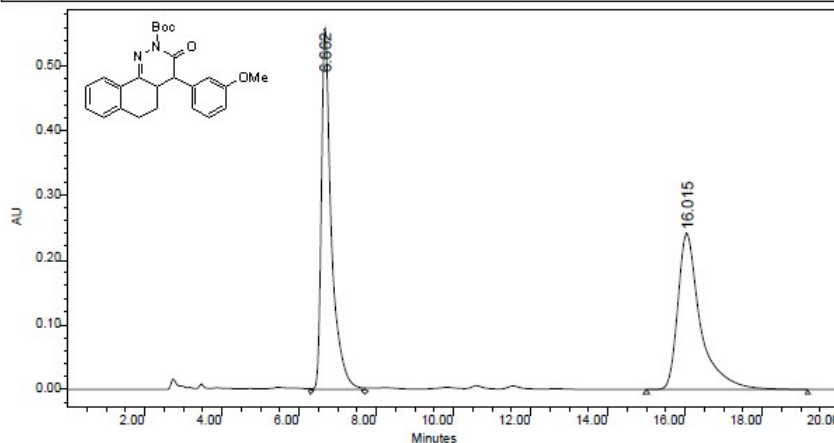

|   | RT (min) | Area (V*sec) | % Area | Height (V) | % Height |
|---|----------|--------------|--------|------------|----------|
| 1 | 6.662    | 10065323     | 50.66  | 560249     | 69.88    |
| 2 | 16.015   | 9803858      | 49.34  | 241470     | 30.12    |

| SAMPLE INFORMATION |                            |                  |                      |
|--------------------|----------------------------|------------------|----------------------|
| Sample Name:       | ZZJ-3-19-4-asy-AD-30%254nm | Acquired By:     | System               |
| Sample Type:       | Unknown                    | Date Acquired:   | 1/23/2018 7:08:13 PM |
| Vial:              | 1                          | Acq. Method:     | 30% 254              |
| Injection #:       | 1                          | Date Processed:  | 1/23/2018 7:44:28 PM |
| Injection Volume:  | 20.00 ul                   | Channel Name:    | 2487Channel 1        |
| Run Time:          | 120.00 Minutes             | Sample Set Name: |                      |

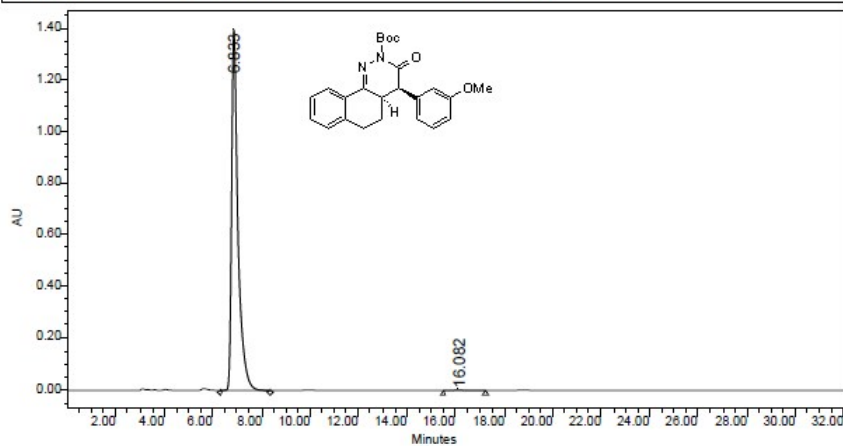

|   | RT (min) | Area (V*sec) | % Area | Height (V) | % Height |
|---|----------|--------------|--------|------------|----------|
| 1 | 6.833    | 25470125     | 99.85  | 1396485    | 99.92    |
| 2 | 16.082   | 38247        | 0.15   | 1099       | 0.08     |

(3aj)

| SAMPLE INFORMATION |                               |                  |                      |
|--------------------|-------------------------------|------------------|----------------------|
| Sample Name:       | ZZJ-3-22-1-rac-re-OD-20%254nm | Acquired By:     | System               |
| Sample Type:       | Unknown                       | Date Acquired:   | 1/27/2018 9:01:35 PM |
| Vial:              | 1                             | Acq. Method:     | 20% 254              |
| Injection #:       | 1                             | Date Processed:  | 1/27/2018 9:17:27 PM |
| Injection Volume:  | 20.00 ul                      | Channel Name:    | 2487Channel 1        |
| Run Time:          | 120.00 Minutes                | Sample Set Name: |                      |

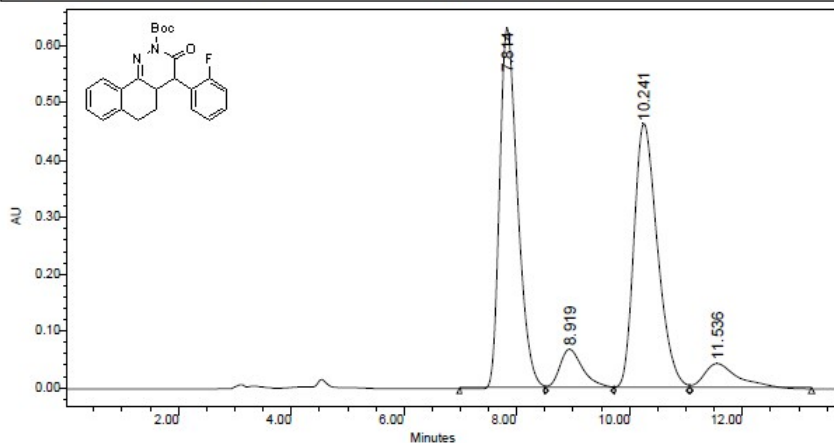

| RT (min) | Area (V*sec) | % Area | Height (V) | % Height |
|----------|--------------|--------|------------|----------|
| 1        | 14114546     | 44.49  | 632498     | 52.18    |
| 2        | 2048816      | 6.46   | 69482      | 5.73     |
| 3        | 13610043     | 42.90  | 465704     | 38.42    |
| 4        | 1953621      | 6.16   | 44502      | 3.67     |

| SAMPLE INFORMATION |                            |                  |                      |
|--------------------|----------------------------|------------------|----------------------|
| Sample Name:       | ZZJ-3-22-1-asy-OD-20%254nm | Acquired By:     | System               |
| Sample Type:       | Unknown                    | Date Acquired:   | 1/27/2018 9:29:35 PM |
| Vial:              | 1                          | Acq. Method:     | 20% 254              |
| Injection #:       | 1                          | Date Processed:  | 1/27/2018 9:43:32 PM |
| Injection Volume:  | 20.00 ul                   | Channel Name:    | 2487Channel 1        |
| Run Time:          | 120.00 Minutes             | Sample Set Name: |                      |

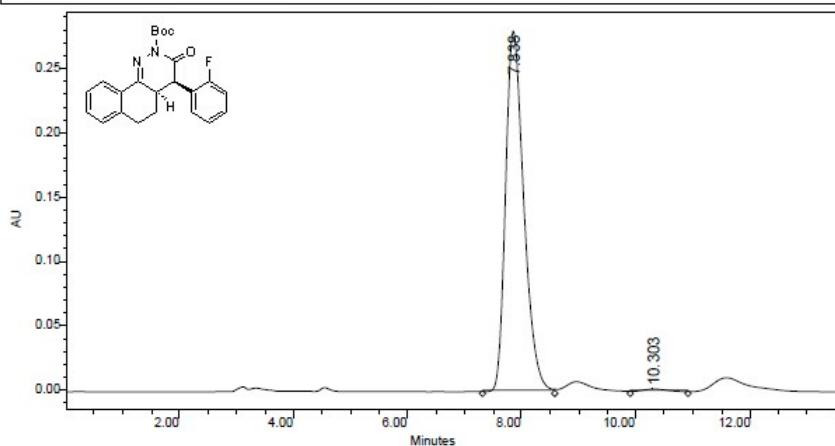

| RT (min) | Area (V*sec) | % Area | Height (V) | % Height |
|----------|--------------|--------|------------|----------|
| 1        | 6228127      | 99.00  | 279908     | 99.24    |
| 2        | 62762        | 1.00   | 2131       | 0.76     |

(3ak)

| SAMPLE INFORMATION |                            |                  |                      |
|--------------------|----------------------------|------------------|----------------------|
| Sample Name:       | ZZJ-3-22-2-rac-AD-30%254nm | Acquired By:     | System               |
| Sample Type:       | Unknown                    | Date Acquired:   | 1/25/2018 2:31:34 PM |
| Vial:              | 1                          | Acq. Method:     | 30% 254              |
| Injection #:       | 1                          | Date Processed:  | 1/25/2018 2:46:21 PM |
| Injection Volume:  | 20.00 ul                   | Channel Name:    | 2487Channel 1        |
| Run Time:          | 120.00 Minutes             | Sample Set Name: |                      |

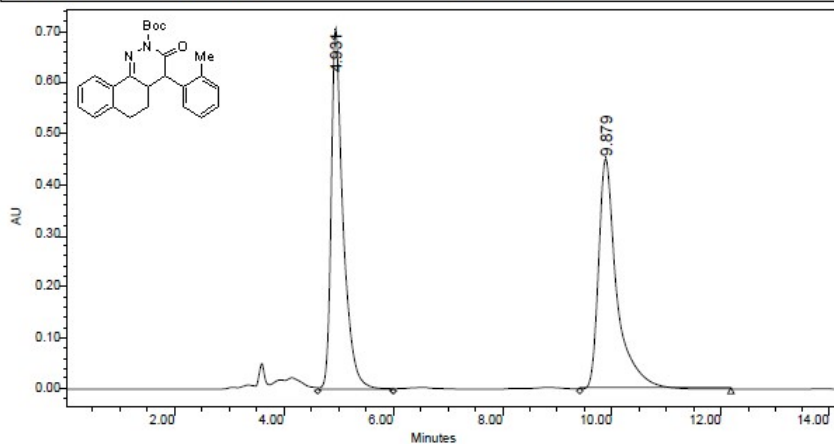

|   | RT (min) | Area (V*sec) | % Area | Height (V) | % Height |
|---|----------|--------------|--------|------------|----------|
| 1 | 4.931    | 10709804     | 50.32  | 707508     | 61.01    |
| 2 | 9.879    | 10574115     | 49.68  | 452151     | 38.99    |

| SAMPLE INFORMATION |                            |                  |                      |
|--------------------|----------------------------|------------------|----------------------|
| Sample Name:       | ZZJ-3-22-2-asy-AD-30%254nm | Acquired By:     | System               |
| Sample Type:       | Unknown                    | Date Acquired:   | 1/25/2018 4:02:47 PM |
| Vial:              | 1                          | Acq. Method:     | 30% 254              |
| Injection #:       | 1                          | Date Processed:  | 1/25/2018 4:16:38 PM |
| Injection Volume:  | 20.00 ul                   | Channel Name:    | 2487Channel 1        |
| Run Time:          | 120.00 Minutes             | Sample Set Name: |                      |

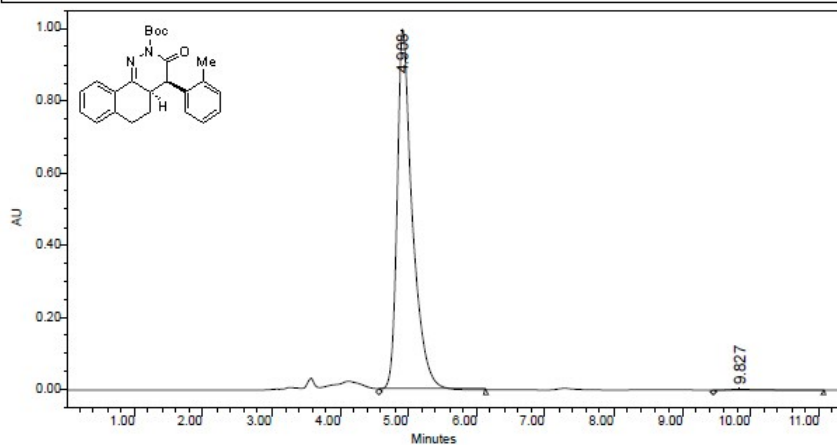

|   | RT (min) | Area (V*sec) | % Area | Height (V) | % Height |
|---|----------|--------------|--------|------------|----------|
| 1 | 4.908    | 15566469     | 99.60  | 1003759    | 99.77    |
| 2 | 9.827    | 62565        | 0.40   | 2287       | 0.23     |

(3al)

| SAMPLE INFORMATION |                            |                  |                      |
|--------------------|----------------------------|------------------|----------------------|
| Sample Name:       | ZZJ-3-22-3-rac-AD-30%254nm | Acquired By:     | System               |
| Sample Type:       | Unknown                    | Date Acquired:   | 1/25/2018 2:58:44 PM |
| Vial:              | 1                          | Acq. Method:     | 30% 254              |
| Injection #:       | 1                          | Date Processed:  | 1/25/2018 3:19:09 PM |
| Injection Volume:  | 20.00 ul                   | Channel Name:    | 2487Channel 1        |
| Run Time:          | 120.00 Minutes             | Sample Set Name: |                      |

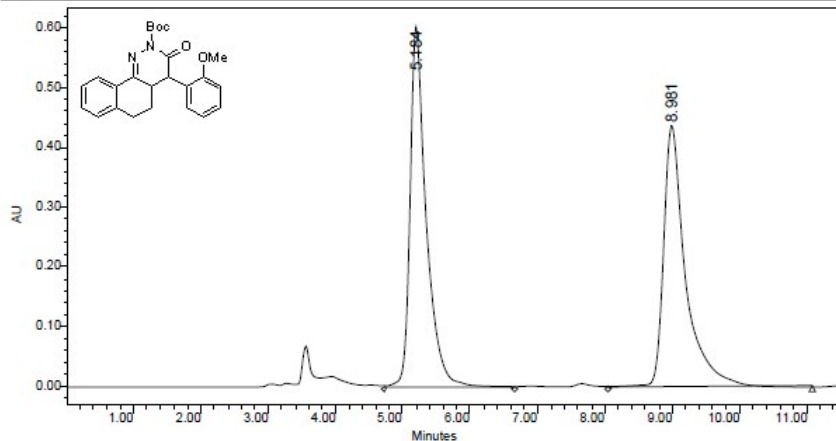

|   | RT (min) | Area (V*sec) | % Area | Height (V) | % Height |
|---|----------|--------------|--------|------------|----------|
| 1 | 5.184    | 10081730     | 50.30  | 602776     | 57.97    |
| 2 | 8.981    | 9962893      | 49.70  | 437077     | 42.03    |

| SAMPLE INFORMATION |                            |                  |                      |
|--------------------|----------------------------|------------------|----------------------|
| Sample Name:       | ZZJ-3-22-3-asy-AD-30%254nm | Acquired By:     | System               |
| Sample Type:       | Unknown                    | Date Acquired:   | 1/25/2018 4:20:56 PM |
| Vial:              | 1                          | Acq. Method:     | 30% 254              |
| Injection #:       | 1                          | Date Processed:  | 1/25/2018 4:33:31 PM |
| Injection Volume:  | 20.00 ul                   | Channel Name:    | 2487Channel 1        |
| Run Time:          | 120.00 Minutes             | Sample Set Name: |                      |

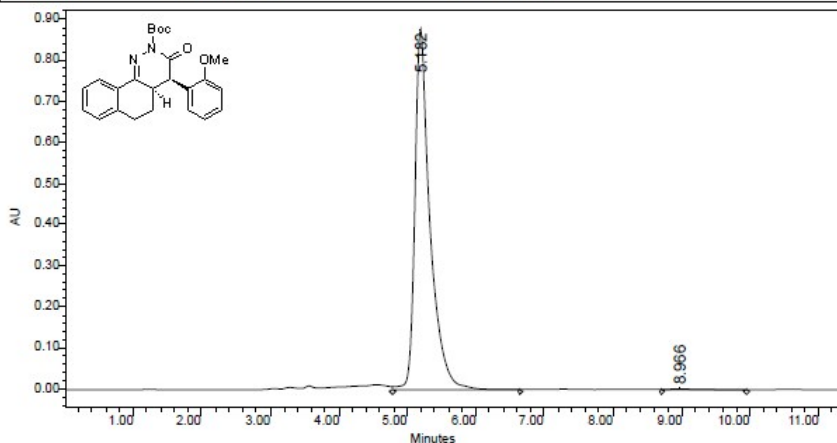

|   | RT (min) | Area (V*sec) | % Area | Height (V) | % Height |
|---|----------|--------------|--------|------------|----------|
| 1 | 5.182    | 13472556     | 99.57  | 876946     | 99.80    |
| 2 | 8.966    | 58130        | 0.43   | 1791       | 0.20     |

(3am)

| SAMPLE INFORMATION |                            |                  |                      |
|--------------------|----------------------------|------------------|----------------------|
| Sample Name:       | ZZJ-3-22-4-rac-AD-30%254nm | Acquired By:     | System               |
| Sample Type:       | Unknown                    | Date Acquired:   | 1/25/2018 3:21:01 PM |
| Vial:              | 1                          | Acq. Method:     | 30% 254              |
| Injection #:       | 1                          | Date Processed:  | 1/25/2018 3:41:42 PM |
| Injection Volume:  | 20.00 ul                   | Channel Name:    | 2487Channel 1        |
| Run Time:          | 120.00 Minutes             | Sample Set Name: |                      |

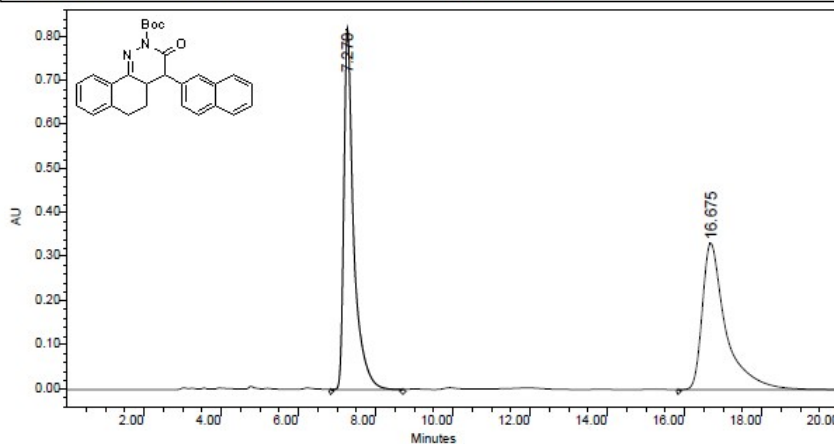

|   | RT (min) | Area (V*sec) | % Area | Height (V) | % Height |
|---|----------|--------------|--------|------------|----------|
| 1 | 7.270    | 14525871     | 50.80  | 820266     | 71.14    |
| 2 | 16.675   | 14066109     | 49.20  | 332821     | 28.86    |

| SAMPLE INFORMATION |                            |                  |                      |
|--------------------|----------------------------|------------------|----------------------|
| Sample Name:       | ZZJ-3-22-4-asy-AD-30%254nm | Acquired By:     | System               |
| Sample Type:       | Unknown                    | Date Acquired:   | 1/25/2018 4:38:58 PM |
| Vial:              | 1                          | Acq. Method:     | 30% 254              |
| Injection #:       | 1                          | Date Processed:  | 1/25/2018 5:03:52 PM |
| Injection Volume:  | 20.00 ul                   | Channel Name:    | 2487Channel 1        |
| Run Time:          | 120.00 Minutes             | Sample Set Name: |                      |

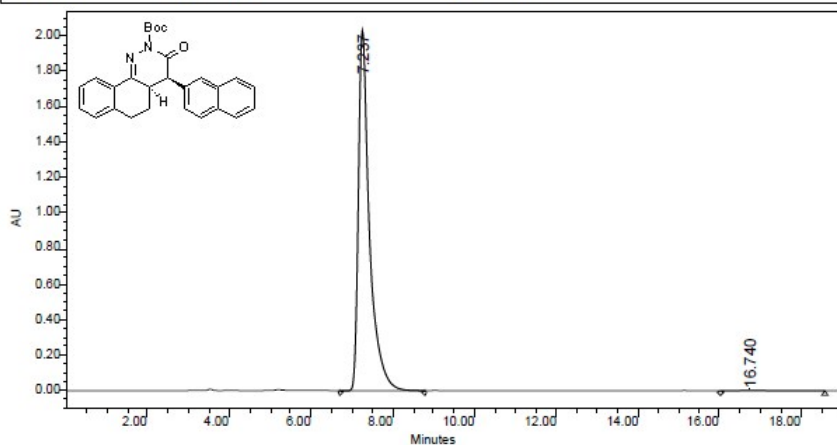

|   | RT (min) | Area (V*sec) | % Area | Height (V) | % Height |
|---|----------|--------------|--------|------------|----------|
| 1 | 7.237    | 38441430     | 99.70  | 2037736    | 99.89    |
| 2 | 16.740   | 117179       | 0.30   | 2344       | 0.11     |



(3an)

| SAMPLE INFORMATION |                                |                  |                      |
|--------------------|--------------------------------|------------------|----------------------|
| Sample Name:       | ZZJ-3-23-1-rac-new-AD-30%254nn | Acquired By:     | System               |
| Sample Type:       | Unknown                        | Date Acquired:   | 1/27/2018 3:43:40 PM |
| Vial:              | 1                              | Acq. Method:     | 30% 254              |
| Injection #:       | 1                              | Date Processed:  | 1/27/2018 4:00:02 PM |
| Injection Volume:  | 20.00 ul                       | Channel Name:    | 2487Channel 1        |
| Run Time:          | 120.00 Minutes                 | Sample Set Name: |                      |

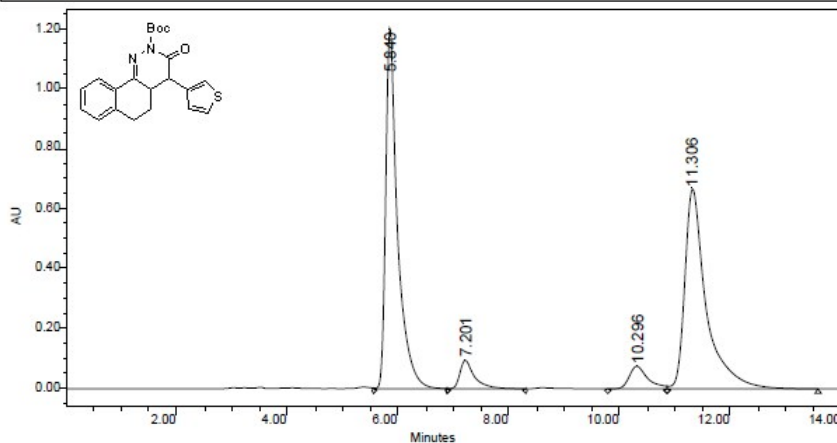

|   | RT (min) | Area (V*sec) | % Area | Height (V) | % Height |
|---|----------|--------------|--------|------------|----------|
| 1 | 5.840    | 18035114     | 45.75  | 1207772    | 59.03    |
| 2 | 7.201    | 1757545      | 4.46   | 95340      | 4.66     |
| 3 | 10.296   | 1758575      | 4.46   | 75512      | 3.69     |
| 4 | 11.306   | 17872234     | 45.33  | 667477     | 32.62    |

| SAMPLE INFORMATION |                            |                  |                      |
|--------------------|----------------------------|------------------|----------------------|
| Sample Name:       | ZZJ-3-23-1-asy-AD-30%254nm | Acquired By:     | System               |
| Sample Type:       | Unknown                    | Date Acquired:   | 1/27/2018 5:40:44 PM |
| Vial:              | 1                          | Acq. Method:     | 30% 254              |
| Injection #:       | 1                          | Date Processed:  | 1/27/2018 5:55:25 PM |
| Injection Volume:  | 20.00 ul                   | Channel Name:    | 2487Channel 1        |
| Run Time:          | 120.00 Minutes             | Sample Set Name: |                      |

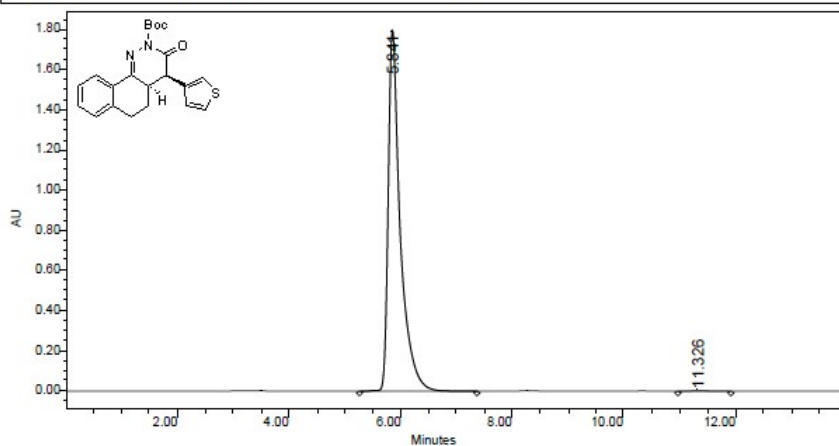

|   | RT (min) | Area (V*sec) | % Area | Height (V) | % Height |
|---|----------|--------------|--------|------------|----------|
| 1 | 5.841    | 26966775     | 99.82  | 1804878    | 99.89    |
| 2 | 11.326   | 48233        | 0.18   | 2005       | 0.11     |

(3ao)

| SAMPLE INFORMATION |                                |                  |                      |
|--------------------|--------------------------------|------------------|----------------------|
| Sample Name:       | ZZJ-3-23-2-rac-new-AD-30%254nm | Acquired By:     | System               |
| Sample Type:       | Unknown                        | Date Acquired:   | 1/27/2018 4:12:29 PM |
| Vial:              | 1                              | Acq. Method:     | 30% 254              |
| Injection #:       | 1                              | Date Processed:  | 1/27/2018 5:02:25 PM |
| Injection Volume:  | 20.00 ul                       | Channel Name:    | 2487Channel 1        |
| Run Time:          | 120.00 Minutes                 | Sample Set Name: |                      |

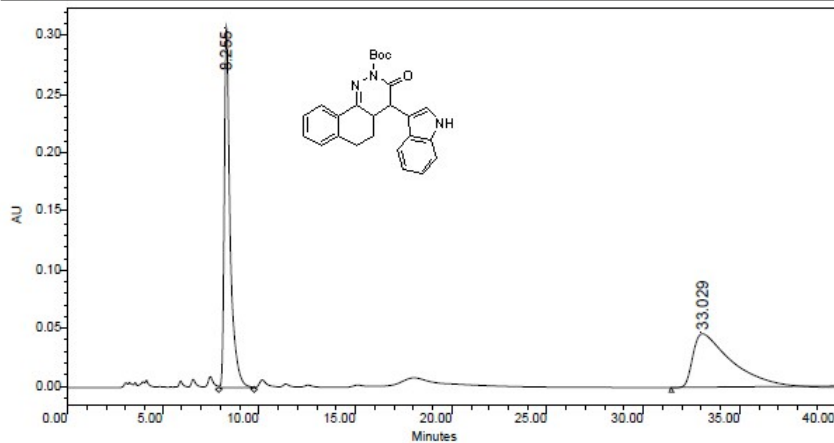

|   | RT (min) | Area (V*sec) | % Area | Height (V) | % Height |
|---|----------|--------------|--------|------------|----------|
| 1 | 8.255    | 6566176      | 50.03  | 308477     | 87.04    |
| 2 | 33.029   | 6557325      | 49.97  | 45949      | 12.96    |

| SAMPLE INFORMATION |                            |                  |                      |
|--------------------|----------------------------|------------------|----------------------|
| Sample Name:       | ZZJ-3-23-2-asy-AD-30%254nm | Acquired By:     | System               |
| Sample Type:       | Unknown                    | Date Acquired:   | 1/27/2018 6:28:24 PM |
| Vial:              | 1                          | Acq. Method:     | 30% 254              |
| Injection #:       | 2                          | Date Processed:  | 1/27/2018 7:10:26 PM |
| Injection Volume:  | 20.00 ul                   | Channel Name:    | 2487Channel 1        |
| Run Time:          | 120.00 Minutes             | Sample Set Name: |                      |

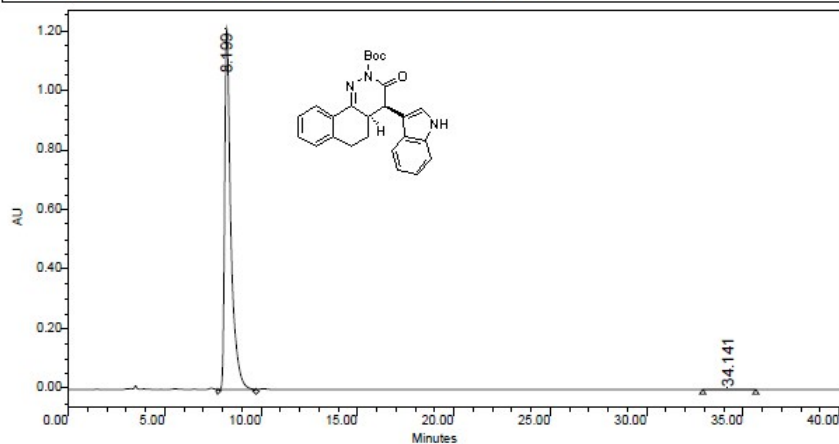

|   | RT (min) | Area (V*sec) | % Area | Height (V) | % Height |
|---|----------|--------------|--------|------------|----------|
| 1 | 8.199    | 27190997     | 99.85  | 1207184    | 99.96    |
| 2 | 34.141   | 40697        | 0.15   | 526        | 0.04     |

(3ap)

| SAMPLE INFORMATION |                            |                  |                      |
|--------------------|----------------------------|------------------|----------------------|
| Sample Name:       | ZZJ-3-23-3-rac-AD-30%254nm | Acquired By:     | System               |
| Sample Type:       | Unknown                    | Date Acquired:   | 1/27/2018 5:04:11 PM |
| Vial:              | 1                          | Acq. Method:     | 30% 254              |
| Injection #:       | 1                          | Date Processed:  | 1/27/2018 5:17:47 PM |
| Injection Volume:  | 20.00 ul                   | Channel Name:    | 2487Channel 1        |
| Run Time:          | 120.00 Minutes             | Sample Set Name: |                      |

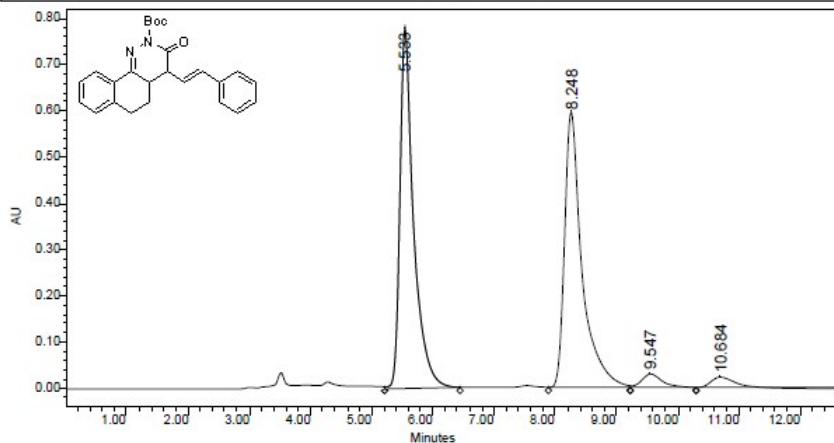

|   | RT (min) | Area (V*sec) | % Area | Height (V) | % Height |
|---|----------|--------------|--------|------------|----------|
| 1 | 5.533    | 12176418     | 47.07  | 779133     | 54.30    |
| 2 | 8.248    | 12016896     | 46.46  | 598840     | 41.73    |
| 3 | 9.547    | 853007       | 3.30   | 31929      | 2.23     |
| 4 | 10.684   | 820690       | 3.17   | 25006      | 1.74     |

| SAMPLE INFORMATION |                            |                  |                      |
|--------------------|----------------------------|------------------|----------------------|
| Sample Name:       | ZZJ-3-23-3-asy-AD-30%254nm | Acquired By:     | System               |
| Sample Type:       | Unknown                    | Date Acquired:   | 1/27/2018 6:07:52 PM |
| Vial:              | 1                          | Acq. Method:     | 30% 254              |
| Injection #:       | 1                          | Date Processed:  | 1/27/2018 6:18:21 PM |
| Injection Volume:  | 20.00 ul                   | Channel Name:    | 2487Channel 1        |
| Run Time:          | 120.00 Minutes             | Sample Set Name: |                      |

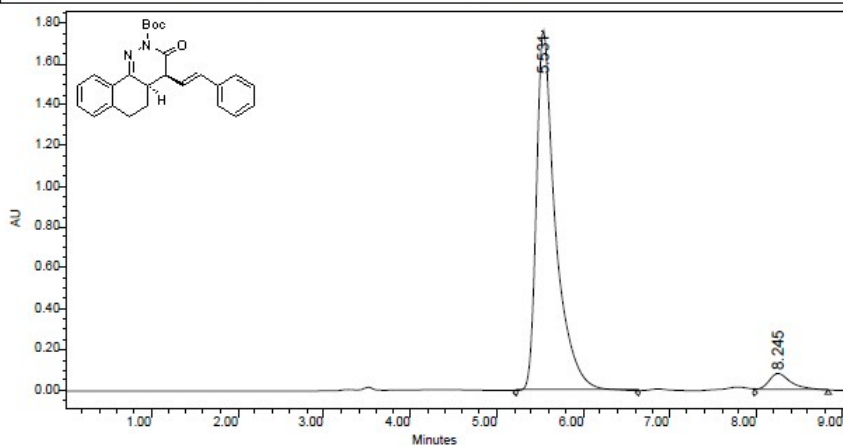

|   | RT (min) | Area (V*sec) | % Area | Height (V) | % Height |
|---|----------|--------------|--------|------------|----------|
| 1 | 5.531    | 27126848     | 94.80  | 1764959    | 95.60    |
| 2 | 8.245    | 1487432      | 5.20   | 81307      | 4.40     |

(3aq)

| SAMPLE INFORMATION |                            |                  |                     |
|--------------------|----------------------------|------------------|---------------------|
| Sample Name:       | ZZJ-3-28-4-rac-AD-30%254nm | Acquired By:     | System              |
| Sample Type:       | Unknown                    | Date Acquired:   | 2/1/2018 2:22:50 PM |
| Vial:              | 1                          | Acq. Method:     | 30% 254             |
| Injection #:       | 1                          | Date Processed:  | 2/1/2018 2:29:39 PM |
| Injection Volume:  | 20.00 ul                   | Channel Name:    | 2487Channel 1       |
| Run Time:          | 120.00 Minutes             | Sample Set Name: |                     |

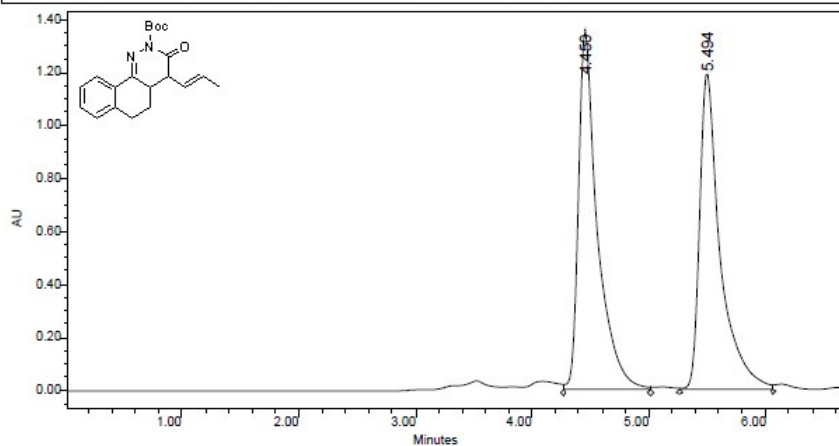

| RT (min) | Area (V*sec) | % Area   | Height (V) | % Height |       |
|----------|--------------|----------|------------|----------|-------|
| 1        | 4.450        | 15381636 | 51.18      | 1355048  | 53.17 |
| 2        | 5.494        | 14670879 | 48.82      | 1193488  | 46.83 |

| SAMPLE INFORMATION |                            |                  |                     |
|--------------------|----------------------------|------------------|---------------------|
| Sample Name:       | ZZJ-3-28-4-asy-AD-30%254nm | Acquired By:     | System              |
| Sample Type:       | Unknown                    | Date Acquired:   | 2/1/2018 6:03:48 PM |
| Vial:              | 1                          | Acq. Method:     | 30% 254             |
| Injection #:       | 1                          | Date Processed:  | 2/1/2018 6:11:25 PM |
| Injection Volume:  | 20.00 ul                   | Channel Name:    | 2487Channel 1       |
| Run Time:          | 120.00 Minutes             | Sample Set Name: |                     |

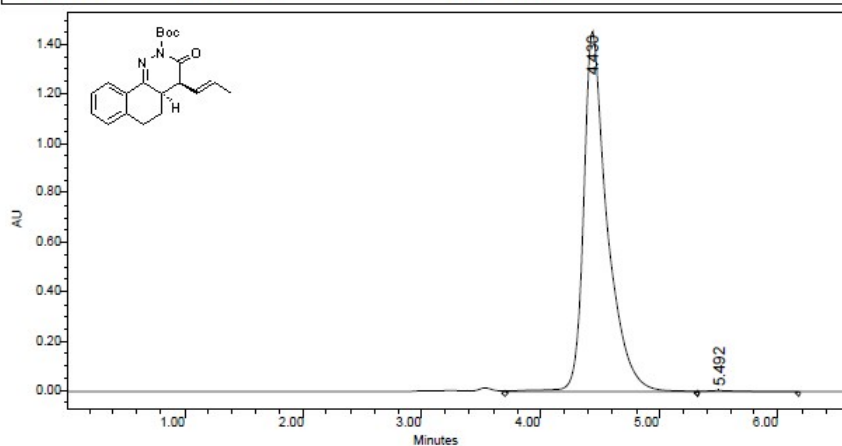

| RT (min) | Area (V*sec) | % Area   | Height (V) | % Height |       |
|----------|--------------|----------|------------|----------|-------|
| 1        | 4.430        | 20107282 | 99.69      | 1456373  | 99.75 |
| 2        | 5.492        | 61687    | 0.31       | 3592     | 0.25  |

(3ar)

| SAMPLE INFORMATION |                            |                  |                     |
|--------------------|----------------------------|------------------|---------------------|
| Sample Name:       | ZZJ-3-28-3-rac-AD-30%254nm | Acquired By:     | System              |
| Sample Type:       | Unknown                    | Date Acquired:   | 2/1/2018 2:00:24 PM |
| Vial:              | 1                          | Acq. Method:     | 30% 254             |
| Injection #:       | 1                          | Date Processed:  | 2/1/2018 2:23:36 PM |
| Injection Volume:  | 20.00 ul                   | Channel Name:    | 2487Channel 1       |
| Run Time:          | 120.00 Minutes             | Sample Set Name: |                     |

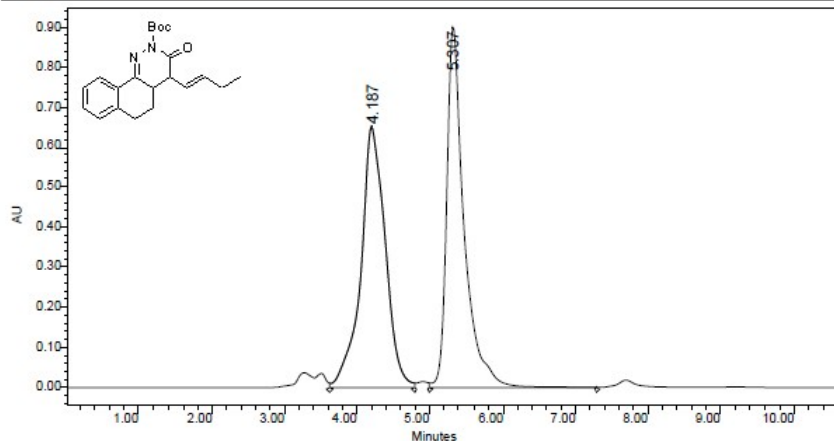

|   | RT (min) | Area (V*sec) | % Area | Height (V) | % Height |
|---|----------|--------------|--------|------------|----------|
| 1 | 4.187    | 15247241     | 50.29  | 653606     | 41.92    |
| 2 | 5.307    | 15069168     | 49.71  | 905599     | 58.08    |

| SAMPLE INFORMATION |                            |                  |                     |
|--------------------|----------------------------|------------------|---------------------|
| Sample Name:       | ZZJ-3-28-3-asy-AD-30%254nm | Acquired By:     | System              |
| Sample Type:       | Unknown                    | Date Acquired:   | 2/1/2018 5:48:04 PM |
| Vial:              | 1                          | Acq. Method:     | 30% 254             |
| Injection #:       | 1                          | Date Processed:  | 2/1/2018 5:56:49 PM |
| Injection Volume:  | 20.00 ul                   | Channel Name:    | 2487Channel 1       |
| Run Time:          | 120.00 Minutes             | Sample Set Name: |                     |

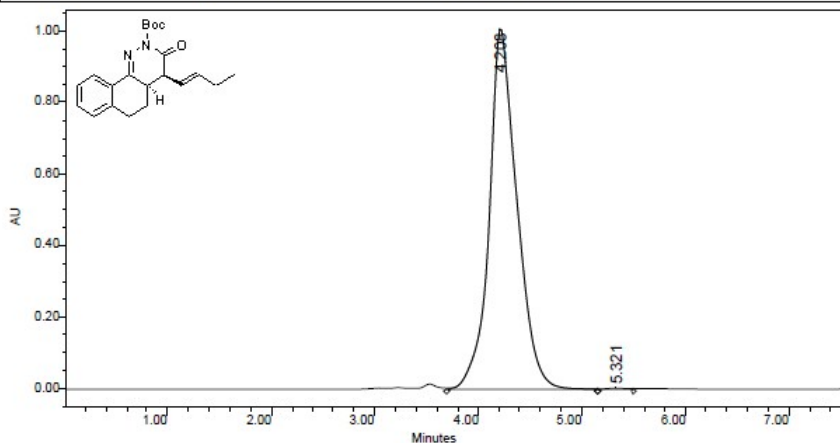

|   | RT (min) | Area (V*sec) | % Area | Height (V) | % Height |
|---|----------|--------------|--------|------------|----------|
| 1 | 4.208    | 18783847     | 99.75  | 1010426    | 99.68    |
| 2 | 5.321    | 47021        | 0.25   | 3252       | 0.32     |

(3da)

| SAMPLE INFORMATION |                            |                  |                     |
|--------------------|----------------------------|------------------|---------------------|
| Sample Name:       | ZZJ-3-34-1-rac-AD-30%254nm | Acquired By:     | System              |
| Sample Type:       | Unknown                    | Date Acquired:   | 3/8/2018 3:12:14 PM |
| Vial:              | 1                          | Acq. Method:     | 30% 254             |
| Injection #:       | 1                          | Date Processed:  | 3/8/2018 3:28:50 PM |
| Injection Volume:  | 20.00 ul                   | Channel Name:    | 2487Channel 1       |
| Run Time:          | 120.00 Minutes             | Sample Set Name: |                     |

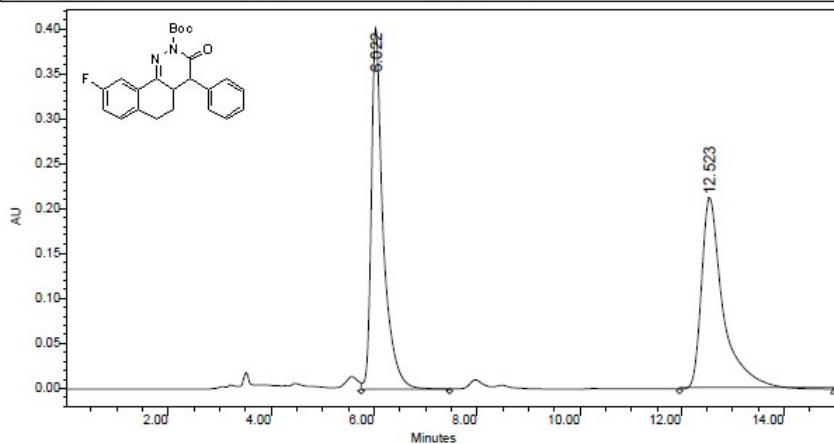

|   | RT (min) | Area (V*sec) | % Area | Height (V) | % Height |
|---|----------|--------------|--------|------------|----------|
| 1 | 6.022    | 6435522      | 50.49  | 401687     | 65.36    |
| 2 | 12.523   | 6311290      | 49.51  | 212916     | 34.64    |

| SAMPLE INFORMATION |                            |                  |                     |
|--------------------|----------------------------|------------------|---------------------|
| Sample Name:       | ZZJ-3-34-1-asy-AD-30%254nm | Acquired By:     | System              |
| Sample Type:       | Unknown                    | Date Acquired:   | 3/8/2018 4:13:59 PM |
| Vial:              | 1                          | Acq. Method:     | 30% 254             |
| Injection #:       | 1                          | Date Processed:  | 3/8/2018 4:29:11 PM |
| Injection Volume:  | 20.00 ul                   | Channel Name:    | 2487Channel 1       |
| Run Time:          | 120.00 Minutes             | Sample Set Name: |                     |

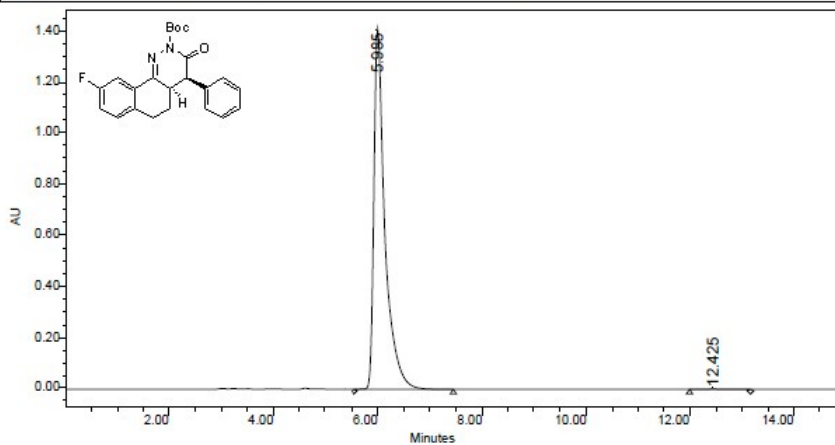

|   | RT (min) | Area (V*sec) | % Area | Height (V) | % Height |
|---|----------|--------------|--------|------------|----------|
| 1 | 5.985    | 20763633     | 99.88  | 1409017    | 99.93    |
| 2 | 12.425   | 25663        | 0.12   | 1039       | 0.07     |

(3ea)

| SAMPLE INFORMATION |                            |                  |                      |
|--------------------|----------------------------|------------------|----------------------|
| Sample Name:       | ZZJ-3-30-1-rac-AD-30%254nm | Acquired By:     | System               |
| Sample Type:       | Unknown                    | Date Acquired:   | 2/24/2018 3:03:44 PM |
| Vial:              | 1                          | Acq. Method:     | 30% 254              |
| Injection #:       | 1                          | Date Processed:  | 2/24/2018 3:33:37 PM |
| Injection Volume:  | 20.00 ul                   | Channel Name:    | 2487Channel 1        |
| Run Time:          | 120.00 Minutes             | Sample Set Name: |                      |

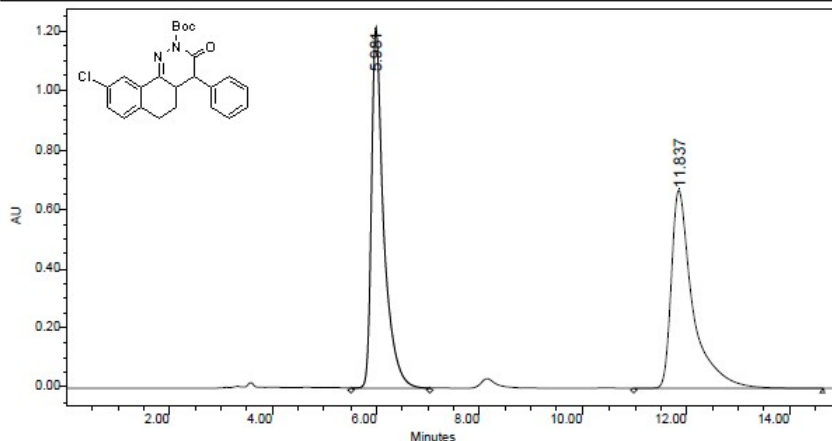

| RT (min) | Area (V*sec) | % Area | Height (V) | % Height |
|----------|--------------|--------|------------|----------|
| 1        | 19984571     | 50.89  | 1213659    | 64.52    |
| 2        | 19289293     | 49.11  | 667422     | 35.48    |

| SAMPLE INFORMATION |                            |                  |                      |
|--------------------|----------------------------|------------------|----------------------|
| Sample Name:       | ZZJ-3-30-1-asy-AD-30%254nm | Acquired By:     | System               |
| Sample Type:       | Unknown                    | Date Acquired:   | 2/24/2018 4:55:53 PM |
| Vial:              | 1                          | Acq. Method:     | 30% 254              |
| Injection #:       | 1                          | Date Processed:  | 2/24/2018 5:09:58 PM |
| Injection Volume:  | 20.00 ul                   | Channel Name:    | 2487Channel 1        |
| Run Time:          | 120.00 Minutes             | Sample Set Name: |                      |

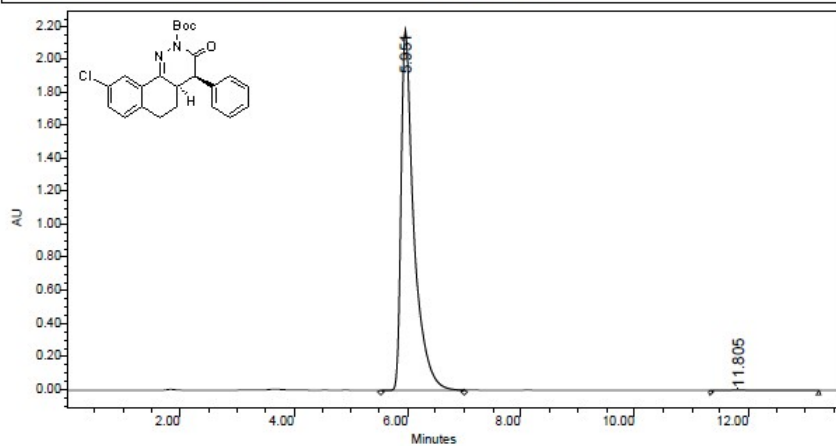

| RT (min) | Area (V*sec) | % Area | Height (V) | % Height |
|----------|--------------|--------|------------|----------|
| 1        | 34217921     | 99.82  | 2185437    | 99.90    |
| 2        | 60829        | 0.18   | 2140       | 0.10     |

(3fa)

| SAMPLE INFORMATION |                            |                  |                     |  |  |
|--------------------|----------------------------|------------------|---------------------|--|--|
| Sample Name:       | ZZJ-3-33-1-rac-AD-30%254nm | Acquired By:     | System              |  |  |
| Sample Type:       | Unknown                    | Date Acquired:   | 3/6/2018 1:48:07 PM |  |  |
| Vial:              | 1                          | Acq. Method:     | 30% 254             |  |  |
| Injection #:       | 1                          | Date Processed:  | 3/6/2018 2:05:08 PM |  |  |
| Injection Volume:  | 20.00 ul                   | Channel Name:    | 2487Channel 1       |  |  |
| Run Time:          | 120.00 Minutes             | Sample Set Name: |                     |  |  |

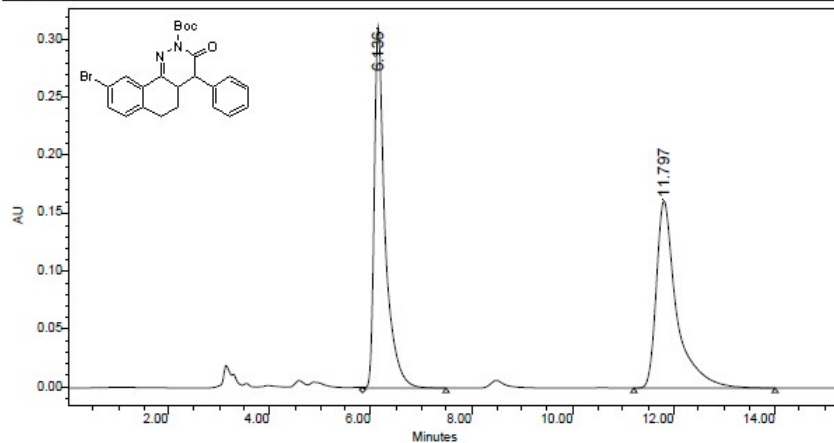

|   | RT (min) | Area (V*sec) | % Area | Height (V) | % Height |
|---|----------|--------------|--------|------------|----------|
| 1 | 6.136    | 4641213      | 50.72  | 310794     | 65.82    |
| 2 | 11.797   | 4509101      | 49.28  | 161372     | 34.18    |

| SAMPLE INFORMATION |                            |                  |                     |  |  |
|--------------------|----------------------------|------------------|---------------------|--|--|
| Sample Name:       | ZZJ-3-33-1-asy-AD-30%254nm | Acquired By:     | System              |  |  |
| Sample Type:       | Unknown                    | Date Acquired:   | 3/6/2018 4:04:54 PM |  |  |
| Vial:              | 1                          | Acq. Method:     | 30% 254             |  |  |
| Injection #:       | 1                          | Date Processed:  | 3/6/2018 4:20:10 PM |  |  |
| Injection Volume:  | 20.00 ul                   | Channel Name:    | 2487Channel 1       |  |  |
| Run Time:          | 120.00 Minutes             | Sample Set Name: |                     |  |  |

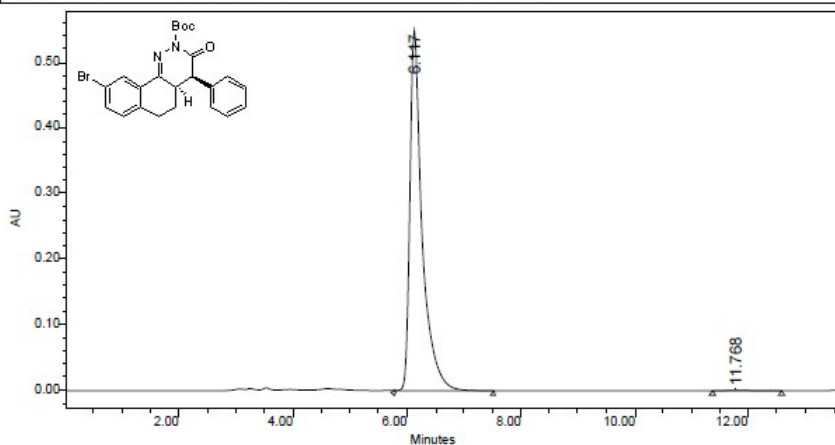

|   | RT (min) | Area (V*sec) | % Area | Height (V) | % Height |
|---|----------|--------------|--------|------------|----------|
| 1 | 6.117    | 8222254      | 99.77  | 549298     | 99.87    |
| 2 | 11.768   | 18685        | 0.23   | 716        | 0.13     |



(3ga)

| SAMPLE INFORMATION |                            |                  |                      |
|--------------------|----------------------------|------------------|----------------------|
| Sample Name:       | ZZJ-3-30-2-rac-AD-30%254nm | Acquired By:     | System               |
| Sample Type:       | Unknown                    | Date Acquired:   | 2/24/2018 3:32:32 PM |
| Vial:              | 1                          | Acq. Method:     | 30% 254              |
| Injection #:       | 1                          | Date Processed:  | 2/24/2018 3:53:07 PM |
| Injection Volume:  | 20.00 ul                   | Channel Name:    | 2487Channel 1        |
| Run Time:          | 120.00 Minutes             | Sample Set Name: |                      |

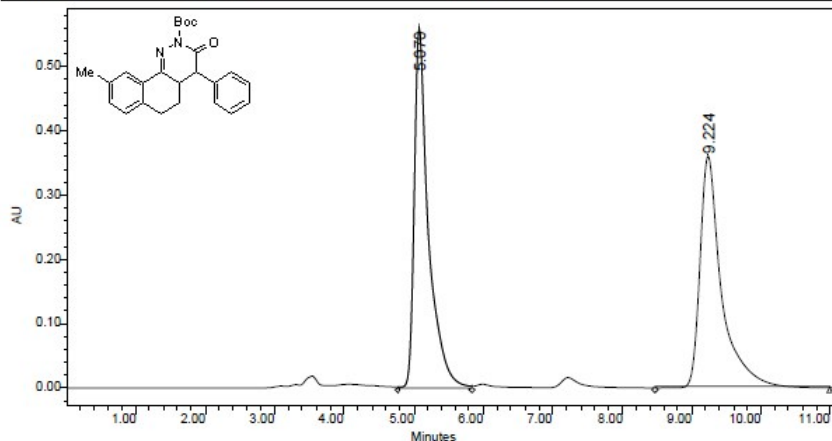

|   | RT (min) | Area (V*sec) | % Area | Height (V) | % Height |
|---|----------|--------------|--------|------------|----------|
| 1 | 5.070    | 7935775      | 50.37  | 561029     | 60.83    |
| 2 | 9.224    | 7820110      | 49.63  | 361289     | 39.17    |

| SAMPLE INFORMATION |                            |                  |                      |
|--------------------|----------------------------|------------------|----------------------|
| Sample Name:       | ZZJ-3-30-2-asy-AD-30%254nm | Acquired By:     | System               |
| Sample Type:       | Unknown                    | Date Acquired:   | 2/24/2018 5:17:14 PM |
| Vial:              | 1                          | Acq. Method:     | 30% 254              |
| Injection #:       | 1                          | Date Processed:  | 2/24/2018 5:28:12 PM |
| Injection Volume:  | 20.00 ul                   | Channel Name:    | 2487Channel 1        |
| Run Time:          | 120.00 Minutes             | Sample Set Name: |                      |

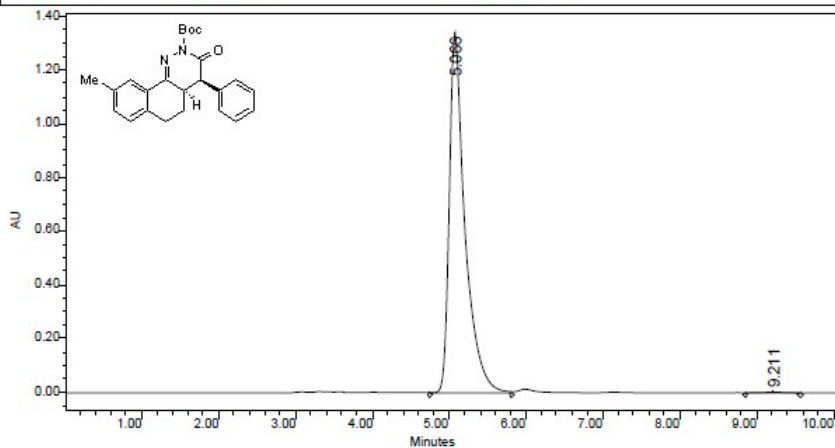

|   | RT (min) | Area (V*sec) | % Area | Height (V) | % Height |
|---|----------|--------------|--------|------------|----------|
| 1 | 5.066    | 19021134     | 99.67  | 1341551    | 99.80    |
| 2 | 9.211    | 63848        | 0.33   | 2677       | 0.20     |

(3ha)

| SAMPLE INFORMATION |                            |                  |                      |
|--------------------|----------------------------|------------------|----------------------|
| Sample Name:       | ZZJ-3-30-3-rac-AD-30%254nm | Acquired By:     | System               |
| Sample Type:       | Unknown                    | Date Acquired:   | 2/24/2018 3:54:48 PM |
| Vial:              | 1                          | Acq. Method:     | 30% 254              |
| Injection #:       | 1                          | Date Processed:  | 2/24/2018 4:26:49 PM |
| Injection Volume:  | 20.00 ul                   | Channel Name:    | 2487Channel 1        |
| Run Time:          | 120.00 Minutes             | Sample Set Name: |                      |

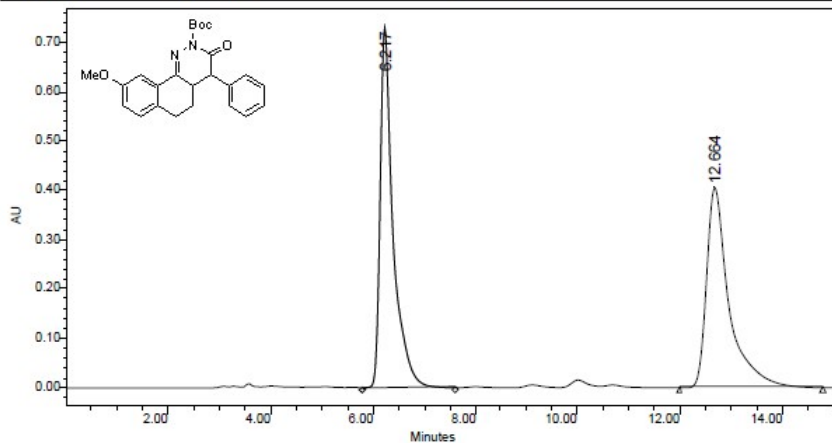

|   | RT (min) | Area (V*sec) | % Area | Height (V) | % Height |
|---|----------|--------------|--------|------------|----------|
| 1 | 6.217    | 12821304     | 50.76  | 731309     | 64.30    |
| 2 | 12.664   | 12437420     | 49.24  | 406028     | 35.70    |

| SAMPLE INFORMATION |                            |                  |                      |
|--------------------|----------------------------|------------------|----------------------|
| Sample Name:       | ZZJ-3-30-3-asy-AD-30%254nm | Acquired By:     | System               |
| Sample Type:       | Unknown                    | Date Acquired:   | 2/24/2018 5:35:06 PM |
| Vial:              | 1                          | Acq. Method:     | 30% 254              |
| Injection #:       | 1                          | Date Processed:  | 2/24/2018 5:53:49 PM |
| Injection Volume:  | 20.00 ul                   | Channel Name:    | 2487Channel 1        |
| Run Time:          | 120.00 Minutes             | Sample Set Name: |                      |

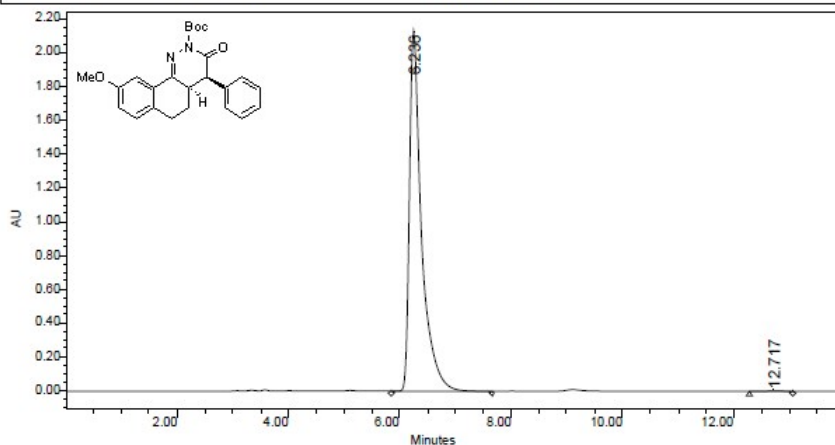

|   | RT (min) | Area (V*sec) | % Area | Height (V) | % Height |
|---|----------|--------------|--------|------------|----------|
| 1 | 6.236    | 32225853     | 99.87  | 2134512    | 99.91    |
| 2 | 12.717   | 41269        | 0.13   | 1818       | 0.09     |

(3ia)

| SAMPLE INFORMATION |                            |                  |                      |
|--------------------|----------------------------|------------------|----------------------|
| Sample Name:       | ZZJ-3-30-4-rac-AD-30%254nm | Acquired By:     | System               |
| Sample Type:       | Unknown                    | Date Acquired:   | 2/24/2018 4:25:46 PM |
| Vial:              | 1                          | Acq. Method:     | 30% 254              |
| Injection #:       | 1                          | Date Processed:  | 2/24/2018 4:45:49 PM |
| Injection Volume:  | 20.00 ul                   | Channel Name:    | 2487Channel 1        |
| Run Time:          | 120.00 Minutes             | Sample Set Name: |                      |

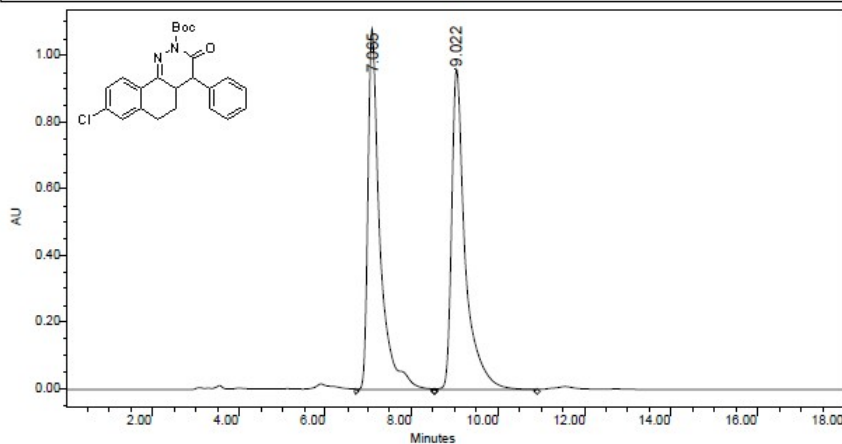

|   | RT (min) | Area (V*sec) | % Area | Height (V) | % Height |
|---|----------|--------------|--------|------------|----------|
| 1 | 7.065    | 20929387     | 49.92  | 1080836    | 52.93    |
| 2 | 9.022    | 20993693     | 50.08  | 961172     | 47.07    |

| SAMPLE INFORMATION |                            |                  |                      |
|--------------------|----------------------------|------------------|----------------------|
| Sample Name:       | ZZJ-3-30-4-asy-AD-30%254nm | Acquired By:     | System               |
| Sample Type:       | Unknown                    | Date Acquired:   | 2/24/2018 5:57:15 PM |
| Vial:              | 1                          | Acq. Method:     | 30% 254              |
| Injection #:       | 1                          | Date Processed:  | 2/24/2018 6:07:49 PM |
| Injection Volume:  | 20.00 ul                   | Channel Name:    | 2487Channel 1        |
| Run Time:          | 120.00 Minutes             | Sample Set Name: |                      |

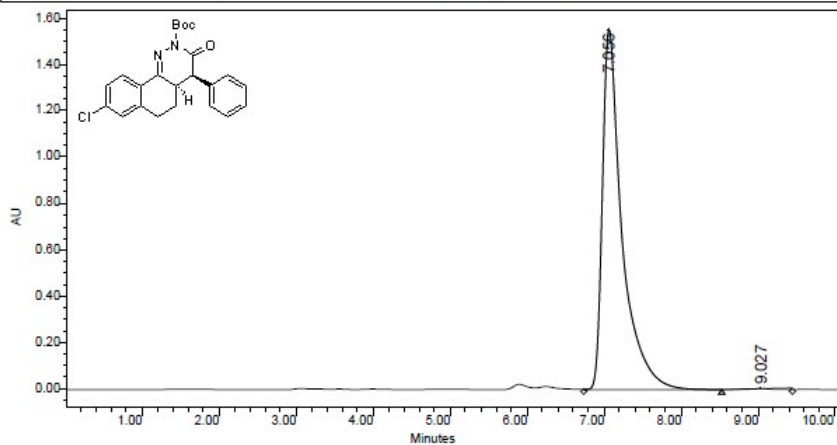

|   | RT (min) | Area (V*sec) | % Area | Height (V) | % Height |
|---|----------|--------------|--------|------------|----------|
| 1 | 7.056    | 27390348     | 99.69  | 1557717    | 99.75    |
| 2 | 9.027    | 85383        | 0.31   | 3892       | 0.25     |

(3ja)

| SAMPLE INFORMATION |                            |                  |                     |
|--------------------|----------------------------|------------------|---------------------|
| Sample Name:       | ZZJ-3-33-2-rac-AD-30%254nm | Acquired By:     | System              |
| Sample Type:       | Unknown                    | Date Acquired:   | 3/6/2018 2:18:07 PM |
| Vial:              | 1                          | Acq. Method:     | 30% 254             |
| Injection #:       | 1                          | Date Processed:  | 3/6/2018 2:39:16 PM |
| Injection Volume:  | 20.00 ul                   | Channel Name:    | 2487Channel 1       |
| Run Time:          | 120.00 Minutes             | Sample Set Name: |                     |

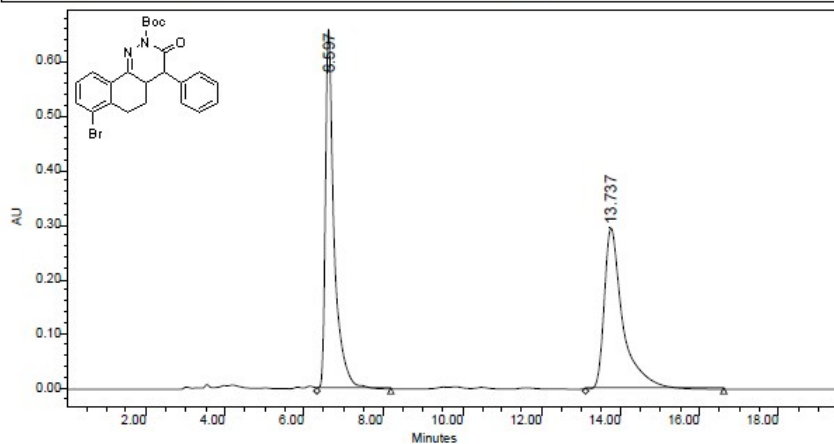

|   | RT (min) | Area (V*sec) | % Area | Height (V) | % Height |
|---|----------|--------------|--------|------------|----------|
| 1 | 6.597    | 10146410     | 51.07  | 659385     | 69.06    |
| 2 | 13.737   | 9722031      | 48.93  | 295369     | 30.94    |

| SAMPLE INFORMATION |                            |                  |                     |
|--------------------|----------------------------|------------------|---------------------|
| Sample Name:       | ZZJ-3-33-2-asy-AD-30%254nm | Acquired By:     | System              |
| Sample Type:       | Unknown                    | Date Acquired:   | 3/6/2018 4:27:46 PM |
| Vial:              | 1                          | Acq. Method:     | 30% 254             |
| Injection #:       | 1                          | Date Processed:  | 3/6/2018 4:46:25 PM |
| Injection Volume:  | 20.00 ul                   | Channel Name:    | 2487Channel 1       |
| Run Time:          | 120.00 Minutes             | Sample Set Name: |                     |

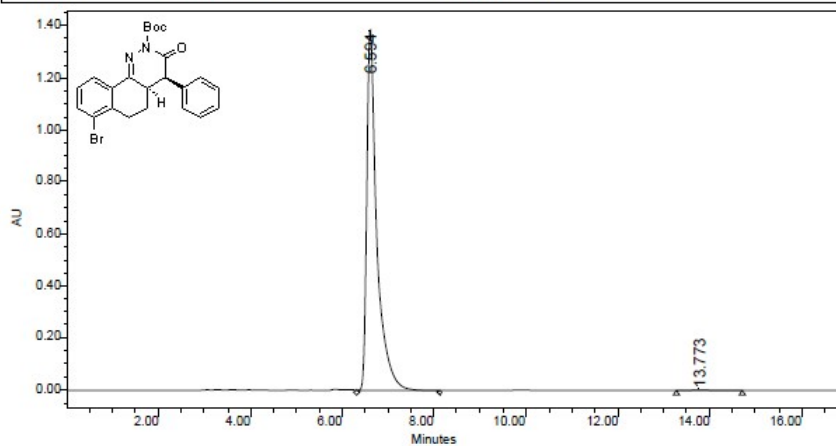

|   | RT (min) | Area (V*sec) | % Area | Height (V) | % Height |
|---|----------|--------------|--------|------------|----------|
| 1 | 6.594    | 21166902     | 99.78  | 1390340    | 99.89    |
| 2 | 13.773   | 47250        | 0.22   | 1590       | 0.11     |

(3ka)

| SAMPLE INFORMATION |                            |                  |                     |
|--------------------|----------------------------|------------------|---------------------|
| Sample Name:       | ZZJ-3-33-3-rac-AD-30%254nm | Acquired By:     | System              |
| Sample Type:       | Unknown                    | Date Acquired:   | 3/6/2018 2:54:07 PM |
| Vial:              | 1                          | Acq. Method:     | 30% 254             |
| Injection #:       | 1                          | Date Processed:  | 3/6/2018 3:12:48 PM |
| Injection Volume:  | 20.00 ul                   | Channel Name:    | 2487Channel 1       |
| Run Time:          | 120.00 Minutes             | Sample Set Name: |                     |

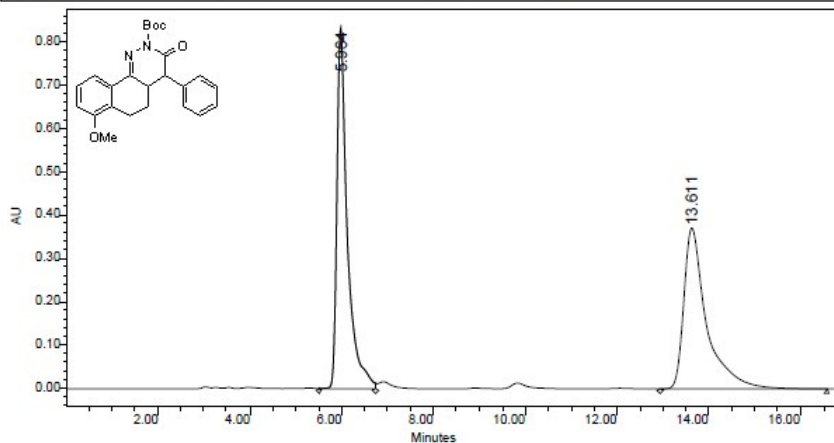

|   | RT (min) | Area (V*sec) | % Area | Height (V) | % Height |
|---|----------|--------------|--------|------------|----------|
| 1 | 5.964    | 13157529     | 50.82  | 832661     | 69.16    |
| 2 | 13.611   | 12733544     | 49.18  | 371367     | 30.84    |

| SAMPLE INFORMATION |                            |                  |                     |
|--------------------|----------------------------|------------------|---------------------|
| Sample Name:       | ZZJ-3-33-3-asy-AD-30%254nm | Acquired By:     | System              |
| Sample Type:       | Unknown                    | Date Acquired:   | 3/6/2018 4:55:28 PM |
| Vial:              | 1                          | Acq. Method:     | 30% 254             |
| Injection #:       | 1                          | Date Processed:  | 3/6/2018 5:10:59 PM |
| Injection Volume:  | 20.00 ul                   | Channel Name:    | 2487Channel 1       |
| Run Time:          | 120.00 Minutes             | Sample Set Name: |                     |

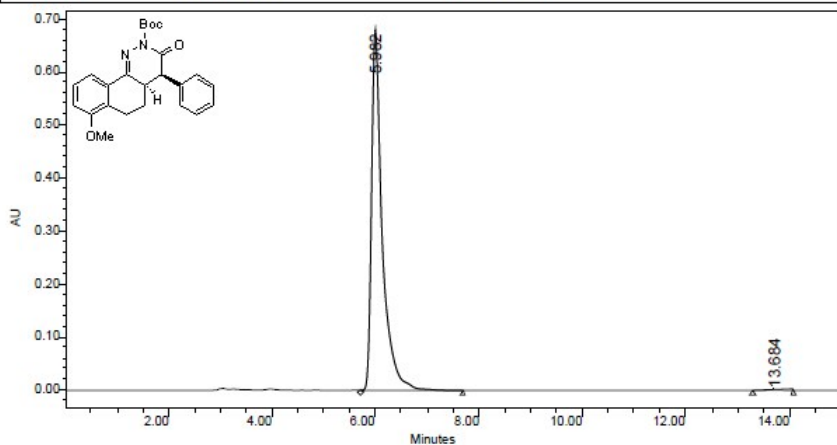

|   | RT (min) | Area (V*sec) | % Area | Height (V) | % Height |
|---|----------|--------------|--------|------------|----------|
| 1 | 5.982    | 9794836      | 99.88  | 679607     | 99.92    |
| 2 | 13.684   | 11844        | 0.12   | 523        | 0.08     |

(9)

| SAMPLE INFORMATION |                          |                  |                      |
|--------------------|--------------------------|------------------|----------------------|
| Sample Name:       | ZZJ-3-37-rac-OD-30%254nm | Acquired By:     | System               |
| Sample Type:       | Unknown                  | Date Acquired:   | 3/13/2018 4:31:55 PM |
| Vial:              | 1                        | Acq. Method:     | 30% 254              |
| Injection #:       | 1                        | Date Processed:  | 3/13/2018 4:48:17 PM |
| Injection Volume:  | 20.00 ul                 | Channel Name:    | 2487Channel 1        |
| Run Time:          | 120.00 Minutes           | Sample Set Name: |                      |

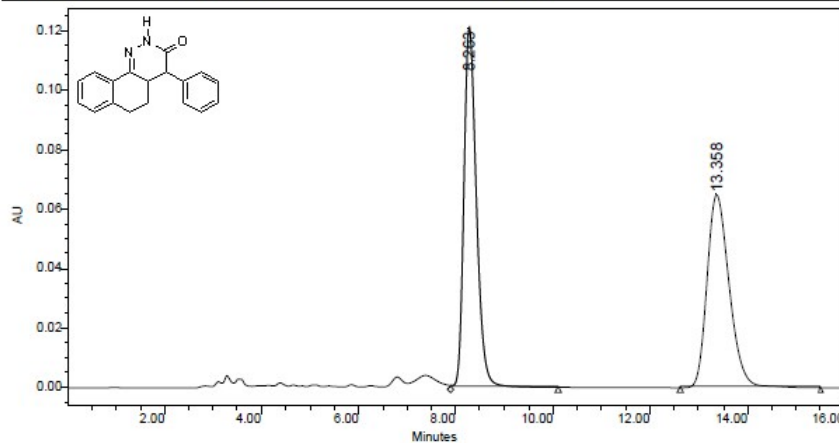

|   | RT (min) | Area (V*sec) | % Area | Height (V) | % Height |
|---|----------|--------------|--------|------------|----------|
| 1 | 8.263    | 2163523      | 51.13  | 121146     | 65.11    |
| 2 | 13.358   | 2067620      | 48.87  | 64924      | 34.89    |

| SAMPLE INFORMATION |                          |                  |                      |
|--------------------|--------------------------|------------------|----------------------|
| Sample Name:       | ZZJ-3-37-asy-OD-30%254nm | Acquired By:     | System               |
| Sample Type:       | Unknown                  | Date Acquired:   | 3/13/2018 4:03:15 PM |
| Vial:              | 1                        | Acq. Method:     | 30% 254              |
| Injection #:       | 1                        | Date Processed:  | 3/13/2018 4:38:01 PM |
| Injection Volume:  | 20.00 ul                 | Channel Name:    | 2487Channel 1        |
| Run Time:          | 120.00 Minutes           | Sample Set Name: |                      |

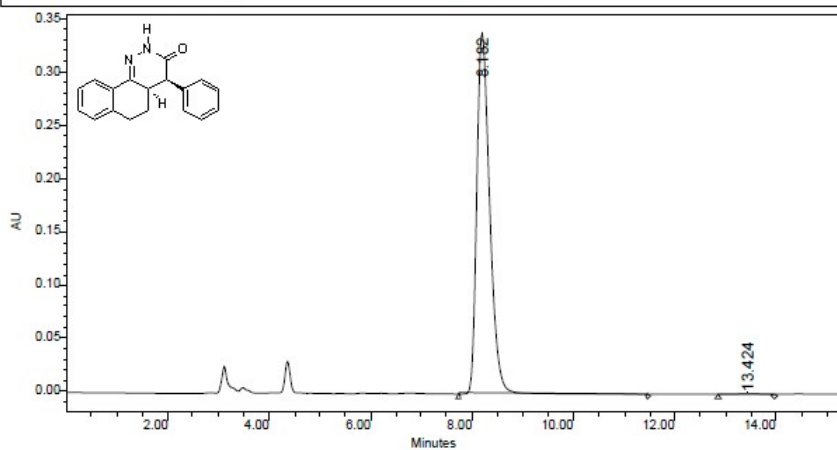

|   | RT (min) | Area (V*sec) | % Area | Height (V) | % Height |
|---|----------|--------------|--------|------------|----------|
| 1 | 8.182    | 6018287      | 99.82  | 338285     | 99.89    |
| 2 | 13.424   | 10829        | 0.18   | 356        | 0.11     |

(10)

| SAMPLE INFORMATION |                          |                  |                      |  |  |
|--------------------|--------------------------|------------------|----------------------|--|--|
| Sample Name:       | ZZJ-3-43-rac-OD-10%254nm | Acquired By:     | System               |  |  |
| Sample Type:       | Unknown                  | Date Acquired:   | 3/19/2018 7:36:47 PM |  |  |
| Vial:              | 1                        | Acq. Method:     | 10% 254              |  |  |
| Injection #:       | 1                        | Date Processed:  | 3/19/2018 8:39:16 PM |  |  |
| Injection Volume:  | 20.00 ul                 | Channel Name:    | 2487Channel 1        |  |  |
| Run Time:          | 120.00 Minutes           | Sample Set Name: |                      |  |  |

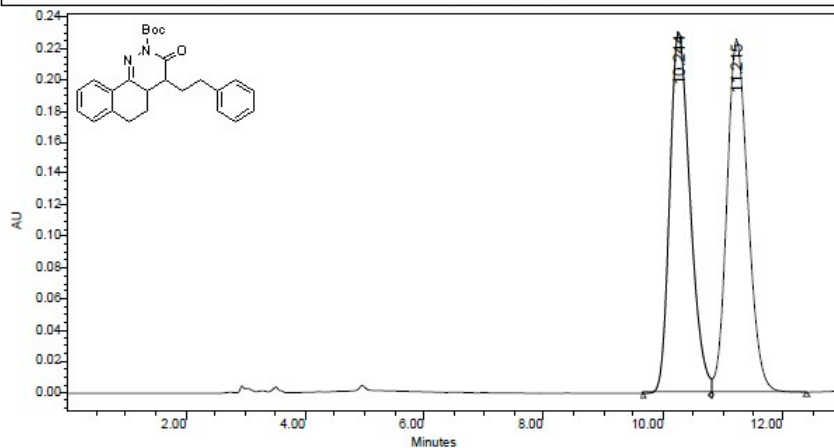

|   | RT (min) | Area (V*sec) | % Area | Height (V) | % Height |
|---|----------|--------------|--------|------------|----------|
| 1 | 10.244   | 5468166      | 49.72  | 230581     | 50.56    |
| 2 | 11.215   | 5530322      | 50.28  | 225465     | 49.44    |

| SAMPLE INFORMATION |                          |                  |                      |  |  |
|--------------------|--------------------------|------------------|----------------------|--|--|
| Sample Name:       | ZZJ-3-43-asy-OD-10%254nm | Acquired By:     | System               |  |  |
| Sample Type:       | Unknown                  | Date Acquired:   | 3/19/2018 8:04:14 PM |  |  |
| Vial:              | 1                        | Acq. Method:     | 10% 254              |  |  |
| Injection #:       | 1                        | Date Processed:  | 3/19/2018 8:25:58 PM |  |  |
| Injection Volume:  | 20.00 ul                 | Channel Name:    | 2487Channel 1        |  |  |
| Run Time:          | 120.00 Minutes           | Sample Set Name: |                      |  |  |

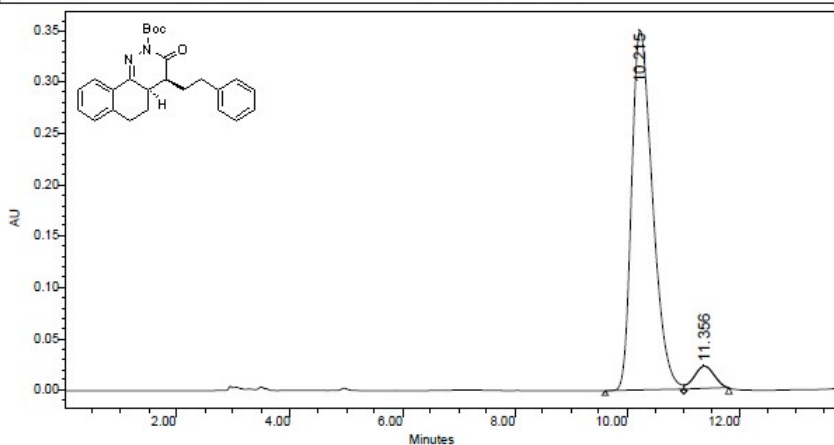

|   | RT (min) | Area (V*sec) | % Area | Height (V) | % Height |
|---|----------|--------------|--------|------------|----------|
| 1 | 10.215   | 9056287      | 94.27  | 350360     | 94.08    |
| 2 | 11.356   | 550509       | 5.73   | 22058      | 5.92     |
